# Supplementary material for: Perceptions of chronically ill and healthy consumers about electronic personal health records: a comparative empirical investigation
Source: PubMed Central journal article supplement — BMJ Open. 2014 Jul 23;4(7):e005304. doi: 10.1136/bmjopen-2014-005304 (PMC4120338; doi:10.1136/bmjopen-2014-005304), 2014-07-23
Supplement: bmjopen-2014-005304.draft_revisions.pdf [file bmjopen-2014-005304.draft_revisions.pdf]

# BMJ Open

## Perceptions of Chronically Ill and Healthy Consumers about Electronic Personal Health Records: A Comparative Empirical Investigation

|                                 |                                                                                                                                   |
|---------------------------------|-----------------------------------------------------------------------------------------------------------------------------------|
| Journal:                        | <i>BMJ Open</i>                                                                                                                   |
| Manuscript ID:                  | bmjopen-2014-005304                                                                                                               |
| Article Type:                   | Research                                                                                                                          |
| Date Submitted by the Author:   | 20-Mar-2014                                                                                                                       |
| Complete List of Authors:       | Cocosila, Mihail; Athabasca University, Faculty of Business<br>Archer, Norm; McMaster University, DeGroote School of Business     |
| <b>Primary Subject Heading</b>: | Health informatics                                                                                                                |
| Secondary Subject Heading:      | Public health                                                                                                                     |
| Keywords:                       | Information technology < BIOTECHNOLOGY & BIOINFORMATICS, Health informatics < BIOTECHNOLOGY & BIOINFORMATICS, PREVENTIVE MEDICINE |
|                                 |                                                                                                                                   |

SCHOLARONE™  
Manuscripts

**Research Article****Title:**

Perceptions of Chronically Ill and Healthy Consumers about Electronic Personal Health Records:  
A Comparative Empirical Investigation

**Corresponding Author:**

Mihail Cocosila, PhD

Faculty of Business  
Athabasca University  
1 University Drive  
Athabasca, AB T9S 3A3  
Canada  
Phone: 1-780-675-6100  
Fax: 1-780-675-6437  
Email: mihailc@athabascau.ca

**Authors:**

Mihail Cocosila<sup>1</sup>, PhD; Norm Archer<sup>2</sup>, PhD

<sup>1</sup>Faculty of Business, Athabasca University, Athabasca, Alberta, Canada

<sup>2</sup>DeGroot School of Business, McMaster University, Hamilton, Ontario, Canada

**Keywords:**

Personal Health Record, information technology, adoption, self-management, Canada

**Word count:**

3662 words (except tables)

1  
2  
3  
4  
5 **Perceptions of Chronically Ill and Healthy Consumers about Electronic Personal Health**  
6  
7  
8 **Records: A Comparative Empirical Investigation**  
9

10  
11  
12  
13  
14 **ABSTRACT**  
15

16  
17 **Objective** To accomplish a comparative study of the perceptions of electronic personal health  
18 records (PHRs) between consumers who reported having a chronic illness or disability and those  
19 who reported being well.  
20  
21  
22  
23

24  
25 **Materials and methods** A national survey was conducted with an Internet panel recruited across  
26 Canada. Data were collected from 800 individuals 18 years or older. Half reported having a  
27 chronic illness or disability and half reported being well. Analyses were done with Structural  
28 Equation Modeling techniques.  
29  
30  
31  
32  
33

34  
35 **Results** A total of 389 valid answers from chronically ill and 383 from well participants were  
36 collected. We found Perceived Usefulness to be the key explanation of the intention to use PHRs  
37 for both ill and well people (total effect of .601 and .565, respectively) followed by Security,  
38 Privacy, and Trust in PHRs (total effect of .377 and .479, respectively). Conversely, Computer  
39 Anxiety was perceived as a significant barrier (total effect of -.327 for ill individuals and -.212  
40 for well individuals).  
41  
42  
43  
44  
45  
46  
47  
48  
49

50  
51 **Discussion** Key motivators and barriers for user adoption of electronic PHRs that were identified  
52 are broadly in concordance with previous knowledge in behavioral research. We found little  
53  
54  
55  
56  
57  
58  
59  
60

1  
2  
3 difference in perceptions of electronic PHRs between chronically ill and well individuals,  
4  
5 although self-reporting their health status might have influenced the results.  
6  
7

8  
9 **Conclusions** To increase the adoption rate of electronic PHRs among both chronically ill and  
10  
11 well consumers it is necessary to reinforce people perceptions on the usefulness of and trust in  
12  
13 these eHealth technologies while mitigating consumer anxieties about computer use in general.  
14  
15

### 16 17 18 19 **Strengths and limitations of this study** 20

- 21  
22 • This research compared empirically the perceptions of chronically ill and well consumers  
23 about electronic PHRs using a rigorous theoretical approach.  
24  
25
- 26  
27 • The health condition of study participants was self-reported and not diagnosed by  
28  
29 practitioners.  
30  
31  
32  
33  
34  
35  
36  
37  
38  
39  
40  
41  
42  
43  
44  
45  
46  
47  
48  
49  
50  
51  
52  
53  
54  
55  
56  
57  
58  
59  
60

## OBJECTIVE

Given the current shortage of medical resources available for managing the growing numbers of patients with chronic illnesses, it is becoming apparent that patient self-management is key to managing such illnesses.[1] If health self-management is to function successfully, care plans and goals must be developed jointly by patients and their physicians, to move towards improved health and quality of life.[2] But to manage this process effectively, as in every management system, it is important to keep up-to-date records that can assist the patient and the patient's healthcare provider to monitor the patient's progress towards meeting the established self-care goals. It is also important to make these records readily accessible to both patients and their providers, in order that integration of care and sharing of information can occur both within and across services.[1, 3] An online health self-management system that is grounded in the chronic care model[4] and utilizes the patient's health record as a repository can support a system with self-management functionalities for assisting in improved patient-centered care.[5-8]

When health records are maintained and accessible by individual patients, these records are referred to as Personal Health Records (PHRs). Although they can be recorded and maintained in paper form, a fast emerging trend with the advent of digital data and the Internet is to keep them in an electronic format. Therefore, we will assume throughout this paper that PHRs refer to electronic records on digital media. A PHR can be defined as "An electronic application through which individuals can access, manage and share their health information, and that of others for whom they are authorized, in a private, secure, and confidential environment".[9] This is in contrast with EHR/EMRs (Electronic Health Records/Electronic Medical Records) which contain patient data gathered during the course of patient visits to healthcare providers, and are

1  
2  
3 managed solely by healthcare providers or healthcare institutions. Also, most EHR/EMR data are  
4  
5 based on acute care episodes[10] since people are more likely to see their doctors when they  
6  
7 have an acute problem.  
8  
9

10  
11 An ideal form of a PHR is one that exchanges data freely, as authorized by the patient and  
12  
13 physician, between the physician's EHR/EMR and the patient's records, as needed.[11] Types of  
14  
15 data that may be available in this way to a PHR include, but are not limited to: patient problem  
16  
17 lists, procedures, major illnesses, provider list, allergies, home monitored data (e.g., blood  
18  
19 pressure, glucose level, weight, exercise schedule, etc.), family history, lifestyle, immunizations,  
20  
21 medications, and lab tests.[10]  
22  
23  
24  
25

26  
27 In theory, PHRs can be of great use to patients in the self-management of chronic diseases and  
28  
29 disabilities, but there are significant obstacles to their sustainability, which refers to their  
30  
31 adoption and continued use. Trials of eHealth implementations tend to be prone to participant  
32  
33 dropouts, or attrition.[12] Reported attrition rates from the use of PHRs for health self-  
34  
35 management vary widely, from as low as 3% for an interactive web-based intervention that  
36  
37 included telephone counseling to 65% in a smoking cessation program, and to an enormous rate  
38  
39 of 99% in a panic disorder self-help program.[13, 14] Although factors affecting attrition tend to  
40  
41 be complex,[15] they must be addressed effectively if the benefits of self-management  
42  
43 interventions are to be maximized.  
44  
45  
46  
47

48  
49 The goal of better health may not be sufficient to motivate people to use PHRs, although there  
50  
51 are techniques to predict in advance whether patients will adopt and continue with beneficial  
52  
53 healthcare behaviors.[16] If patient motivation to adopt PHR innovations were better understood,  
54  
55  
56  
57  
58  
59  
60

1  
2  
3 resulting reductions in attrition rates would lead to improved outcomes from health self-  
4  
5 management interventions.  
6  
7

8  
9 Accordingly, the objective of this study is to help determine the motivation of individuals to  
10  
11 adopt PHRs, for the purpose of self-management of chronic ailments and disabilities. There are  
12  
13 indications that people with serious chronic ailments and disabilities are more likely to be  
14  
15 favorable to the adoption of PHRs than people who are well.[9] Therefore, in our study we  
16  
17 compare these two groups of people empirically to determine the factors by which chronically ill  
18  
19 or disabled people are more motivated to adopt PHRs than well individuals. Finally, we discuss  
20  
21 the results and their significance to further sustainable development and implementation of  
22  
23 PHRs, and consumer motivation to adopt and use them.  
24  
25  
26  
27  
28  
29  
30  
31

## 32 **BACKGROUND AND SIGNIFICANCE**

### 33 **Personal Health Records background**

34  
35  
36  
37  
38 Studies done in various parts of the world have indicated a great deal of public interest in PHRs.  
39  
40 For instance, a major motivation for over 70% of U.S. consumers is that they believe having  
41  
42 access to PHRs would improve the quality of their healthcare,[17] although as yet there is no  
43  
44 convincing evidence that this is the case. Field studies report the greatest interest in PHRs is  
45  
46 manifested by the chronically ill, frequent users of healthcare, and caregivers for elderly  
47  
48 parents.[9,18] The same studies show that among American consumers saying they were not  
49  
50 interested in using PHRs more than 55% indicated that worries about privacy and confidentiality  
51  
52 affected their reluctance. Moreover, about 90% of consumers surveyed felt that the provision of  
53  
54  
55  
56  
57  
58  
59  
60

1  
2  
3 privacy, record access, and user remedies would be significant factors affecting their agreement  
4 to use an online PHR service.[17] Conversely, some barriers to maintaining and accessing PHRs  
5  
6 include cost and loss of interest over time.[19]  
7  
8  
9

10  
11 Through online and decision support for patient-centered care, changes in healthcare practice can  
12 often help to meet practice and patient goals. For example, research has demonstrated  
13 improvements in diabetes outcomes and chronic illness self-management when behavioral  
14 support is forthcoming from relevant technologies, improving dietary practices, physical activity,  
15 and adherence to medication regimens.[20] Other studies indicate that social activities are  
16 particularly important for older people, with health benefits that may include less chance of  
17 mortality, disability, and depression, and better cognitive and health-related behaviors.[21]  
18  
19 Empirical studies have shown that relative advantage, ease of use, trialability, perceptions of  
20 privacy and security, age, and computer experience were positive predictors of the value of  
21 PHRs for supporting communications with the doctor's office.[22] Therefore, it is important to  
22 understand the key motivators and deterrents for PHR adoption with the target of improving the  
23 adoption rate and sustainability of these systems.  
24  
25  
26  
27  
28  
29  
30  
31  
32  
33  
34  
35  
36  
37  
38  
39  
40  
41  
42  
43

#### 44 **Theoretical model and hypotheses**

45  
46 In the following, we develop a theoretical model that takes into account the above considerations  
47 for chronically ill and disabled consumers on the one hand with consumers who feel that they are  
48 relatively healthy on the other hand, in order to compare their perceptions of PHRs. For that we  
49 use a number of key constructs validated by previous research in information systems and  
50  
51  
52  
53  
54  
55  
56  
57  
58  
59  
60



1  
2  
3 healthcare, and propose hypotheses regarding their relationships, based on empirical findings and  
4  
5 theoretical reasoning.  
6  
7

8  
9 *Information Seeking.* Although patients may prefer not to make all their own decisions about  
10  
11 their healthcare, they do want to be kept informed. Reportedly, over 40 percent of patients with  
12  
13 chronic conditions prefer to receive more information from their healthcare providers than they  
14  
15 actually received.[23] It seems, therefore, that patients with higher information seeking  
16  
17 preferences are more likely to feel that PHRs are useful in accessing information on their health  
18  
19 status than those who do not. Therefore, we propose the following hypothesis:  
20  
21

22  
23  
24 *H1: Consumers with higher information-seeking preferences will tend to believe that PHRs*  
25  
26 *would be more useful.*  
27  
28

29  
30 *Personal Information Technology Innovativeness.* This construct captures the willingness of an  
31  
32 individual to try out an information technology, as it relates to the concept of technology  
33  
34 acceptance.[24] This indicates that people exhibiting high levels of information technology  
35  
36 innovativeness will be more interested in accepting PHRs than those who do not. This leads to  
37  
38 the hypothesis:  
39  
40

41  
42 *H2: Individuals with higher levels of IT innovativeness will exhibit higher levels of perceived*  
43  
44 *usefulness for PHRs.*  
45  
46

47  
48 *Computer Anxiety.* This construct expresses an individual's apprehension or fear when faced  
49  
50 with the possibility of using a computer.[25] Previous research has found a negative relationship  
51  
52 between computer anxiety and perceived usefulness of new technology, as well as to intention to  
53  
54 use a new technology.[26, 27] This results in the following propositions:  
55  
56

1  
2  
3 *H3: Level of computer anxiety will be negatively related to the perceived usefulness of PHRs.*  
4  
5

6  
7 *H4: Level of computer anxiety will be negatively related to the intention to use PHRs.*  
8  
9

10 *Privacy, Security, and Trust.* These concepts have been consistently found in large scale studies  
11  
12 to have an impact on consumer interest in online PHR adoption.[28] While some surveys showed  
13  
14 two-thirds of adult consumers were concerned about security and privacy of their health  
15  
16 data,[17] other market studies found that consumers actually using a PHR did not worry too  
17  
18 much about its privacy implications.[29] The chronically and acutely ill and others who often  
19  
20 require healthcare appear to have fewer concerns about privacy than do health professionals.[30,  
21  
22 31] Consequently, we propose the following hypotheses:  
23  
24  
25

26  
27 *H5: Consumer perceptions of security, privacy, and trust in PHR providers will positively affect*  
28  
29 *their perceptions of PHR usefulness.*  
30  
31

32  
33 *H6: Consumer perceptions of security, privacy, and trust in PHR providers will positively affect*  
34  
35 *their intention to adopt PHRs.*  
36  
37

38 *Perceived Usefulness.* This construct is a widely known and strong extrinsic motivator of  
39  
40 technology use. It expresses “the degree to which a person believes that using a particular system  
41  
42 would enhance his or her job performance”. [32] In the case of PHR use, job performance  
43  
44 (expectancy) would refer to being able to self-monitor accurately certain health parameters.  
45  
46

47 Thus, it is logical to formulate the hypothesis below:  
48  
49

50  
51 *H7: Higher perceived usefulness for PHRs leads to a higher level of intention to adopt this*  
52  
53 *technology.*  
54  
55

1  
2  
3 The proposed constructs and their related hypotheses are shown in Figure 1 in the form of a  
4  
5 theoretical model of PHR adoption. The final endogenous construct of this model is Behavioral  
6  
7 Intention to adopt PHRs that measures potential user intentions regarding this eHealth support  
8  
9 tool.  
10  
11

12  
13 \*\*\* Insert Figure 1 here. \*\*\*  
14  
15

16  
17 **Figure 1** Theoretical Model of PHR Adoption  
18  
19

## 20 21 22 **MATERIALS AND METHODS** 23

### 24 25 **Participant recruitment and data collection** 26

27  
28 The theoretical model proposed by this study was tested with empirical data collected through an  
29  
30 online survey of Canadian consumers. Both French and English versions were prepared and pre-  
31  
32 tested with graduate students and practitioners in a Canadian university. The full scale survey  
33  
34 tested with graduate students and practitioners in a Canadian university. The full scale survey  
35  
36 was approved by the Research Ethics Board of the university and subsequently conducted with a  
37  
38 Canadian Internet panel of consumers through a market research company.  
39

40  
41 Participants were required to be at least 18 years old and willing to report their health condition.  
42  
43 800 of the participants who had pre-registered with the market research company participated in  
44  
45 the experiment: the sample was stratified to select exactly 400 who reported a chronic illness or  
46  
47 disability at various levels of severity, and exactly 400 who did not report such a condition.  
48  
49

50  
51 These two strata will be indicated in the remainder of this study as 'Ill' and 'Well'.  
52  
53  
54  
55  
56  
57  
58  
59  
60

1  
2  
3 All participants were presented a detailed description of an electronic Patient Health Record  
4 system and then asked to answer an online questionnaire. This comprised questions meant to  
5 measure the latent variables in the theoretical model described in Figure 1, together with relevant  
6 demographic characteristics of the participants surveyed. Most of the survey questions were  
7 adapted from those validated by previous research in healthcare[33] and information  
8 systems.[24, 27, 32] Measures for the only formative construct in the model, Security, Privacy  
9 and Trust, although initially sourced from relevant information systems literature, were designed  
10 and validated by this research. All responses were collected on 7-point Likert scales ranging  
11 from Strongly Disagree (1) to Strongly Agree (7), with an additional Not Applicable option.  
12  
13  
14  
15  
16  
17  
18  
19  
20  
21  
22  
23  
24  
25  
26  
27  
28

### 29 **Theoretical model evaluation**

30  
31  
32 As this research was intended mainly for exploratory purposes, data analysis was done with  
33 Partial Least Squares (PLS) due to the suitability of this Structural Equation Modeling  
34 methodology for complex exploratory models,[34] using formative indicators[35] such as the  
35 Security, Privacy and Trust construct used in this research. PLS analysis was carried out with the  
36 SmartPLS software tool[36] and included two successive model assessments: measurement tests  
37 followed by structural tests.[37] Each analysis for the two samples (Ill and Well) was done  
38 separately using the same model.  
39  
40  
41  
42  
43  
44  
45  
46  
47  
48  
49  
50  
51

### 52 **Assessment of differences between ill and well individuals**

1  
2  
3 Results of theoretical model tests for the two sub-samples were compared through differences in  
4 terms of the values of the path coefficients.[38] The degree of difference was assessed with the *t*-  
5  
6  
7  
8 statistic with  $N1+N2-2$  degrees of freedom,[39-41] where:

$$t = (Path1 - Path2)/[Spooled*\sqrt{(1/N1+1/N2)}]$$

11  
12  
13  
14 Here, *Path1*, *Path2* are the corresponding path coefficients in the model results and *N1*, *N2* are  
15  
16  
17 the respective sub-sample sizes.

18  
19  
20 *Spooled* represents the pooled estimator for the variance and is calculated from:

$$Spooled = \sqrt{\{[square\ of\ (N1-1)/(N1+N2-2)] * square\ of\ SE1 + [square\ of\ (N2-1)/(N1+N2-2)] * square\ of\ SE2\}}$$

21  
22  
23  
24  
25  
26  
27  
28 Here *SE1*, *SE2* are the standard errors of the corresponding path coefficients in the two sub-  
29  
30  
31 sample model results.

## 32 33 34 35 36 37 **RESULTS**

### 38 39 40 **Characteristics of study participants**

41  
42  
43  
44 After removing the cases with more than 10% missing answers, 389 Ill cases and 383 Well cases  
45  
46  
47 remained and were used in further statistical analyses. Raw data analyzed in this study were part  
48  
49  
50 of a larger project conducted in this setting. Table 1 shows comparative demographic  
51  
52  
53  
54  
55  
56  
57  
58  
59  
60 characteristics, summarized for the two strata.

**Table 1** Participant characteristics

|                                                                                                                            |                 | <b>Ill Participants</b> | <b>Well Participants</b> |
|----------------------------------------------------------------------------------------------------------------------------|-----------------|-------------------------|--------------------------|
| <b>Sample size</b>                                                                                                         |                 | 389                     | 383                      |
| <b>Age (years, average)</b>                                                                                                |                 | 52.5                    | 46.5                     |
| <b>Gender</b>                                                                                                              |                 |                         |                          |
|                                                                                                                            | Female          | 248 (63.7%)             | 221 (57.7%)              |
|                                                                                                                            | Male            | 141 (36.3%)             | 162 (42.3%)              |
| <b>Subject maintains up-to-date PHRs on paper</b>                                                                          |                 |                         |                          |
|                                                                                                                            | Yes             | 132 (34.0%)             | 74 (19.2%)               |
|                                                                                                                            | No              | 257 (66.0%)             | 309 (80.8%)              |
| <b>Subject maintains up-to-date electronic PHRs</b>                                                                        |                 |                         |                          |
|                                                                                                                            | Yes             | 46 (11.7%)              | 22 (5.8%)                |
|                                                                                                                            | No              | 343 (88.3%)             | 361 (94.2%)              |
| <b>Number of visits with a doctor during past 6 months (average)</b>                                                       |                 | 5.0                     | 2.3                      |
| <b>Number of doctors seen during past 6 months (average)</b>                                                               |                 | 2.3                     | 1.4                      |
| <b>Number of children 12 years old or younger for whom they have main care responsibility at home (average)</b>            |                 | 0.2                     | 0.3                      |
| <b>Subject (or someone for whom they are responsible) has a chronic disease that requires continuing medical attention</b> |                 |                         |                          |
|                                                                                                                            | Yes             | 308 (79.2%)             | 81 (21.2%)               |
|                                                                                                                            | No              | 81 (20.8%)              | 302 (78.8%)              |
| <b>Subject (or someone for whom they are responsible) has a disability that requires continuing care</b>                   |                 |                         |                          |
|                                                                                                                            | Yes             | 205 (52.7%)             | 42 (11.0%)               |
|                                                                                                                            | No              | 184 (47.3%)             | 341 (89.0%)              |
| <b>Subject is caring for elderly person(s)</b>                                                                             |                 |                         |                          |
|                                                                                                                            | Yes             | 49 (12.6%)              | 21 (5.5%)                |
|                                                                                                                            | No              | 340 (87.4%)             | 362 (94.5%)              |
| <b>Subject is interested in regularly maintaining records about health</b>                                                 |                 |                         |                          |
|                                                                                                                            | Yes             | 323 (83.0%)             | 247 (64.4%)              |
|                                                                                                                            | No              | 66 (17.0%)              | 136 (35.6%)              |
| <b>Average amount of time spent using the Internet at home daily (largest two categories out of five)</b>                  |                 |                         |                          |
|                                                                                                                            | 31 - 60 minutes | 263 (67.7%)             | 222 (58.0%)              |
|                                                                                                                            | 11 - 30 minutes | 99 (25.5%)              | 111 (29.0%)              |

## Theoretical model evaluation

An initial evaluation of the measurement model that comprised 22 items indicated the necessity to drop 2 items when running it with the Ill data sample and 3 items when running it with the Well data sample, because of unsatisfactory significance and loading values of these items. After re-running SmartPLS for the remaining items, all reflective constructs for both samples displayed Cronbach's alpha and composite reliability values above 0.7, Average Variance Extracted (AVE) values above 0.5, and item loadings above 0.7, while the remaining items of the formative construct Security, Privacy and Trust in PHR were significant and had loadings above 0.5. Thus, the measurement model was considered to have acceptable reliability and convergent validity for both sub-samples.[38 ,42, 43]

A visual inspection of a matrix having the square root of AVEs on the diagonal and the correlations between all reflective constructs in the off diagonal cells showed diagonal numbers to be larger than all numbers on the corresponding rows and columns for both sub-samples (Table 2). This led to the conclusion that the model's reflective constructs had sufficient discriminant validity for both sub-samples.[37] Consequently, the measurement tests of the model for both sub-samples indicated adequate reliability and construct validity. This allowed the second step of the PLS process, which was to perform the structural analysis of the model.

**Table 2** Reflective construct correlations and square root of AVEs (Ill sample numbers off parentheses and Well sample numbers in parentheses)

|  | Computer | Behavioral | Information | Perceived | Personal IT |
|--|----------|------------|-------------|-----------|-------------|
|--|----------|------------|-------------|-----------|-------------|

|                                   | Anxiety            | Intention          | Seeking            | Usefulness         | Innovativeness     |
|-----------------------------------|--------------------|--------------------|--------------------|--------------------|--------------------|
| <b>Computer Anxiety</b>           | <b>0.89 (0.91)</b> |                    |                    |                    |                    |
| <b>Behavioral Intention</b>       | -0.51 (-0.38)      | <b>0.87 (0.93)</b> |                    |                    |                    |
| <b>Information Seeking</b>        | -0.13 (-0.13)      | 0.27 (0.24)        | <b>0.86 (0.88)</b> |                    |                    |
| <b>Perceived Usefulness</b>       | -0.47 (-0.31)      | 0.76 (0.75)        | 0.33 (0.34)        | <b>0.92 (0.92)</b> |                    |
| <b>Personal IT Innovativeness</b> | -0.33 (-0.17)      | 0.46 (0.38)        | 0.07 (0.03)        | 0.39 (0.42)        | <b>0.92 (0.94)</b> |

Evaluation of the structural model involved running SmartPLS with a bootstrap of 200 re-samples. Results for path coefficients, their significance levels, and the values of  $R^2$  are compared in Figure 2 for both sub-samples.

\*\*\* Insert Figure 2 here. \*\*\*

**Figure 2** Path coefficients, significance levels and  $R^2$  values for the PHR adoption model (Ill sub-sample numbers above the line and Well sub-sample numbers below the line)

SmartPLS results also provided the total effects of the factors in the theoretical model on behavioral intention to use PHRs, for the two categories of participants (Table 3).

**Table 3** Total effects and their significance levels on behavioral intention to adopt PHRs

| Antecedent Construct         | Ill Sample  |         | Well Sample |         |
|------------------------------|-------------|---------|-------------|---------|
|                              | Coefficient | P-value | Coefficient | P-value |
| Computer Anxiety             | -.327       | <.001   | -.212       | .01     |
| Information Seeking          | .118        | .01     | .141        | .01     |
| Perceived Usefulness         | .601        | <.001   | .565        | <.001   |
| Personal IT Innovativeness   | .100        | .08     | .162        | .01     |
| Security, Privacy, and Trust | .377        | <.001   | .479        | <.001   |



1  
2  
3  
4  
5  
6  
7  
8 All characteristics in Table 1 were tested as potential control variables. In the case of the PHR Ill  
9 sub-sample the only influence came from the factor '*subject is interested in regularly*  
10 *maintaining records about health*'. This factor influenced positively the Perceived Usefulness  
11 construct (path coefficient of .234 at a  $P = .02$  significance level) and increased the variance  
12 explained by this construct from  $R^2 = 0.473$  to  $R^2 = 0.521$ ). In the case of the PHR Well sub-  
13 sample the same interest in regularly maintaining records about health influenced positively the  
14 Perceived Usefulness construct (path coefficient of .171 at a  $P = .04$  significance level and  
15 increased the variance explained from  $R^2 = 0.474$  to  $R^2 = 0.499$ ). In addition for this sub-sample,  
16 the factor increased Behavioral Intention (path coefficient of .154 at a  $P = .03$  significance level  
17 and increase of variance explained from  $R^2 = 0.620$  to  $R^2 = 0.640$ ). So, the results for the control  
18 variable '*subject is interested in regularly maintaining records about health*' played a significant  
19 role in both sub-samples.  
20  
21  
22  
23  
24  
25  
26  
27  
28  
29  
30  
31  
32  
33  
34  
35  
36  
37  
38  
39

#### 40 **Assessment of differences between ill and well individuals**

41  
42  
43 The results of the differences between the path coefficients of the model for the two sub-samples  
44 are presented jointly in Table 4. No  $P$ -values were calculated since the lack of statistical  
45 significance, at a level of probability  $P < .05$ , of the difference between the results from the two  
46 sub-samples (indicated by the low absolute  $t$ -value of the difference) is very clear.  
47  
48  
49  
50  
51  
52  
53  
54

55 **Table 4** Statistical analysis of differences between Ill and Well consumer sub-samples  
56  
57  
58  
59  
60

| Path                                                | Ill Sub-sample Path Coefficient | Well Sub-sample Path Coefficient | Absolute <i>t</i> -value of Difference |
|-----------------------------------------------------|---------------------------------|----------------------------------|----------------------------------------|
| Computer Anxiety → Behavioral Intention             | -.177                           | -.142                            | 0.348                                  |
| Computer Anxiety → Perceived Usefulness             | -.249                           | -.123                            | 1.021                                  |
| Information Seeking → Perceived Usefulness          | .196                            | .249                             | 0.479                                  |
| Perceived Usefulness → Behavioral Intention         | .601                            | .565                             | 0.255                                  |
| Personal IT Innovativeness → Perceived Usefulness   | .167                            | .287                             | 0.982                                  |
| Security, Privacy, and Trust → Behavioral Intention | .140                            | .244                             | 0.717                                  |
| Security, Privacy, and Trust → Perceived Usefulness | .393                            | .416                             | 0.161                                  |

## DISCUSSION

### Principal findings and comparison with prior work

The objective of this study was to determine the key motivators for individuals to adopt electronic Personal Health Records, through a theoretical behavioral model. As previous research and theoretical reasoning indicated that people with chronic illnesses may be more likely to be favorable to the adoption of PHRs than people who are well,[9] in our study we compared two sub-samples drawn in Canada from these two populations in order to assess empirically the possible behavioral differences and their determinants.

Our study (Table 3 and Figure 2) confirms the findings of an overwhelming body of research in information systems according to which Perceived Usefulness is the key explanation of the behavioral intention to use an information technology application.[44] Therefore individuals, either chronically ill or well, would use PHRs only if they see the usefulness of these artifacts.

1  
2  
3 This is concordant with findings on other empirical studies on PHRs that showed relative  
4 advantage[22] or perception of empowerment[45] as key motivators of adoption.  
5  
6

7  
8  
9 As expected from previous research,[17] the perception of Security, Privacy, and Trust in PHRs  
10 is a significant motivator for use in both categories of individuals surveyed. Table 3 shows this  
11 factor is second in terms of total effect to Perceived Usefulness only, being significant at  $P <$   
12  $.001$  for both sub-samples. Interestingly, Security, Privacy, and Trust in PHRs has a non-  
13 significant direct influence on Behavioral Intention to use PHRs for the Ill sub-sample  
14 (coefficient =  $.140$ ,  $P = .15$ ). This means security, privacy and trust mean less for ill people – the  
15 association of these features with usefulness is more important in the adoption equation. This is  
16 confirmed by previous research showing that benefits of access to medical records online may  
17 outweigh privacy risk perceptions.[46]  
18  
19  
20  
21  
22  
23  
24  
25  
26  
27  
28  
29

30  
31 Study results confirm that Information Seeking and Personal IT Innovativeness are motivators of  
32 PHR use for both categories of potential users while exerting their influence through Perceived  
33 Usefulness (Table 3 and Figure 2). However, the total effect of Personal IT Innovativeness over  
34 adoption intention is not significant for the Ill sub-sample, but it is for the Well sub-sample  
35 (Table 3). This suggests that technical innovativeness means less for ill people than it does for  
36 well people, indicating that ill people are less interested in adopting a PHR just because it is  
37 innovative, but for other reasons, including the value it can provide in managing their disease(s).  
38  
39  
40  
41  
42  
43  
44  
45  
46  
47

48  
49 As hypothesized, Computer Anxiety is the only deterrent on PHR adoption in the theoretical  
50 model proposed by this study. It has a negative total influence significant at  $P < .001$  for the Ill  
51 sub-sample and at  $P = .01$  for the Well sub-sample (Table 3). Results in Figure 2 confirm that the  
52 influence of Anxiety is less apparent for the Well sub-sample compared to the Ill sub-sample.  
53  
54  
55  
56  
57  
58  
59  
60

1  
2  
3 Therefore ill individuals, who, presumably, might be attracted to using PHRs, would be more  
4 concerned about the skills necessary to access computer-based PHRs. Their concerns would  
5  
6 clearly have to be addressed in order to increase PHR adoption.  
7  
8  
9

10  
11 All demographic characteristics measured and reported in Table 1 were tested as control  
12 variables but had no effect for either sample with the exception of participant interest in regularly  
13 maintaining records about health. This factor was positive for both sub-samples but more so for  
14 the Well one. Therefore, individual interest in self-monitoring health makes them better able to  
15 perceive PHR usefulness and to want to use these systems.  
16  
17  
18  
19  
20  
21  
22

23  
24 Overall, the original model proposed by this study to explain the adoption of PHRs had  
25 moderately high variance explained values for all the endogenous constructs, for both sub-  
26 samples ( $R^2$  of 0.473/0.474 for Perceived Usefulness and 0.620/0.626 for Behavioral Intention)  
27 and 6 out of 7 significant paths in both cases (Figure 2). Therefore, from the statistical point of  
28 view, this model could be considered to be reasonably good.[47]  
29  
30  
31  
32  
33  
34  
35  
36  
37  
38  
39

#### 40 **Assessment of differences between ill and well individuals**

41  
42 The key outcomes from the study are in Table 4, which shows that there were no significant  
43 differences between the Ill and Well sub-samples for any of the paths in Figure 2. On the surface,  
44 these outcomes appear to contradict what we had expected – that people with chronic illnesses or  
45 disabilities are more interested in PHR adoption than are well people. We suspect that the  
46 differences are masked by the fact that many of the people in the Ill sample were, in fact, not  
47 seriously ill. The low rate of current PHR use in the both sub-samples could be another  
48  
49  
50  
51  
52  
53  
54  
55  
56  
57  
58  
59  
60

1  
2  
3 explanation for the non-significant differences in perceptions between them. Findings from  
4  
5 consumers, especially those with serious chronic illnesses, who had a considerable amount of  
6  
7 experience with well-designed PHRs, might be more conclusive than the results from this  
8  
9 comparative survey.  
10  
11  
12  
13

### 14 15 16 17 **Limitations**

18  
19  
20 As virtually any empirical research, this study has also some limitations. First, it is likely that  
21  
22 the functionalities that accompany PHR systems would have a strong influence on their adoption.  
23  
24 This aspect was not measured in this study. Second, the participants were all Internet users, so it  
25  
26 excluded many, particularly older, consumers who were not. In fact more than 60% of the survey  
27  
28 participants overall claimed to use the Internet for from 30 to 60 minutes per day. On the other  
29  
30 hand, the proportion of Internet and portable device users falls off rapidly with age beyond 65  
31  
32 years,[48] especially for lower income seniors. Therefore, “those who can benefit the most from  
33  
34 a PHR system may be the least able to use it”.[49] In addition to all these limitations, the most  
35  
36 important for a comparative study such as this, participant health conditions were self-reported  
37  
38 and not diagnosed by practitioners. Therefore, it is possible that the difference we found in  
39  
40 overall perceptions between the two sub-samples was not significant because the difference in  
41  
42 participant self-reported health condition between the two sub-samples was weak.  
43  
44  
45  
46  
47  
48  
49  
50  
51

### 52 **CONCLUSIONS**

53  
54  
55  
56  
57  
58  
59  
60

1  
2  
3 Despite the inherent limitations of an exploratory study, this research has the merit of  
4  
5 investigating individual perceptions about electronic PHRs, using a rigorous theoretical approach  
6  
7 that considers the perspectives of ill and well people separately. To maximize the chances of  
8  
9 adoption for PHR support in self-management initiatives, it appears necessary to enhance the  
10  
11 motivators, especially the perceptions of usefulness as well as that of security, privacy and trust  
12  
13 in PHRs, while mitigating anxieties associated with computer use.  
14  
15

16  
17  
18 A first exposure to PHRs did not reveal significantly different perceptions of this tool between  
19  
20 individuals who reported having a chronic illness and those who reported being well. Therefore  
21  
22 it appears that both categories of potential users should be addressed by promoters of PHRs in  
23  
24 much the same way in terms of motivating and demotivating factors. However, caution is  
25  
26 advised regarding assumptions of equivalence between individuals who report being chronically  
27  
28 ill and those who have been diagnosed accordingly. Thus, future studies should attempt to survey  
29  
30 chronically ill patients recruited through the healthcare system, after having a specified  
31  
32 experience with self-managing their conditions with the aid of PHRs. A comparison of their  
33  
34 perceptions of PHRs with those of well individuals would help to improve our understanding of  
35  
36 how the adoption of PHRs could be increased overall.  
37  
38  
39  
40  
41  
42  
43  
44  
45

46 **Funding** This research was funded by a grant from the Canadian Institutes for Health Research.  
47  
48 This organization was not involved directly in the design or implementation of this study. This  
49  
50 article is solely the responsibility of the authors and does not necessarily represent the official  
51  
52 views of the Canadian Institutes of Health Research.  
53  
54  
55  
56  
57  
58  
59  
60

1  
2  
3  
4  
5  
6 **Competing interests** None.  
7  
8  
9

10  
11  
12 **Ethics approval** Research Ethics Board of a Canadian university.  
13  
14

15  
16  
17  
18 **Data sharing statement** No additional data available.  
19  
20

## 21 22 23 24 25 **REFERENCES** 26

- 27 1. Holman H, Lorig, K. Patient self-management: a key to effectiveness and efficiency in  
28 care of chronic disease. *Public Health Reports* 2004;**119**:239-43.
- 29 2. Warsi A, Wang PS, LaValley MP, et al. Self-management education programs in chronic  
30 disease. *Arch Intern Med* 2004;**164**(15):1641-9. PMID: 15302634.
- 31 3. Weitzman ER, Kaci L, Mandl KD. Acceptability of a personally controlled health record  
32 in a community-based setting: implications for policy and design. *J Med Internet Res*  
33 2009;**11**(2):e14. URL: <http://www.jmir.org/2009/2/e14/> doi: 10.2196/jmir.1187 PMID:  
34 19403467.
- 35 4. Bodenheimer T, Wagner EH, Grumbach K. Improving chronic care for patients with  
36 chronic illness: the chronic care model, Part 2. *J Am Med Assoc* 2002;**16**(288):1909-14.  
37 PMID: 12377092.
- 38 5. Alphin S, Kjoller M, Davidsen M, et al. Self-reported ischemic heart disease: prevalence,  
39 sociodemographics, health behavior, health-care utilization, and quality of life. *Open J*  
40 *Prev Med* 2012;**2**(2):240-8.
- 41 6. Hess R, Bryce CL, Paone S, et al. Exploring challenges and potentials of personal health  
42 records in diabetes self-management: implementation and initial assessment. *Telemed J E*  
43 *Health* 2007;**13**(5):509-18.
- 44 7. Siminerio LM. The role of technology and the chronic care model. *J Diabetes Sci*  
45 *Technol* 2010;**4**(2):470-5.
- 46 8. Wiljer D, Urowitz S, Apatu E, et al. Patient accessible electronic health records:  
47 exploring recommendations for successful implementation strategies. *J Med Internet Res*  
48 2008;**10**(4):e34. URL: <http://www.jmir.org/2008/4/e34/> doi: 10.2196/jmir.1061 PMID:  
49 18974036.  
50  
51  
52  
53  
54  
55  
56  
57  
58  
59  
60

- 1  
2  
3 9. Markle Foundation. The personal health working group final report 2003.  
4 URL:<http://research.policyarchive.org/15473.pdf>. Accessed: 2013-10-27. (Archived by  
5 WebCite® at <http://www.webcitation.org/6KhE3vwDS>).
- 6  
7 10. Tang PC, Ash JS, Bates DW, et al. Personal health records: Definitions, benefits, and  
8 strategies for overcoming barriers to adoption. *J Am Med Inform Assoc* 2006 Mar-  
9 Apr;**13**(2):121-6. doi: 10.1197/jamia.M2025 PMID: 16357345.
- 10  
11 11. Halamka JD, Mandl KD, Tang PC. Early experiences with personal health records. *J Am*  
12 *Med Inform Assoc* 2008 Jan-Feb;**15**(1):1-7. PMID: 17947615.
- 13  
14 12. Eysenbach G. The law of attrition. *J Med Internet Res* 2005;**7**(1):e11. URL:  
15 <http://www.jmir.org/2005/1/e11/> doi: 10.2196/jmir.7.1.e11 PMID: 15829473.
- 16  
17 13. Farvolden P, Denisoff E, Selby P, et al. Usage and longitudinal effectiveness of a web-  
18 based self-help cognitive behavioral therapy program for panic disorder. *J Med Internet*  
19 *Res* 2005;**7**(1):e7. URL: <http://www.jmir.org/2005/1/e7/> doi: 10.2196/jmir.7.1.e7 PMID:  
20 15829479.
- 21  
22 14. Etter JF. Comparing the efficacy of two Internet-based, computer-tailored smoking  
23 cessation programs: a randomized trial. *J Med Internet Res* 2005;**7**(1):e2. URL:  
24 <http://www.jmir.org/2005/1/e2/> doi: 10.2196/jmir.7.1.e2 PMID: 15829474.
- 25  
26 15. Fielding D, Duff A. Compliance with treatment protocols: interventions for children with  
27 chronic illness. *Arch Dis Child* 1999 Feb;**80**(2):196-200. PMID: 10325743.
- 28  
29 16. Shankar A, Conner M, Bodansky HJ. Can the theory of planned behaviour predict  
30 maintenance of a frequently repeated behaviour? *Psychol Health Med*. 2007  
31 Mar;**12**(2):213-224. PMID: 17365901.
- 32  
33 17. Markle Foundation. Americans overwhelmingly believe electronic personal health  
34 records could improve their health 2008. URL:  
35 <http://www.markle.org/sites/default/files/ResearchBrief-200806.pdf>. Accessed: 2013-10-  
36 27. (Archived by WebCite® at <http://www.webcitation.org/67gKru0S3>).
- 37  
38 18. Lafky DB, Horan TA. Prospective personal health record use among different user  
39 groups: results of a multi-wave study. Hawaii International Conference on System  
40 Sciences, Proceedings of the 41st Annual, Hawaii, U.S.A, 7-10 Jan. 2008. doi:  
41 10.1109/HICSS.2008.363.
- 42  
43 19. King DK, Toobert DJ, Portz JD, et al. What patients want: relevant health information  
44 technology for diabetes self-management. *Health and Technology* 2012;**2**:147-157. doi:  
45 10.1007/s12553-012-0022-7.
- 46  
47 20. Benhamou PY. Improving diabetes management with electronic health records and  
48 patients' health records. *Diabetes Metab* 2011 Dec;**37** Suppl 4:S53-S56. doi:  
49 10.1016/S1262-3636(11)70966-1. PMID: 22208711.
- 50  
51 21. Gilmour H. Social participation and the health and well-being of Canadian seniors.  
52 *Health Rep* 2012 Dec;**23**(4):23-32. PMID: 23356042.
- 53  
54 22. Emani S, Yamin CK, Peters E, et al. Patient perceptions of a personal health record: a test  
55 of the Diffusion of Innovation model. *J Med Internet Res* 2012;**14**(6):e150. URL:  
56 <http://www.jmir.org/2012/6/e150/> doi: 10.2196/jmir.2278 PMID: 23128775.
- 57  
58 23. Strull WM, Lo B, Charles G. Do patients want to participate in medical decision making?  
59 *J Am Med Assoc*, 1984 Dec 7;**252**(21):2990-4. PMID: 6502860.
- 60



- 1
  - 2
  - 3
  - 4
  - 5
  - 6
  - 7
  - 8
  - 9
  - 10
  - 11
  - 12
  - 13
  - 14
  - 15
  - 16
  - 17
  - 18
  - 19
  - 20
  - 21
  - 22
  - 23
  - 24
  - 25
  - 26
  - 27
  - 28
  - 29
  - 30
  - 31
  - 32
  - 33
  - 34
  - 35
  - 36
  - 37
  - 38
  - 39
  - 40
  - 41
  - 42
  - 43
  - 44
  - 45
  - 46
  - 47
  - 48
  - 49
  - 50
  - 51
  - 52
  - 53
  - 54
  - 55
  - 56
  - 57
  - 58
  - 59
  - 60
24. Agarwal R, Prasad J. A conceptual and operational definition of personal innovativeness in the domain of information technology. *Information Systems Research* 1998;**9**(2):204-15.
25. Simonson MR, Maurer M, Montag-Torardi M, et al. Development of a standardized test of computer literacy and a computer anxiety index. *Journal of Educational Computing Research* 1987;**3**(2):231-247.
26. Igarria M, Schiffman SJ, Wieckowski TJ. The respective roles of perceived usefulness and perceived fun in the acceptance of microcomputer technology. *Behaviour and Information Technology* 1994;**13**(6):349-61.
27. Venkatesh V, Morris MG, Davis GB, et al. User acceptance of information technology: Toward a unified view. *MIS Quarterly* 2003;**27**(3):425-478.
28. Wen KY, Kreps G, Zhu F, et al. Consumers' perceptions about and use of the Internet for personal health records and health information exchange: analysis of the 2007 Health Information National Trends survey. *J Med Internet Res* 2010;**12**(4):e73.  
URL: <http://www.jmir.org/2010/4/e73/> doi: 10.2196/jmir.1668 PMID: 21169163.
29. CHCF. Consumers and health information technology: a national survey 2010.  
URL:<http://www.chcf.org/publications/2010/04/consumers-and-health-information-technology-a-national-survey>. Accessed: 2013-10-27. (Archived by WebCite® at <http://www.webcitation.org/6Ki6wprfO>).
30. Hassol A, Walker JM, Kidder D, et al. Patient experiences and attitudes about access to a patient electronic health care record and linked Web messaging. *J Am Med Inform Assoc* 2004 Nov-Dec;**11**(6):505-13. PMID: 15299001.
31. Walker J, Ahern DK, Le LX, et al. Insights for internists: "I want the computer to know who I am". *J Gen Intern Med* 2009 Jun;**24**(6):727-32. doi: 10.1007/s11606-009-0973-1 PMID: 19412641.
32. Davis F. Perceived usefulness, perceived ease of use, and user acceptance of information technology. *MIS Quarterly* 1989;**13**(3):319-40.
33. Wilson EV, Lankton NK. Modeling patients' acceptance of provider-delivered e-health. *J Am Med Inform Assoc*. 2004 Jul-Aug;**11**(4):241-8. PMID: 15064290.
34. Bontis N, Crossan MM, Hulland J. Managing an organizational learning system by aligning stocks and flows. *Journal of Management Studies* 2002;**39**(4):437-69.
35. Thomas RD, Lu IRR, Cedzynski M. Partial least squares: a critical review and a potential alternative. 2005 Administrative Sciences Association of Canada Conference, Toronto, Ontario, Canada.  
URL:<http://citeseerx.ist.psu.edu/viewdoc/download?doi=10.1.1.86.1719&rep=rep1&type=pdf>. Accessed: 2013-10-28. (Archived by WebCite® at <http://www.webcitation.org/6Ki8UyHTh>).
36. Ringle CM, Wende S, Will, A. SmartPLS 2.0 (M3) Beta; 2005.  
URL:<http://www.smartpls.de/forum>. Accessed: 2013-10-28. (Archived by WebCite® at <http://www.webcitation.org/5uZLmc5cJ>).
37. Gefen D, Straub D. A practical guide to factorial validity using PLS-Graph: tutorial and annotated example. *Communications of the Association for Information Systems* 2005;**16**:91-109.

- 1  
2  
3  
4  
5  
6  
7  
8  
9  
10  
11  
12  
13  
14  
15  
16  
17  
18  
19  
20  
21  
22  
23  
24  
25  
26  
27  
28  
29  
30  
31  
32  
33  
34  
35  
36  
37  
38  
39  
40  
41  
42  
43  
44  
45  
46  
47  
48  
49  
50  
51  
52  
53  
54  
55  
56  
57  
58  
59  
60
38. Jarvenpaa SL, Shaw TR, Staples DS. Toward contextualized theories of trust: the role of trust in global virtual teams. *Information Systems Research* 2004 September; **15**(3):250-267.
  39. Ahuja MK, Thatcher, JB. Moving beyond intentions and toward the theory of trying: effects of work environment and gender on post-adoption information technology use. *MIS Quarterly* 2005 Sep; **29**(3):427-59.
  40. Archer N, Cocosila M. A comparison of physician pre-adoption and adoption views on Electronic Health Records in Canadian medical practices. *J Med Internet Res* 2011; **13**(3):e57. URL: <http://www.jmir.org/2011/3/e57/> doi: 10.2196/jmir.1726 PMID: 21840835.
  41. Chin WW. Frequently asked questions - Partial Least Squares & PLS-Graph; 2000. URL: <http://disc-nt.cba.uh.edu/chin/plsfaq/plsfaq.htm>. Accessed: 2013-10-28. (Archived by WebCite® at <http://www.webcitation.org/5uZMSOxrz>).
  42. Bontis N. National intellectual capital index: a United Nations initiative for the Arab region. *Journal of Intellectual Capital* 2004; **5**(1):13-39.
  43. Fornell C, Larcker, DF. Evaluating structural equation models with unobservable variables and measurement error. *Journal of Marketing Research* 1981; **18**(1):39-50.
  44. Venkatesh V, Speier C, Morris MG. User acceptance enablers in individual decision making about technology: toward an integrated model. *Decision Sciences* 2002; **33**(2):297-316.
  45. Agarwal R, Anderson C, Zarate J, et al. If we offer it, will they accept? Factors affecting patient use intentions of personal health records and secure messaging *J Med Internet Res* 2013; **15**(2):e43. URL: <http://www.jmir.org/2013/2/e43/> doi: 10.2196/jmir.2243 PMID: 23470453.
  46. Vodicka E, Mejilla R, Leveille SG, et al. Online access to doctors' notes: patient concerns about privacy. *J Med Internet Res* 2013; **15**(9):e208. URL: <http://www.jmir.org/2013/9/e208/> doi: 10.2196/jmir.2670 PMID: 24072335.
  47. Bontis N, Keow WCC, Richardson S. Intellectual capital and business performance in Malaysian industries. *Journal of Intellectual Capital* 2000; **1**(1):85-100.
  48. Pew Internet. Mobile Health 2012. Pew Internet Research Center 2012. URL: <http://pewinternet.org/Reports/2012/Mobile-Health.aspx>. Accessed: 2013-10-28. (Archived by WebCite® at <http://www.webcitation.org/6Ki9MnKwz>).
  49. Kim EH, Stolyar A, Lober WB, et al. Challenges to using an electronic personal health record by a low-income elderly population. *J Med Internet Res* 2009; **11**(4):e44. URL: <http://www.jmir.org/2009/4/e44/> doi: 10.2196/jmir.1256 PMID: 19861298.

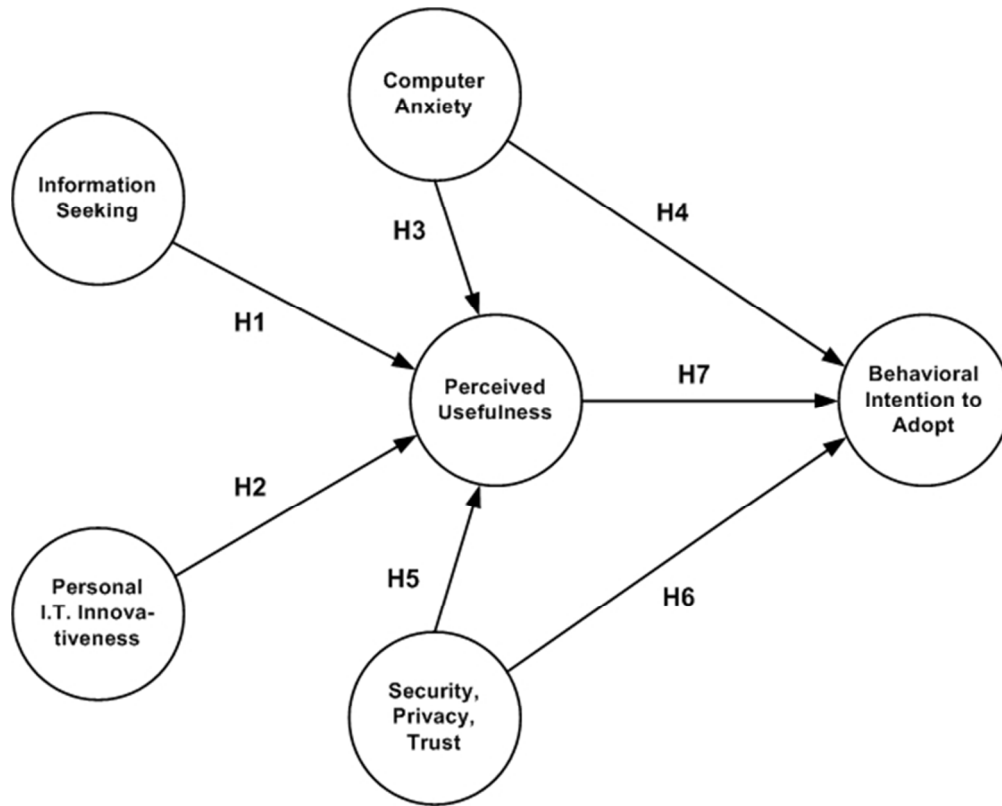

163x130mm (96 x 96 DPI)

ew only

1  
2  
3  
4  
5  
6  
7  
8  
9  
10  
11  
12  
13  
14  
15  
16  
17  
18  
19  
20  
21  
22  
23  
24  
25  
26  
27  
28  
29  
30  
31  
32  
33  
34  
35  
36  
37  
38  
39  
40  
41  
42  
43  
44  
45  
46  
47  
48  
49  
50  
51  
52  
53  
54  
55  
56  
57  
58  
59  
60

1  
2  
3  
4  
5  
6  
7  
8  
9  
10  
11  
12  
13  
14  
15  
16  
17  
18  
19  
20  
21  
22  
23  
24  
25  
26  
27  
28  
29  
30  
31  
32  
33  
34  
35  
36  
37  
38  
39  
40  
41  
42  
43  
44  
45  
46  
47  
48  
49  
50  
51  
52  
53  
54  
55  
56  
57  
58  
59  
60

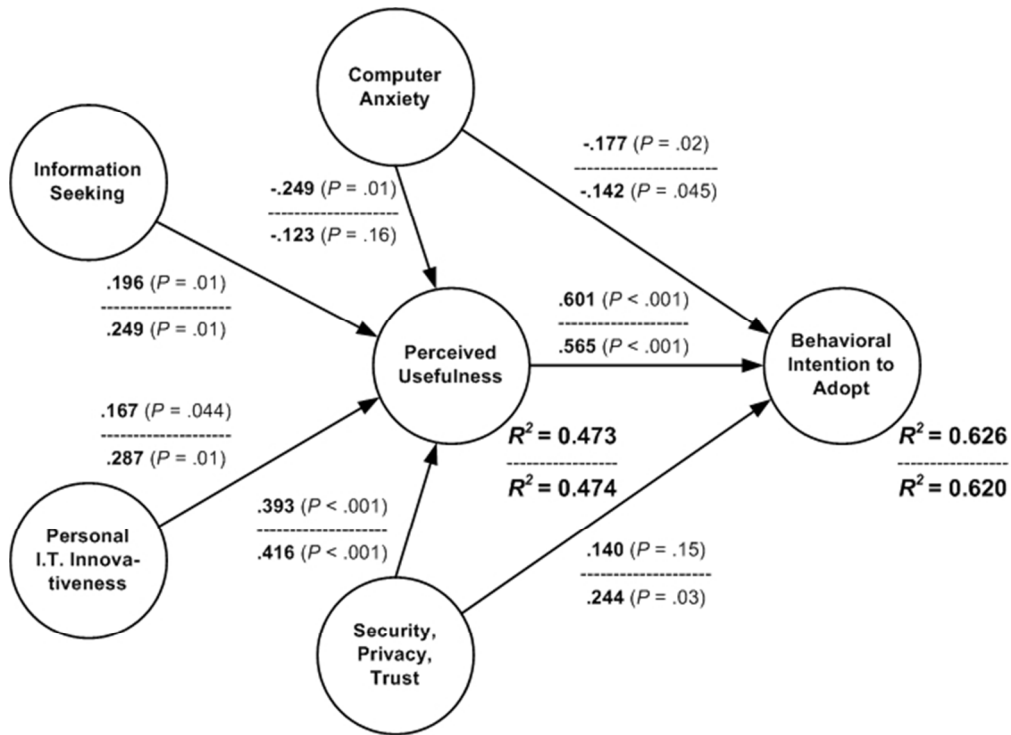

179x130mm (96 x 96 DPI)

view only

STROBE 2007 (v4) Statement—Checklist of items that should be included in reports of *cross-sectional studies*

| Section/Topic                | Item # | Recommendation                                                                                                                                                                       | Reported on page # |
|------------------------------|--------|--------------------------------------------------------------------------------------------------------------------------------------------------------------------------------------|--------------------|
| Title and abstract           | 1      | (a) Indicate the study's design with a commonly used term in the title or the abstract                                                                                               | 1                  |
|                              |        | (b) Provide in the abstract an informative and balanced summary of what was done and what was found                                                                                  | 1, 2               |
| <b>Introduction</b>          |        |                                                                                                                                                                                      |                    |
| Background/rationale         | 2      | Explain the scientific background and rationale for the investigation being reported                                                                                                 | 3-6                |
| Objectives                   | 3      | State specific objectives, including any prespecified hypotheses                                                                                                                     | 6-9                |
| <b>Methods</b>               |        |                                                                                                                                                                                      |                    |
| Study design                 | 4      | Present key elements of study design early in the paper                                                                                                                              | 9, 10              |
| Setting                      | 5      | Describe the setting, locations, and relevant dates, including periods of recruitment, exposure, follow-up, and data collection                                                      | 9, 10              |
| Participants                 | 6      | (a) Give the eligibility criteria, and the sources and methods of selection of participants                                                                                          | 9                  |
| Variables                    | 7      | Clearly define all outcomes, exposures, predictors, potential confounders, and effect modifiers. Give diagnostic criteria, if applicable                                             | 10                 |
| Data sources/<br>measurement | 8*     | For each variable of interest, give sources of data and details of methods of assessment (measurement). Describe comparability of assessment methods if there is more than one group | 10                 |
| Bias                         | 9      | Describe any efforts to address potential sources of bias                                                                                                                            | 9                  |
| Study size                   | 10     | Explain how the study size was arrived at                                                                                                                                            | 9                  |
| Quantitative variables       | 11     | Explain how quantitative variables were handled in the analyses. If applicable, describe which groupings were chosen and why                                                         | 10, 11             |
| Statistical methods          | 12     | (a) Describe all statistical methods, including those used to control for confounding                                                                                                | 10, 11             |
|                              |        | (b) Describe any methods used to examine subgroups and interactions                                                                                                                  | 10,11              |
|                              |        | (c) Explain how missing data were addressed                                                                                                                                          | 11                 |
|                              |        | (d) If applicable, describe analytical methods taking account of sampling strategy                                                                                                   |                    |
|                              |        | (e) Describe any sensitivity analyses                                                                                                                                                |                    |
| <b>Results</b>               |        |                                                                                                                                                                                      |                    |

|                          |     |                                                                                                                                                                                                              |        |
|--------------------------|-----|--------------------------------------------------------------------------------------------------------------------------------------------------------------------------------------------------------------|--------|
| Participants             | 13* | (a) Report numbers of individuals at each stage of study—eg numbers potentially eligible, examined for eligibility, confirmed eligible, included in the study, completing follow-up, and analysed            | 11     |
|                          |     | (b) Give reasons for non-participation at each stage                                                                                                                                                         | 11     |
|                          |     | (c) Consider use of a flow diagram                                                                                                                                                                           |        |
| Descriptive data         | 14* | (a) Give characteristics of study participants (eg demographic, clinical, social) and information on exposures and potential confounders                                                                     | 12     |
|                          |     | (b) Indicate number of participants with missing data for each variable of interest                                                                                                                          | 11     |
| Outcome data             | 15* | Report numbers of outcome events or summary measures                                                                                                                                                         | 12     |
| Main results             | 16  | (a) Give unadjusted estimates and, if applicable, confounder-adjusted estimates and their precision (eg, 95% confidence interval). Make clear which confounders were adjusted for and why they were included | 14, 15 |
|                          |     | (b) Report category boundaries when continuous variables were categorized                                                                                                                                    |        |
|                          |     | (c) If relevant, consider translating estimates of relative risk into absolute risk for a meaningful time period                                                                                             |        |
| Other analyses           | 17  | Report other analyses done—eg analyses of subgroups and interactions, and sensitivity analyses                                                                                                               | 15, 16 |
| <b>Discussion</b>        |     |                                                                                                                                                                                                              |        |
| Key results              | 18  | Summarise key results with reference to study objectives                                                                                                                                                     | 16-19  |
| Limitations              | 19  | Discuss limitations of the study, taking into account sources of potential bias or imprecision. Discuss both direction and magnitude of any potential bias                                                   | 19     |
| Interpretation           | 20  | Give a cautious overall interpretation of results considering objectives, limitations, multiplicity of analyses, results from similar studies, and other relevant evidence                                   | 20     |
| Generalisability         | 21  | Discuss the generalisability (external validity) of the study results                                                                                                                                        | 20     |
| <b>Other information</b> |     |                                                                                                                                                                                                              |        |
| Funding                  | 22  | Give the source of funding and the role of the funders for the present study and, if applicable, for the original study on which the present article is based                                                | 20     |

\*Give information separately for cases and controls in case-control studies and, if applicable, for exposed and unexposed groups in cohort and cross-sectional studies.

**Note:** An Explanation and Elaboration article discusses each checklist item and gives methodological background and published examples of transparent reporting. The STROBE checklist is best used in conjunction with this article (freely available on the Web sites of PLoS Medicine at <http://www.plosmedicine.org/>, Annals of Internal Medicine at <http://www.annals.org/>, and Epidemiology at <http://www.epidem.com/>). Information on the STROBE Initiative is available at [www.strobe-statement.org](http://www.strobe-statement.org).

# BMJ Open

## Perceptions of Chronically Ill and Healthy Consumers about Electronic Personal Health Records: A Comparative Empirical Investigation

|                                 |                                                                                                                                   |
|---------------------------------|-----------------------------------------------------------------------------------------------------------------------------------|
| Journal:                        | <i>BMJ Open</i>                                                                                                                   |
| Manuscript ID:                  | bmjopen-2014-005304.R1                                                                                                            |
| Article Type:                   | Research                                                                                                                          |
| Date Submitted by the Author:   | 28-May-2014                                                                                                                       |
| Complete List of Authors:       | Cocosila, Mihail; Athabasca University, Faculty of Business<br>Archer, Norm; McMaster University, DeGroote School of Business     |
| <b>Primary Subject Heading</b>: | Health informatics                                                                                                                |
| Secondary Subject Heading:      | Public health                                                                                                                     |
| Keywords:                       | Information technology < BIOTECHNOLOGY & BIOINFORMATICS, Health informatics < BIOTECHNOLOGY & BIOINFORMATICS, PREVENTIVE MEDICINE |
|                                 |                                                                                                                                   |

SCHOLARONE™  
Manuscripts

**Research Article****Title:**

Perceptions of Chronically Ill and Healthy Consumers about Electronic Personal Health Records:  
A Comparative Empirical Investigation

**Corresponding Author:**

Mihail Cocosila, PhD

Faculty of Business  
Athabasca University  
1 University Drive  
Athabasca, AB T9S 3A3  
Canada  
Phone: 1-780-675-6100  
Fax: 1-780-675-6437  
Email: mihailc@athabascau.ca

**Authors:**

Mihail Cocosila<sup>1</sup>, PhD; Norm Archer<sup>2</sup>, PhD

<sup>1</sup>Faculty of Business, Athabasca University, Athabasca, Alberta, Canada

<sup>2</sup>DeGroot School of Business, McMaster University, Hamilton, Ontario, Canada

**Keywords:**

Personal Health Record, information technology, adoption, self-management, Canada

**Word count:**

4208 words (excluding tables)



1  
2  
3  
4  
5  
6  
7  
8  
9  
10  
11  
12  
13  
14  
15  
16  
17  
18  
19  
20  
21  
22  
23  
24  
25  
26  
27  
28  
29  
30  
31  
32  
33  
34  
35  
36  
37  
38  
39  
40  
41  
42  
43  
44  
45  
46  
47  
48  
49  
50  
51  
52  
53  
54  
55  
56  
57  
58  
59  
60

## Perceptions of Chronically Ill and Healthy Consumers about Electronic Personal Health Records: A Comparative Empirical Investigation

### ABSTRACT

**Objective** To develop a model of consumer perceptions of electronic personal health records (PHRs) and validate it in a comparative study between consumers who report having a chronic illness and those who report being well.

**Materials and methods** A model of PHR use motivators and barriers was built and tested through a national survey across Canada. Data were collected from 800 individuals 18 years or older. Half reported having a chronic illness or disability and half reported being well. Analyses were done with Structural Equation Modeling techniques.

**Results** A total of 389 answers from chronically ill and 383 from well participants were collected. Perceived Usefulness was the key explanation of the intention to use PHRs for both ill and well people (total effect of .601 and .565, respectively) followed by Security, Privacy, and Trust in PHRs (total effect of .377 and .479, respectively). Conversely, Computer Anxiety was perceived as a significant barrier (total effect of -.327 for ill individuals and -.212 for well individuals).

**Discussion** The model proposed was appropriate in explaining key consumer positive and negative perceptions on electronic PHR use. We found little difference in perceptions of

1  
2  
3 electronic PHRs between chronically ill and well individuals, although self-reporting their health  
4  
5 status might have influenced the results.  
6  
7

8  
9 **Conclusions** To increase the adoption rate of electronic PHRs among both chronically ill and  
10  
11 well consumers it is necessary to reinforce consumer perceptions of the usefulness of and trust in  
12  
13 these eHealth technologies while mitigating their anxieties about computer use in general.  
14  
15

### 16 17 18 19 **Strengths and limitations of this study**

- 20  
21  
22 • This study developed an unbiased theoretical model of consumer perceptions of  
23  
24 electronic personal health records (PHRs).  
25  
26
- 27  
28 • The model was validated through empirical research comparing the perceptions of  
29  
30 chronically ill and well consumers about electronic PHRs.  
31  
32
- 33  
34 • The health condition of study participants was self-reported and not diagnosed by  
35  
36 practitioners.  
37  
38  
39  
40  
41  
42  
43  
44  
45  
46  
47  
48  
49  
50  
51  
52  
53  
54  
55  
56  
57  
58  
59  
60

## OBJECTIVE

Given the current shortage of medical resources available for managing the growing numbers of patients with chronic illnesses, it is becoming apparent that patient self-management is key to managing such illnesses and improving health and quality of life.[1, 2] To manage this process effectively it is important for patients to maintain up-to-date and readily accessible health records.[1, 3] An online health self-management system that is grounded in the chronic care model[4] and that utilizes the patient's health record as a repository can support a system with self-management functionalities for assisting in improved patient-centered care.[5-8]

Health records maintained and accessible by individual consumers are referred to as Personal Health Records (PHRs). Although they can be recorded and maintained in paper form, a fast emerging trend with the advent of digital data and the Internet is to keep them in an electronic format. Therefore, we will assume throughout this paper that PHRs refer to electronic records on digital media. A PHR can be defined as "An electronic application through which individuals can access, manage and share their health information, and that of others for whom they are authorized, in a private, secure, and confidential environment".[9] This is in contrast with EHR/EMRs (Electronic Health Records/Electronic Medical Records) which contain patient data gathered during the course of patient visits to healthcare providers, and are managed solely by healthcare providers or healthcare institutions. Also, most EHR/EMR data are based on acute care episodes[10] since people are more likely to see their doctors when they have an acute problem.

An ideal form of a PHR is one that exchanges data freely, as authorized by the patient and physician, between the physician's EHR/EMR and the patient's records, as needed.[11]

1  
2  
3 In theory, PHRs can be of great use to patients in the self-management of chronic diseases and  
4 disabilities, but there are significant obstacles to their sustainability, which refers to their  
5 adoption and continued use. Trials of eHealth implementations tend to be prone to participant  
6 dropouts (attrition).[12] Reported attrition rates from the use of PHRs for health self-  
7 management vary widely, from as low as 3% for an interactive web-based intervention that  
8 included telephone counseling, to 65% in a smoking cessation program, and to an enormous rate  
9 of 99% in a panic disorder self-help program.[13, 14] Although factors affecting attrition tend to  
10 be complex,[15] they must be addressed effectively if the benefits of self-management  
11 interventions are to be maximized.  
12  
13  
14  
15  
16  
17  
18  
19  
20  
21  
22  
23  
24

25 The goal of better health may not be sufficient to motivate people to use PHRs, although there  
26 are techniques to predict in advance whether patients will adopt and continue with beneficial  
27 healthcare behaviors.[16] If patient motivation to adopt PHR innovations were better understood,  
28 resulting reductions in attrition rates would lead to improved outcomes from health self-  
29 management interventions.  
30  
31  
32  
33  
34  
35  
36  
37

38 Accordingly, the objective of this study is to determine the key motivators and barriers for  
39 individuals to adopt PHRs. As there are indications that people with serious chronic ailments and  
40 disabilities are more likely to be favorable to the adoption of PHRs than people who are well,[9]  
41 we compared these two groups of people empirically to determine possible differences between  
42 adoption factors. Finally, we discuss the results and their significance to further sustainable  
43 development and implementation of PHRs, and consumer motivation to adopt and use them.  
44  
45  
46  
47  
48  
49  
50  
51  
52  
53  
54  
55  
56  
57  
58  
59  
60

## BACKGROUND AND SIGNIFICANCE

### Personal Health Records background

Studies done in various parts of the world have indicated a great deal of public interest in PHRs. For instance, a major motivation for over 70% of U.S. consumers is that they believe having access to PHRs would improve the quality of their healthcare,[17] although as yet there is no convincing evidence that this is the case. Field studies report the greatest interest in PHRs is manifested by the chronically ill, frequent users of healthcare, and caregivers for elderly parents.[9,18] The same studies show that among American consumers saying they were not interested in using PHRs more than 55% indicated that worries about privacy and confidentiality affected their reluctance. Moreover, about 90% of consumers surveyed felt that the provision of privacy, record access, and user remedies would be significant factors affecting their agreement to use an online PHR service.[17] Conversely, some barriers to maintaining and accessing PHRs include cost and loss of interest over time.[19]

Through online and decision support for patient-centered care, changes in healthcare practice can often help to meet practice and patient goals. For example, research has demonstrated improvements in diabetes outcomes and chronic illness self-management when behavioral support is forthcoming from relevant technologies, improving dietary practices, physical activity, and adherence to medication regimens.[20] Other studies indicate that social activities are particularly important for older people, with health benefits that may include less chance of mortality, disability, and depression, and better cognitive and health-related behaviors.[21] Empirical studies have shown that relative advantage, ease of use, trialability, perceptions of privacy and security, age, and computer experience were positive predictors of the value of

1  
2  
3 PHRs for supporting communications with the doctor's office.[22] Therefore it is important to  
4  
5 understand the key motivators and deterrents for PHR adoption, with the target of improving the  
6  
7 adoption rate and sustainability of these systems.  
8  
9

### 10 11 12 13 14 **Theoretical model and hypotheses** 15

16  
17  
18 In the following, we develop a theoretical model that takes into account the above considerations  
19  
20 and test it for chronically ill and disabled consumers on the one hand and with consumers who  
21  
22 feel that they are relatively healthy on the other hand, in order to compare their perceptions of  
23  
24 PHRs. For this purpose we use a number of key constructs validated by previous research in  
25  
26 information systems and healthcare, and propose hypotheses regarding their relationships, based  
27  
28 on empirical findings and theoretical reasoning.  
29  
30

31  
32  
33 *Information Seeking.* Although patients may prefer not to make all their own decisions about  
34  
35 their healthcare, they do want to be kept informed. Reportedly, over 40 percent of patients with  
36  
37 chronic conditions prefer to receive more information from their healthcare providers than they  
38  
39 actually receive.[23] It seems, therefore, that patients with higher information seeking  
40  
41 preferences are more likely to feel that PHRs are useful in accessing information on their health  
42  
43 status than those who do not. Therefore, we propose the following hypothesis:  
44  
45

46  
47  
48 *H1: Consumers with higher information-seeking preferences will tend to believe that PHRs*  
49  
50 *would be more useful.*  
51

52  
53  
54 *Personal Information Technology Innovativeness.* This construct captures the willingness of an  
55  
56 individual to try out an information technology, as it relates to the concept of technology  
57

1  
2  
3 acceptance.[24] This indicates that people exhibiting high levels of information technology  
4  
5 innovativeness will be more interested in accepting PHRs than those who do not. This leads to  
6  
7 the hypothesis:  
8  
9

10  
11 *H2: Individuals with higher levels of IT innovativeness will exhibit higher levels of perceived*  
12  
13 *usefulness for PHRs.*

14  
15  
16  
17 *Computer Anxiety.* This construct expresses an individual's apprehension or fear when faced  
18  
19 with the possibility of using a computer.[25] Previous research has found a negative relationship  
20  
21 between computer anxiety and perceived usefulness of new technology, as well as to intention to  
22  
23 use a new technology.[26, 27] This results in the following propositions:  
24  
25

26  
27 *H3: Level of computer anxiety will be negatively related to the perceived usefulness of PHRs.*  
28  
29

30  
31 *H4: Level of computer anxiety will be negatively related to the intention to use PHRs.*  
32

33  
34 *Privacy, Security, and Trust.* These concepts have been consistently found in large scale studies  
35  
36 to have an impact on consumer interest in online PHR adoption.[28] While some surveys showed  
37  
38 two-thirds of adult consumers were concerned about security and privacy of their health  
39  
40 data,[17] other market studies found that consumers actually using a PHR did not worry too  
41  
42 much about its privacy implications.[29] The chronically and acutely ill and others who often  
43  
44 require healthcare appear to have fewer concerns about privacy than do health professionals.[30,  
45  
46  
47 31] Consequently, we propose the following hypotheses:  
48  
49

50  
51 *H5: Consumer perceptions of appropriate security and privacy of PHRs, and trust in PHR*  
52  
53 *providers will positively affect their perceptions of PHR usefulness.*  
54  
55

1  
2  
3 *H6: Consumer perceptions of appropriate security and privacy of PHRs, and trust in PHR*  
4 *providers will positively affect their intention to adopt PHRs.*  
5  
6  
7

8  
9 *Perceived Usefulness.* This construct is a widely known and strong extrinsic motivator of  
10 technology use. It expresses “the degree to which a person believes that using a particular system  
11 would enhance his or her job performance”.<sup>[32]</sup> In the case of PHR use, job performance  
12 (expectancy) would refer to being able to self-monitor accurately certain health parameters.  
13  
14  
15  
16  
17 Thus, it is logical to formulate the hypothesis below:  
18  
19

20  
21 *H7: Higher perceived usefulness for PHRs leads to a higher level of intention to adopt this*  
22 *technology.*  
23  
24  
25

26  
27 The proposed constructs and their related hypotheses are shown in Figure 1 in the form of a  
28 theoretical model of PHR adoption. The final endogenous construct of this model is Behavioral  
29 Intention to adopt PHRs that measures potential user intentions regarding this eHealth support  
30 tool.  
31  
32  
33  
34  
35

36  
37 \*\*\* Insert Figure 1 here. \*\*\*  
38  
39

40  
41 **Figure 1** Theoretical model of PHR adoption  
42  
43  
44  
45

## 46 **MATERIALS AND METHODS**

47

### 48 **Participant recruitment and data collection**

49  
50  
51

52 The theoretical model proposed by this study was tested with empirical data collected through an  
53 online survey of Canadian consumers. Both French and English versions were prepared and pre-  
54  
55  
56  
57



1  
2  
3 tested with graduate students and practitioners in a Canadian university. The full scale survey  
4  
5 was approved by the Research Ethics Board of the university and subsequently conducted with a  
6  
7 Canadian Internet panel of consumers through a market research company. There is no  
8  
9 relationship between the researchers and this company, and the company was not allowed to  
10  
11 analyze nor retain any copies of the data collected during the survey.  
12  
13

14  
15  
16 Participants were required to be at least 18 years old and willing to report their health condition.  
17  
18 Participants were provided detailed descriptions of a chronic illness condition and of its typical  
19  
20 degrees of severity: mild, moderate and severe. 800 of the participants who had pre-registered  
21  
22 with the market research company participated in the experiment: the sample was stratified to  
23  
24 select exactly 400 who reported a chronic illness or disability at various levels of severity, and  
25  
26 exactly 400 who did not report such a condition. These two strata will be indicated in the  
27  
28 remainder of this study as 'Ill' and 'Well'.  
29  
30  
31

32  
33 All participants were presented a detailed description of an electronic Patient Health Record  
34  
35 system and then asked to answer an online questionnaire. The questions it contained were meant  
36  
37 to measure the multi-item latent variables in the theoretical model described in Figure 1, together  
38  
39 with relevant demographic characteristics of the participants surveyed. Most of the survey  
40  
41 questions were adapted from those validated by previous research in healthcare (e.g.,  
42  
43 *Information Seeking*)[33] and information systems (e.g., *Personal Information Technology*  
44  
45 *Innovativeness*, *Computer Anxiety*, *Perceived Usefulness* and *Behavioral Intention*).[24, 27, 32]  
46  
47  
48 Measures for the only formative construct in the model, *Security, Privacy and Trust*, although  
49  
50 initially sourced from separate constructs in relevant information systems literature, were  
51  
52 designed and validated as describing a single variable for this research. Measurement scales are  
53  
54  
55  
56  
57  
58  
59  
60

1  
2  
3 included in Appendix A. All responses were collected on 7-point Likert scales ranging from  
4  
5 Strongly Disagree (1) to Strongly Agree (7), with an additional Not Applicable option. Cases  
6  
7 with more than 10% missing answers were deemed invalid and removed from the data analysis.  
8  
9

### 10 11 12 13 14 **Theoretical model evaluation** 15

16  
17 As this research was intended mainly for exploratory purposes, data analysis was done with  
18  
19 Partial Least Squares (PLS) due to the suitability of this Structural Equation Modeling  
20  
21 methodology for complex exploratory models,[34] using formative indicators[35] such as the  
22  
23 Security, Privacy and Trust construct used in this research. PLS analysis was carried out with the  
24  
25 SmartPLS software tool[36] and included two successive model assessments: measurement tests  
26  
27 (assessing the reliability and validity of the construct measures), followed by structural tests  
28  
29 (evaluating the relationships between model constructs).[37] Each analysis for the two sub-  
30  
31 samples (Ill and Well) was done separately using the same model.  
32  
33  
34  
35

36  
37 Use of the PLS tool for analysis determined the minimum study sample size. As the study  
38  
39 involves a complex formative construct (i.e., Security, Privacy and Trust), the sample size should  
40  
41 be at least ten times the number of its indicators.[38] Furthermore, sample size should account  
42  
43 for possible high non-response rates or invalid cases in health-related studies. These  
44  
45 considerations led to the target of 400 respondents in each of the two sub-samples.  
46  
47  
48  
49

### 50 51 52 53 **Assessment of differences between ill and well individuals** 54 55

1  
2  
3 Results of theoretical model tests for the two sub-samples were compared through differences in  
4 terms of the values of the path coefficients determined by PLS analysis.[38] The degree of  
5 difference was assessed with the *t*-statistic with  $N1+N2-2$  degrees of freedom,[39-41] where:  
6  
7  
8  
9

$$10 \quad t = (Path1 - Path2)/[Spooled*\sqrt{(1/N1+1/N2)}]$$

11  
12 Here, *Path1*, *Path2* are the corresponding path coefficients in the model results and *N1*, *N2* are  
13 the respective sub-sample sizes.  
14  
15  
16

17  
18 *Spooled* represents the pooled estimator for the variance and is calculated from:  
19  
20

$$21 \quad Spooled = \sqrt{\{[square\ of\ (N1-1)/(N1+N2-2)]*\square\ of\ SE1 + [square\ of\ (N2-1)/(N1+N2-2)]*\square\ of\ SE2\}}$$

22  
23 Here *SE1*, *SE2* are the standard errors of the corresponding path coefficients in the two sub-  
24 sample model results.  
25  
26  
27  
28

## 29 30 31 32 33 34 35 36 37 **RESULTS**

### 38 39 40 **Characteristics of study participants**

41  
42 After removing the invalid cases, a total of 389 Ill cases and 383 Well cases remained and were  
43 used in further statistical analyses. Raw data analyzed in this study were part of a larger project  
44 conducted in this setting. Table 1 shows comparative demographic characteristics, summarized  
45 for the two strata.  
46  
47  
48  
49  
50  
51  
52  
53  
54  
55  
56  
57  
58  
59  
60

**Table 1** Participant characteristics

|                                                                                                                            |                 | <b>Ill Participants</b> | <b>Well Participants</b> |
|----------------------------------------------------------------------------------------------------------------------------|-----------------|-------------------------|--------------------------|
| <b>Sample size</b>                                                                                                         |                 | 389                     | 383                      |
| <b>Age (years, average)</b>                                                                                                |                 | 52.5                    | 46.5                     |
| <b>Gender</b>                                                                                                              |                 |                         |                          |
|                                                                                                                            | Female          | 248 (63.7%)             | 221 (57.7%)              |
|                                                                                                                            | Male            | 141 (36.3%)             | 162 (42.3%)              |
| <b>Subject maintains up-to-date PHRs on paper</b>                                                                          |                 |                         |                          |
|                                                                                                                            | Yes             | 132 (34.0%)             | 74 (19.2%)               |
|                                                                                                                            | No              | 257 (66.0%)             | 309 (80.8%)              |
| <b>Subject maintains up-to-date electronic PHRs</b>                                                                        |                 |                         |                          |
|                                                                                                                            | Yes             | 46 (11.7%)              | 22 (5.8%)                |
|                                                                                                                            | No              | 343 (88.3%)             | 361 (94.2%)              |
| <b>Number of visits with a doctor during past 6 months (average)</b>                                                       |                 | 5.0                     | 2.3                      |
| <b>Number of doctors seen during past 6 months (average)</b>                                                               |                 | 2.3                     | 1.4                      |
| <b>Number of children 12 years old or younger for whom they have main care responsibility at home (average)</b>            |                 | 0.2                     | 0.3                      |
| <b>Subject (or someone for whom they are responsible) has a chronic disease that requires continuing medical attention</b> |                 |                         |                          |
|                                                                                                                            | Yes             | 308 (79.2%)             | 81 (21.2%)               |
|                                                                                                                            | No              | 81 (20.8%)              | 302 (78.8%)              |
| <b>Subject (or someone for whom they are responsible) has a disability that requires continuing care</b>                   |                 |                         |                          |
|                                                                                                                            | Yes             | 205 (52.7%)             | 42 (11.0%)               |
|                                                                                                                            | No              | 184 (47.3%)             | 341 (89.0%)              |
| <b>Subject is caring for elderly person(s)</b>                                                                             |                 |                         |                          |
|                                                                                                                            | Yes             | 49 (12.6%)              | 21 (5.5%)                |
|                                                                                                                            | No              | 340 (87.4%)             | 362 (94.5%)              |
| <b>Subject is interested in regularly maintaining records about health</b>                                                 |                 |                         |                          |
|                                                                                                                            | Yes             | 323 (83.0%)             | 247 (64.4%)              |
|                                                                                                                            | No              | 66 (17.0%)              | 136 (35.6%)              |
| <b>Average amount of time spent using the Internet at home daily (largest two categories out of five)</b>                  |                 |                         |                          |
|                                                                                                                            | 31 - 60 minutes | 263 (67.7%)             | 222 (58.0%)              |
|                                                                                                                            | 11 - 30 minutes | 99 (25.5%)              | 111 (29.0%)              |

## Theoretical model evaluation

An initial evaluation of the *measurement model* that comprised 22 items indicated the necessity of dropping 2 items when running it with the Ill data sample and 3 items when running it with the Well data sample, because of unsatisfactory significance and loading values of these items. After re-running SmartPLS for the remaining items, all reflective constructs for both samples displayed Cronbach's alpha and composite reliability values above 0.7, Average Variance Extracted (AVE) values above 0.5, and item loadings above 0.7, while the remaining items of the formative construct Security, Privacy and Trust in PHR were significant and had loadings above 0.5. Thus, the measurement model was considered to have acceptable reliability and convergent validity for both sub-samples.[38 ,42, 43]

A visual inspection of a matrix having the square root of AVEs on the diagonal and the correlations between all reflective constructs in the off diagonal cells showed diagonal numbers to be larger than all numbers on the corresponding rows and columns for both sub-samples (Table 2). This led to the conclusion that the model's reflective constructs had sufficient discriminant validity for both sub-samples.[37] Consequently, the measurement tests of the model for both sub-samples indicated adequate reliability and construct validity for all measurement instruments, either adapted from previous research or developed by this study. This allowed the second step of the PLS process, which was to perform the structural analysis of the model.

**Table 2** Reflective construct correlations and square root of AVEs (Ill sample numbers off parentheses and Well sample numbers in parentheses)

|                                   | <b>Computer Anxiety</b> | <b>Behavioral Intention</b> | <b>Information Seeking</b> | <b>Perceived Usefulness</b> | <b>Personal IT Innovativeness</b> |
|-----------------------------------|-------------------------|-----------------------------|----------------------------|-----------------------------|-----------------------------------|
| <b>Computer Anxiety</b>           | <b>0.89 (0.91)</b>      |                             |                            |                             |                                   |
| <b>Behavioral Intention</b>       | -0.51 (-0.38)           | <b>0.87 (0.93)</b>          |                            |                             |                                   |
| <b>Information Seeking</b>        | -0.13 (-0.13)           | 0.27 (0.24)                 | <b>0.86 (0.88)</b>         |                             |                                   |
| <b>Perceived Usefulness</b>       | -0.47 (-0.31)           | 0.76 (0.75)                 | 0.33 (0.34)                | <b>0.92 (0.92)</b>          |                                   |
| <b>Personal IT Innovativeness</b> | -0.33 (-0.17)           | 0.46 (0.38)                 | 0.07 (0.03)                | 0.39 (0.42)                 | <b>0.92 (0.94)</b>                |

Evaluation of the *structural model* involved running SmartPLS with a bootstrap of 200 re-samples. Results for path coefficients, their significance levels, and the values of  $R^2$  are compared in Figure 2 for both sub-samples.

\*\*\* Insert Figure 2 here. \*\*\*

**Figure 2** Path coefficients, significance levels and  $R^2$  values for the PHR adoption model (Ill sub-sample numbers above the line and Well sub-sample numbers below the line)

SmartPLS results also provided the total effects of the factors in the theoretical model on behavioral intention to use PHRs, for the two categories of participants (Table 3).

**Table 3** Total effects and their significance levels on behavioral intention to adopt PHRs

| <b>Antecedent Construct</b> | <b>Ill Sample</b>  |                | <b>Well Sample</b> |                |
|-----------------------------|--------------------|----------------|--------------------|----------------|
|                             | <b>Coefficient</b> | <b>P-value</b> | <b>Coefficient</b> | <b>P-value</b> |

|                              |       |       |       |       |
|------------------------------|-------|-------|-------|-------|
| Computer Anxiety             | -.327 | <.001 | -.212 | .01   |
| Information Seeking          | .118  | .01   | .141  | .01   |
| Perceived Usefulness         | .601  | <.001 | .565  | <.001 |
| Personal IT Innovativeness   | .100  | .08   | .162  | .01   |
| Security, Privacy, and Trust | .377  | <.001 | .479  | <.001 |

All characteristics in Table 1 were tested as potential control variables. In the case of the PHR Ill sub-sample the only influence came from the factor '*subject is interested in regularly maintaining records about health*'. This factor influenced positively the Perceived Usefulness construct (path coefficient of .234 at a  $P = .02$  significance level) and increased the variance explained by this construct from  $R^2 = 0.473$  to  $R^2 = 0.521$ ). In the case of the PHR Well sub-sample the same interest in regularly maintaining records about health influenced positively the Perceived Usefulness construct (path coefficient of .171 at a  $P = .04$  significance level and increased the variance explained from  $R^2 = 0.474$  to  $R^2 = 0.499$ ). In addition for this sub-sample, the factor increased Behavioral Intention (path coefficient of .154 at a  $P = .03$  significance level and increase of variance explained from  $R^2 = 0.620$  to  $R^2 = 0.640$ ). So, the results for the control variable '*subject is interested in regularly maintaining records about health*' played a significant role in both sub-samples.

The self-reported degree of severity of the chronic illness or condition (i.e., mild, moderate or severe) was tested as a possible control variable for the Ill sub-sample. No statistically significant effects on the theoretical model were noticed.

### Assessment of differences between ill and well individuals

The results of the differences between the path coefficients of the model for the two sub-samples are presented jointly in Table 4. No *P*-values were calculated since the lack of statistical significance, at a level of probability  $P < .05$ , of the difference between the results from the two sub-samples (indicated by the low absolute *t*-value of the difference) is very clear.

**Table 4** Statistical analysis of differences between Ill and Well consumer sub-samples

| Path                                                | Ill Sub-sample Path Coefficient | Well Sub-sample Path Coefficient | Absolute <i>t</i> -value of Difference |
|-----------------------------------------------------|---------------------------------|----------------------------------|----------------------------------------|
| Computer Anxiety → Behavioral Intention             | -.177                           | -.142                            | 0.348                                  |
| Computer Anxiety → Perceived Usefulness             | -.249                           | -.123                            | 1.021                                  |
| Information Seeking → Perceived Usefulness          | .196                            | .249                             | 0.479                                  |
| Perceived Usefulness → Behavioral Intention         | .601                            | .565                             | 0.255                                  |
| Personal IT Innovativeness → Perceived Usefulness   | .167                            | .287                             | 0.982                                  |
| Security, Privacy, and Trust → Behavioral Intention | .140                            | .244                             | 0.717                                  |
| Security, Privacy, and Trust → Perceived Usefulness | .393                            | .416                             | 0.161                                  |

## DISCUSSION

### Principal findings and comparison with prior work

The objective of this study was to determine the key motivators for individuals to adopt electronic Personal Health Records, through a theoretical behavioral model developed here. Furthermore, as previous research and theoretical reasoning indicated that people with chronic illnesses may be more likely to be favorable to the adoption of PHRs than people who are well,[9] in our study we use the model we developed to compare two sub-samples drawn in



1  
2  
3 Canada from these two populations in order to assess empirically the possible behavioral  
4  
5 differences and their determinants.  
6  
7

8  
9 Our study (Table 3 and Figure 2) confirms largely the findings of research in information  
10  
11 systems according to which Perceived Usefulness is the key explanation of the behavioral  
12  
13 intention to use an information technology application.[44] Therefore individuals, either  
14  
15 chronically ill or well, would use PHRs only if they see the usefulness of these artifacts. This is  
16  
17 concordant with findings on other empirical studies on PHRs that showed relative advantage[22]  
18  
19 or perception of empowerment[45] as key motivators of adoption.  
20  
21

22  
23 As expected from previous research,[17] the perception of Security, Privacy, and Trust in PHRs  
24  
25 is a significant motivator for use in both categories of individuals surveyed. Table 3 shows this  
26  
27 factor is second in terms of total effect to Perceived Usefulness only, being significant at  $P <$   
28  
29  $.001$  for both sub-samples. Interestingly, Security, Privacy, and Trust in PHRs has a non-  
30  
31 significant direct influence on Behavioral Intention to use PHRs for the Ill sub-sample  
32  
33 (coefficient =  $.140$ ,  $P = .15$ ). This means security, privacy and trust mean less for ill people – the  
34  
35 association of these features with usefulness is more important in the adoption equation. This is  
36  
37 confirmed by previous research showing that benefits of access to medical records online may  
38  
39 outweigh privacy risk perceptions.[46]  
40  
41  
42  
43  
44

45  
46 Study results confirm that Information Seeking and Personal IT Innovativeness are motivators of  
47  
48 PHR use for both categories of potential users while exerting their influence through Perceived  
49  
50 Usefulness (Table 3 and Figure 2). However, the total effect of Personal IT Innovativeness over  
51  
52 adoption intention is not significant for the Ill sub-sample, but it is for the Well sub-sample  
53  
54 (Table 3). This suggests that technical innovativeness means less for ill people than it does for  
55  
56  
57  
58  
59  
60

1  
2  
3 well people, indicating that ill people are less interested in adopting a PHR just because it is  
4  
5 innovative, but for other reasons, including the value it can provide in managing their disease(s).  
6  
7

8  
9 As hypothesized, Computer Anxiety is the only deterrent on PHR adoption in the theoretical  
10  
11 model proposed by this study. It has a negative total influence significant at  $P < .001$  for the Ill  
12  
13 sub-sample and at  $P = .01$  for the Well sub-sample (Table 3). Results in Figure 2 confirm that the  
14  
15 influence of Anxiety is less apparent for the Well sub-sample compared to the Ill sub-sample.  
16  
17 Therefore ill individuals, who presumably might be attracted to using PHRs, would be more  
18  
19 concerned about the skills necessary to access computer-based PHRs. Their concerns would  
20  
21 clearly have to be addressed in order to increase PHR adoption.  
22  
23  
24

25  
26 All demographic characteristics measured and reported in Table 1 were tested as control  
27  
28 variables but had no effect for either sample with the exception of participant interest in regularly  
29  
30 maintaining records about health. This factor was positive for both sub-samples but more so for  
31  
32 the Well one. Therefore, individual interest in self-monitoring health makes them better able to  
33  
34 perceive PHR usefulness and to want to use these systems.  
35  
36  
37

38  
39 Overall, the original model proposed by this study to explain the adoption of PHRs had  
40  
41 moderately high variance explained values for all the endogenous constructs, for both sub-  
42  
43 samples ( $R^2$  of 0.473/0.474 for Perceived Usefulness and 0.620/0.626 for Behavioral Intention)  
44  
45 and 6 out of 7 significant paths in both cases (Figure 2). Therefore, from the statistical point of  
46  
47 view, this model could be considered to be reasonably good.[47]  
48  
49  
50

#### 51 52 53 54 55 **Assessment of differences between ill and well individuals** 56 57

1  
2  
3 The key outcomes from the study of perceptions on PHRs of Ill and Well individuals in Table 4  
4 show that there were no statistically significant differences (at a level  $P < .05$ ) between the two  
5 sub-samples for any of the paths in Figure 2. On the surface, these outcomes appear to contradict  
6 what we had expected – that people with chronic illnesses or disabilities are more interested in  
7 PHR adoption than are well people. We suspect that the differences are masked by the fact that  
8 many of the people in the Ill sample were, in fact, not seriously ill. The low rate of current PHR  
9 use in the both sub-samples could be another explanation for the non-significant differences in  
10 perceptions between them. Findings from consumers, especially those with serious chronic  
11 illnesses, who had a considerable amount of experience with well-designed PHRs, might be  
12 more conclusive than the results from this comparative survey.  
13  
14  
15  
16  
17  
18  
19  
20  
21  
22  
23  
24  
25  
26  
27  
28  
29  
30

### 31 **Limitations**

32  
33  
34 As in virtually any empirical research, this study has some limitations. First, it is likely that the  
35 functionalities that accompany PHR systems would have a strong influence on their adoption.  
36 This aspect was not measured in this study. Second, the participants were all Internet users, so it  
37 excluded many, particularly older, consumers who were not. In fact more than 60% of the survey  
38 participants overall claimed to use the Internet for from 30 to 60 minutes per day. On the other  
39 hand, the proportion of Internet and portable device users falls off rapidly with age beyond 65  
40 years,[48] especially for lower income seniors. Therefore, “those who can benefit the most from  
41 a PHR system may be the least able to use it”.[49] In addition to all these limitations, the most  
42 important for a comparative study such as this, participant health conditions were self-reported  
43 and not diagnosed by practitioners. Therefore, it is possible that the difference we found in  
44  
45  
46  
47  
48  
49  
50  
51  
52  
53  
54  
55  
56  
57  
58  
59  
60

1  
2  
3 overall perceptions between the two sub-samples was not significant because the difference in  
4  
5 participant self-reported health condition between the two sub-samples was weak.  
6  
7  
8  
9

## 10 11 12 **CONCLUSIONS** 13

14  
15 Despite the inherent limitations of an exploratory study, this research has the merit of  
16  
17 investigating individual perceptions about electronic PHRs, using a rigorous theoretical approach  
18  
19 that considers the perspectives of ill and well people separately. While remaining parsimonious,  
20  
21 the theoretical model developed by this research has the merit of explaining a reasonably high  
22  
23 percent of the consumer intention to use electronic PHRs and thus could be a starting point for  
24  
25 researchers examining more complex models of eHealth adoption.  
26  
27  
28

29  
30 According to the findings of this research, to maximize the chances of adoption for PHR support  
31  
32 in self-management initiatives, it appears necessary to enhance the motivators, especially the  
33  
34 perceptions of usefulness as well as that of security, privacy and trust in PHRs, while mitigating  
35  
36 anxieties associated with computer use. Developers and implementers of electronic PHRs should  
37  
38 try to enhance the perceptions of positive factors among consumers, and focus on the benefits of  
39  
40 using these systems in particular, since favourable factors are far more important than deterrents  
41  
42 in the overall adoption equation.  
43  
44  
45

46  
47 A first exposure to PHRs did not reveal significantly different perceptions of this tool between  
48  
49 individuals who reported having a chronic illness and those who reported being well. Therefore  
50  
51 it appears that both categories of potential users should be addressed by promoters of PHRs in  
52  
53 much the same way in terms of motivating and demotivating factors. However, caution is  
54  
55  
56  
57  
58  
59  
60

1  
2  
3 advised regarding assumptions of equivalence between individuals who report being chronically  
4  
5 ill and those who have been diagnosed accordingly. Thus, future studies should attempt to survey  
6  
7 chronically ill patients recruited through the healthcare system, after having a specified  
8  
9 experience with self-managing their conditions with the aid of PHRs. A comparison of their  
10  
11 perceptions of PHRs with those of well individuals would help to improve our understanding of  
12  
13 how the adoption of PHRs could be increased overall.  
14  
15  
16  
17  
18  
19  
20  
21  
22  
23  
24  
25  
26  
27  
28  
29  
30  
31  
32  
33  
34  
35  
36  
37  
38  
39  
40  
41  
42  
43  
44  
45  
46  
47  
48  
49  
50  
51  
52  
53  
54  
55  
56  
57  
58  
59  
60

1  
2  
3 **Funding** This research was funded by a grant from the Canadian Institutes for Health Research.  
4  
5 This organization was not involved directly in the design or implementation of this study. This  
6  
7 article is solely the responsibility of the authors and does not necessarily represent the official  
8  
9 views of the Canadian Institutes of Health Research.  
10  
11

### 12 13 **Contributorship Statement:**

14  
15 Both authors

16  
17  
18  
19  
20 1) made substantial contributions to conception and design, acquisition of data, or analysis and  
21  
22 interpretation of data;  
23

24  
25 2) contributed to drafting the article or revising it critically for important intellectual content; and  
26

27  
28 3) gave final approval of the version to be published.  
29

30  
31  
32 **Competing interests** None.  
33

34  
35 **Ethics approval** Research Ethics Board of a Canadian university.  
36

37  
38 **Data sharing statement** No additional data available.  
39  
40

### 41 42 43 **Figure legends**

44  
45  
46  
47 **Figure 1** Theoretical model of PHR adoption

48  
49  
50  
51 **Figure 2** Path coefficients, significance levels and  $R^2$  values for the PHR adoption model (III  
52  
53 sub-sample numbers above the line and Well sub-sample numbers below the line)  
54  
55

## REFERENCES

1. Holman H, Lorig K. Patient self-management: a key to effectiveness and efficiency in care of chronic disease. *Public Health Reports* 2004;**119**:239-43.
2. Warsi A, Wang PS, LaValley MP, et al. Self-management education programs in chronic disease. *Arch Intern Med* 2004;**164**(15):1641-9. PMID: 15302634.
3. Weitzman ER, Kaci L, Mandl KD. Acceptability of a personally controlled health record in a community-based setting: implications for policy and design. *J Med Internet Res* 2009;**11**(2):e14. URL: <http://www.jmir.org/2009/2/e14/> doi: 10.2196/jmir.1187 PMID: 19403467.
4. Bodenheimer T, Wagner EH, Grumbach K. Improving chronic care for patients with chronic illness: the chronic care model, Part 2. *J Am Med Assoc* 2002;**16**(288):1909-14. PMID: 12377092.
5. Alphin S, Kjoller M, Davidsen M, et al. Self-reported ischemic heart disease: prevalence, sociodemographics, health behavior, health-care utilization, and quality of life. *Open J Prev Med* 2012;**2**(2):240-8.
6. Hess R, Bryce CL, Paone S, et al. Exploring challenges and potentials of personal health records in diabetes self-management: implementation and initial assessment. *Telemed J E Health* 2007;**13**(5):509-18.
7. Siminerio LM. The role of technology and the chronic care model. *J Diabetes Sci Technol* 2010;**4**(2):470-5.
8. Wiljer D, Urowitz S, Apatu E, et al. Patient accessible electronic health records: exploring recommendations for successful implementation strategies. *J Med Internet Res* 2008;**10**(4):e34. URL: <http://www.jmir.org/2008/4/e34/> doi: 10.2196/jmir.1061 PMID: 18974036.
9. Markle Foundation. The personal health working group final report 2003. URL:<http://research.policyarchive.org/15473.pdf>. Accessed: 2013-10-27. (Archived by WebCite® at <http://www.webcitation.org/6KhE3vwDS>).
10. Tang PC, Ash JS, Bates DW, et al. Personal health records: Definitions, benefits, and strategies for overcoming barriers to adoption. *J Am Med Inform Assoc* 2006 Mar-Apr;**13**(2):121-6. doi: 10.1197/jamia.M2025 PMID: 16357345.
11. Halamka JD, Mandl KD, Tang PC. Early experiences with personal health records. *J Am Med Inform Assoc* 2008 Jan-Feb;**15**(1):1-7. PMID: 17947615.
12. Eysenbach G. The law of attrition. *J Med Internet Res* 2005;**7**(1):e11. URL: <http://www.jmir.org/2005/1/e11/> doi: 10.2196/jmir.7.1.e11 PMID: 15829473.
13. Farvolden P, Denisoff E, Selby P, et al. Usage and longitudinal effectiveness of a web-based self-help cognitive behavioral therapy program for panic disorder. *J Med Internet Res* 2005;**7**(1):e7. URL: <http://www.jmir.org/2005/1/e7/> doi: 10.2196/jmir.7.1.e7 PMID: 15829479.
14. Etter JF. Comparing the efficacy of two Internet-based, computer-tailored smoking cessation programs: a randomized trial. *J Med Internet Res* 2005;**7**(1):e2. URL: <http://www.jmir.org/2005/1/e2/> doi: 10.2196/jmir.7.1.e2 PMID: 15829474.

15. Fielding D, Duff A. Compliance with treatment protocols: interventions for children with chronic illness. *Arch Dis Child* 1999 Feb;**80**(2):196-200. PMID: 10325743.
16. Shankar A, Conner M, Bodansky HJ. Can the theory of planned behaviour predict maintenance of a frequently repeated behaviour? *Psychol Health Med*. 2007 Mar;**12**(2):213-224. PMID: 17365901.
17. Markle Foundation. Americans overwhelmingly believe electronic personal health records could improve their health 2008. URL: <http://www.markle.org/sites/default/files/ResearchBrief-200806.pdf>. Accessed: 2013-10-27. (Archived by WebCite® at <http://www.webcitation.org/67gKru0S3>).
18. Lafky DB, Horan TA. Prospective personal health record use among different user groups: results of a multi-wave study. Hawaii International Conference on System Sciences, Proceedings of the 41st Annual, Hawaii, U.S.A, 7-10 Jan. 2008. doi: 10.1109/HICSS.2008.363.
19. King DK, Toobert DJ, Portz JD, et al. What patients want: relevant health information technology for diabetes self-management. *Health and Technology* 2012;**2**:147-157. doi: 10.1007/s12553-012-0022-7.
20. Benhamou PY. Improving diabetes management with electronic health records and patients' health records. *Diabetes Metab* 2011 Dec;**37** Suppl 4:S53-S56. doi: 10.1016/S1262-3636(11)70966-1. PMID: 22208711.
21. Gilmour H. Social participation and the health and well-being of Canadian seniors. *Health Rep* 2012 Dec;**23**(4):23-32. PMID: 23356042.
22. Emani S, Yamin CK, Peters E, et al. Patient perceptions of a personal health record: a test of the Diffusion of Innovation model. *J Med Internet Res* 2012;**14**(6):e150. URL: <http://www.jmir.org/2012/6/e150/> doi: 10.2196/jmir.2278 PMID: 23128775.
23. Strull WM, Lo B, Charles G. Do patients want to participate in medical decision making? *J Am Med Assoc*, 1984 Dec 7;**252**(21):2990-4. PMID: 6502860.
24. Agarwal R, Prasad J. A conceptual and operational definition of personal innovativeness in the domain of information technology. *Information Systems Research* 1998;**9**(2):204-15.
25. Simonson MR, Maurer M, Montag-Torardi M, et al. Development of a standardized test of computer literacy and a computer anxiety index. *Journal of Educational Computing Research* 1987;**3**(2):231-247.
26. Igbaria M, Schiffman SJ, Wieckowski TJ. The respective roles of perceived usefulness and perceived fun in the acceptance of microcomputer technology. *Behaviour and Information Technology* 1994;**13**(6):349-61.
27. Venkatesh V, Morris MG, Davis GB, et al. User acceptance of information technology: Toward a unified view. *MIS Quarterly* 2003;**27**(3):425-478.
28. Wen KY, Kreps G, Zhu F, et al. Consumers' perceptions about and use of the Internet for personal health records and health information exchange: analysis of the 2007 Health Information National Trends survey. *J Med Internet Res* 2010;**12**(4):e73. URL: <http://www.jmir.org/2010/4/e73/> doi: 10.2196/jmir.1668 PMID: 21169163.
29. CHCF. Consumers and health information technology: a national survey 2010. URL:<http://www.chcf.org/publications/2010/04/consumers-and-health-information-technology-a-national-survey>. Accessed: 2013-10-27. (Archived by WebCite® at <http://www.webcitation.org/6Ki6wprfO>).



- 1  
2  
3  
4  
5  
6  
7  
8  
9  
10  
11  
12  
13  
14  
15  
16  
17  
18  
19  
20  
21  
22  
23  
24  
25  
26  
27  
28  
29  
30  
31  
32  
33  
34  
35  
36  
37  
38  
39  
40  
41  
42  
43  
44  
45  
46  
47  
48  
49  
50  
51  
52  
53  
54  
55  
56  
57  
58  
59  
60
30. Hassol A, Walker JM, Kidder D, et al. Patient experiences and attitudes about access to a patient electronic health care record and linked Web messaging. *J Am Med Inform Assoc* 2004 Nov-Dec;**11**(6):505-13. PMID: 15299001.
  31. Walker J, Ahern DK, Le LX, et al. Insights for internists: "I want the computer to know who I am". *J Gen Intern Med* 2009 Jun;**24**(6):727-32. doi: 10.1007/s11606-009-0973-1 PMID: 19412641.
  32. Davis F. Perceived usefulness, perceived ease of use, and user acceptance of information technology. *MIS Quarterly* 1989;**13**(3):319-40.
  33. Wilson EV, Lankton NK. Modeling patients' acceptance of provider-delivered e-health. *J Am Med Inform Assoc*. 2004 Jul-Aug;**11**(4):241-8. PMID: 15064290.
  34. Bontis N, Crossan MM, Hulland J. Managing an organizational learning system by aligning stocks and flows. *Journal of Management Studies* 2002;**39**(4):437-69.
  35. Thomas RD, Lu IRR, Cedzynski M. Partial least squares: a critical review and a potential alternative. 2005 Administrative Sciences Association of Canada Conference, Toronto, Ontario, Canada.  
URL:<http://citeseerx.ist.psu.edu/viewdoc/download?doi=10.1.1.86.1719&rep=rep1&type=pdf>. Accessed: 2013-10-28. (Archived by WebCite® at <http://www.webcitation.org/6Ki8UyHTh>).
  36. Ringle CM, Wende S, Will, A. SmartPLS 2.0 (M3) Beta; 2005.  
URL:<http://www.smartpls.de/forum>. Accessed: 2013-10-28. (Archived by WebCite® at <http://www.webcitation.org/5uZLmc5cJ>).
  37. Gefen D, Straub D. A practical guide to factorial validity using PLS-Graph: tutorial and annotated example. *Communications of the Association for Information Systems* 2005;**16**:91-109.
  38. Jarvenpaa SL, Shaw TR, Staples DS. Toward contextualized theories of trust: the role of trust in global virtual teams. *Information Systems Research* 2004 September;**15**(3):250-267.
  39. Ahuja MK, Thatcher, JB. Moving beyond intentions and toward the theory of trying: effects of work environment and gender on post-adoption information technology use. *MIS Quarterly* 2005 Sep; **29**(3):427-59.
  40. Archer N, Cocosila M. A comparison of physician pre-adoption and adoption views on Electronic Health Records in Canadian medical practices. *J Med Internet Res* 2011;**13**(3):e57. URL: <http://www.jmir.org/2011/3/e57/> doi: 10.2196/jmir.1726 PMID: 21840835.
  41. Chin WW. Frequently asked questions - Partial Least Squares & PLS-Graph; 2000. URL: <http://disc-nt.cba.uh.edu/chin/plsfaq/plsfaq.htm>. Accessed: 2013-10-28. (Archived by WebCite® at <http://www.webcitation.org/5uZMSOxrz>).
  42. Bontis N. National intellectual capital index: a United Nations initiative for the Arab region. *Journal of Intellectual Capital* 2004;**5**(1):13-39.
  43. Fornell C, Larcker, DF. Evaluating structural equation models with unobservable variables and measurement error. *Journal of Marketing Research* 1981;**18**(1):39-50.
  44. Venkatesh V, Speier C, Morris MG. User acceptance enablers in individual decision making about technology: toward an integrated model. *Decision Sciences* 2002;**33**(2):297-316.

- 1  
2  
3  
4 45. Agarwal R, Anderson C, Zarate J, et al. If we offer it, will they accept? Factors affecting  
5 patient use intentions of personal health records and secure messaging  
6 J Med Internet Res 2013;**15**(2):e43. URL: <http://www.jmir.org/2013/2/e43/>  
7 doi: 10.2196/jmir.2243 PMID: 23470453.
- 8 46. Vodicka E, Mejilla R, Leveille SG, et al. Online access to doctors' notes: patient concerns  
9 about privacy. J Med Internet Res 2013;**15**(9):e208. URL:  
10 <http://www.jmir.org/2013/9/e208/> doi: 10.2196/jmir.2670 PMID: 24072335.
- 11 47. Bontis N, Keow WCC, Richardson S. Intellectual capital and business performance in  
12 Malaysian industries. Journal of Intellectual Capital 2000;**1**(1):85-100.
- 13 48. Pew Internet. Mobile Health 2012. Pew Internet Research Center 2012.  
14 URL:<http://pewinternet.org/Reports/2012/Mobile-Health.aspx>. Accessed: 2013-10-28.  
15 (Archived by WebCite® at <http://www.webcitation.org/6Ki9MnKwz>).
- 16 49. Kim EH, Stolyar A, Lober WB, et al. Challenges to using an electronic personal health  
17 record by a low-income elderly population. J Med Internet Res 2009;**11**(4):e44. URL:  
18 <http://www.jmir.org/2009/4/e44/> doi: 10.2196/jmir.1256 PMID: 19861298.  
19  
20  
21  
22  
23  
24  
25  
26  
27  
28  
29  
30  
31  
32  
33  
34  
35  
36  
37  
38  
39  
40  
41  
42  
43  
44  
45  
46  
47  
48  
49  
50  
51  
52  
53  
54  
55  
56  
57  
58  
59  
60

1  
2  
3  
4  
5  
6  
7  
8  
9  
10  
11  
12  
13  
14  
15  
16  
17  
18  
19  
20  
21  
22  
23  
24  
25  
26  
27  
28  
29  
30  
31  
32  
33  
34  
35  
36  
37  
38  
39  
40  
41  
42  
43  
44  
45  
46  
47  
48  
49  
50  
51  
52  
53  
54  
55  
56  
57  
58  
59  
60

**Research Article**

**Title:**

Perceptions of Chronically Ill and Healthy Consumers about Electronic Personal Health Records:  
A Comparative Empirical Investigation

**Corresponding Author:**

Mihail Cocosila, PhD

Faculty of Business  
Athabasca University  
1 University Drive  
Athabasca, AB T9S 3A3  
Canada  
Phone: 1-780-675-6100  
Fax: 1-780-675-6437  
Email: mihailc@athabascau.ca

**Authors:**

Mihail Cocosila<sup>1</sup>, PhD; Norm Archer<sup>2</sup>, PhD

<sup>1</sup>Faculty of Business, Athabasca University, Athabasca, Alberta, Canada

<sup>2</sup>DeGroot School of Business, McMaster University, Hamilton, Ontario, Canada

**Keywords:**

Personal Health Record, information technology, adoption, self-management, Canada

**Word count:**

~~3662~~ 4208 words (excluding ~~pt~~ tables)

0

1  
2  
3  
4  
5  
6  
7  
8  
9  
10  
11 **Perceptions of Chronically Ill and Healthy Consumers about Electronic Personal Health**  
12 **Records: A Comparative Empirical Investigation**  
13

14  
15  
16  
17  
18 **ABSTRACT**  
19

20 **Objective** To develop a model of consumer perceptions of electronic personal health records  
21 (PHRs) and accomplish-validate it in a comparative study of the perceptions of electronic  
22 personal health records (PHRs) between consumers who reported having a chronic illness or  
23 disability and those who reported being well.  
24  
25  
26  
27

28 **Materials and methods** A model of PHR use motivators and barriers was built and tested  
29 through a national survey was conducted with an Internet panel recruited across Canada. Data  
30 were collected from 800 individuals 18 years or older. Half reported having a chronic illness or  
31 disability and half reported being well. Analyses were done with Structural Equation Modeling  
32 techniques.  
33  
34  
35  
36  
37

38 **Results** A total of 389 valid answers from chronically ill and 383 from well participants were  
39 collected. We found Perceived Usefulness to be was the key explanation of the intention to use  
40 PHRs for both ill and well people (total effect of .601 and .565, respectively) followed by  
41 Security, Privacy, and Trust in PHRs (total effect of .377 and .479, respectively). Conversely,  
42 Computer Anxiety was perceived as a significant barrier (total effect of -.327 for ill individuals  
43 and -.212 for well individuals).  
44  
45  
46  
47  
48  
49  
50  
51  
52  
53  
54  
55  
56  
57  
58  
59  
60

1  
2  
3  
4  
5  
6  
7  
8  
9 **Discussion** The model proposed was appropriate in explaining key consumer positive and  
10 negative perceptions. Key motivators and barriers for user adoption of on electronic PHR uses  
11 that were identified are broadly in concordance with previous knowledge in behavioral research.

12  
13  
14 We found little difference in perceptions of electronic PHRs between chronically ill and well  
15 individuals, although self-reporting their health status might have influenced the results.

16  
17  
18 **Conclusions** To increase the adoption rate of electronic PHRs among both chronically ill and  
19 well consumers it is necessary to reinforce consumer perceptions of the usefulness of and  
20 trust in these eHealth technologies while mitigating their anxieties about computer use  
21 in general.  
22  
23  
24  
25  
26  
27  
28

### 29 **Strengths and limitations of this study**

- 30  
31
- 32 • This study developed an unbiased theoretical model of consumer perceptions of  
33 electronic personal health records (PHRs).
  - 34 • The model was validated through an empirical is-research comparing empirically the  
35 perceptions of chronically ill and well consumers about electronic PHRs using a rigorous  
36 theoretical approach.
  - 37 • The health condition of study participants was self-reported and not diagnosed by  
38 practitioners.  
39  
40  
41  
42  
43  
44  
45  
46  
47  
48  
49  
50  
51  
52  
53  
54  
55  
56  
57  
58  
59  
60

## OBJECTIVE

Given the current shortage of medical resources available for managing the growing numbers of patients with chronic illnesses, it is becoming apparent that patient self-management is key to managing such illnesses and improving health and quality of life. [1, 2] ~~If health self-management is to function successfully, care plans and goals must be developed jointly by patients and their physicians, to move towards improved health and quality of life. [2] But to~~ manage this process effectively, ~~as in every management system,~~ it is important for patients to maintain/keep patient up-to-date and readily accessible health records ~~that can assist the patient and the patient's healthcare provider to monitor the patient's progress towards meeting the established self-care goals. It is also important to make these records readily accessible to both patients and their providers, in order that integration of care and sharing of information can occur both within and across services.~~ [1, 3] An online health self-management system that is grounded in the chronic care model [4] and that utilizes the patient's health record as a repository can support a system with self-management functionalities for assisting in improved patient-centered care. [5-8]

~~When h~~Health records ~~are~~ maintained and accessible by individual ~~patients, these records~~ consumers are referred to as Personal Health Records (PHRs). Although they can be recorded and maintained in paper form, a fast emerging trend with the advent of digital data and the Internet is to keep them in an electronic format. Therefore, we will assume throughout this paper that PHRs refer to electronic records on digital media. A PHR can be defined as "An electronic application through which individuals can access, manage and share their health information, and

1  
2  
3  
4  
5  
6  
7  
8  
9 that of others for whom they are authorized, in a private, secure, and confidential  
10 environment".[9] This is in contrast with EHR/EMRs (Electronic Health Records/Electronic  
11 Medical Records) which contain patient data gathered during the course of patient visits to  
12 healthcare providers, and are managed solely by healthcare providers or healthcare institutions.  
13  
14 Also, most EHR/EMR data are based on acute care episodes[10] since people are more likely to  
15 see their doctors when they have an acute problem.  
16  
17  
18  
19

20  
21 An ideal form of a PHR is one that exchanges data freely, as authorized by the patient and  
22 physician, between the physician's EHR/EMR and the patient's records, as needed.[11] ~~Types of~~  
23 ~~data that may be available in this way to a PHR include, but are not limited to: patient problem~~  
24 ~~lists, procedures, major illnesses, provider list, allergies, home monitored data (e.g., blood~~  
25 ~~pressure, glucose level, weight, exercise schedule, etc.), family history, lifestyle, immunizations,~~  
26 ~~medications, and lab tests.[10]~~  
27  
28  
29  
30  
31  
32

33 In theory, PHRs can be of great use to patients in the self-management of chronic diseases and  
34 disabilities, but there are significant obstacles to their sustainability, which refers to their  
35 adoption and continued use. Trials of eHealth implementations tend to be prone to participant  
36 dropouts, ~~or~~ (attrition).[12] Reported attrition rates from the use of PHRs for health self-  
37 management vary widely, from as low as 3% for an interactive web-based intervention that  
38 included telephone counseling, to 65% in a smoking cessation program, and to an enormous rate  
39 of 99% in a panic disorder self-help program.[13, 14] Although factors affecting attrition tend to  
40 be complex,[15] they must be addressed effectively if the benefits of self-management  
41 interventions are to be maximized.  
42  
43  
44  
45  
46  
47  
48  
49  
50  
51  
52  
53  
54  
55  
56  
57  
58  
59  
60

1  
2  
3  
4  
5  
6  
7  
8  
9 The goal of better health may not be sufficient to motivate people to use PHRs, although there  
10 are techniques to predict in advance whether patients will adopt and continue with beneficial  
11 healthcare behaviors.[16] If patient motivation to adopt PHR innovations were better understood,  
12 resulting reductions in attrition rates would lead to improved outcomes from health self-  
13 management interventions.  
14  
15  
16  
17  
18

19 Accordingly, the objective of this study is to ~~help~~ determine ~~the the key~~ motivators and barriers  
20 ion of for individuals to adopt PHRs, ~~for the purpose of self-management of chronic ailments and~~  
21 ~~disabilities.~~ As There are indications that people with serious chronic ailments and disabilities  
22 are more likely to be favorable to the adoption of PHRs than people who are well.<sup>9</sup> ~~Therefore,~~  
23 ~~in our study~~ we then compared these two groups of people empirically to determine possible  
24 differences between adoption factors. the factors by which chronically ill or disabled people are  
25 more motivated to adopt PHRs than well individuals. Finally, we discuss the results and their  
26 significance to further sustainable development and implementation of PHRs, and consumer  
27 motivation to adopt and use them.  
28  
29  
30  
31  
32  
33  
34  
35  
36  
37  
38

## 39 BACKGROUND AND SIGNIFICANCE

### 40 Personal Health Records background

41  
42  
43  
44 Studies done in various parts of the world have indicated a great deal of public interest in PHRs.  
45  
46 For instance, a major motivation for over 70% of U.S. consumers is that they believe having  
47 access to PHRs would improve the quality of their healthcare,[17] although as yet there is no  
48 convincing evidence that this is the case. Field studies report the greatest interest in PHRs is  
49  
50  
51  
52  
53  
54  
55  
56  
57  
58  
59  
60



1  
2  
3  
4  
5  
6  
7  
8  
9 manifested by the chronically ill, frequent users of healthcare, and caregivers for elderly  
10 parents.[9,18] The same studies show that, among American consumers saying they were not  
11 interested in using PHRs, more than 55% indicated that worries about privacy and confidentiality  
12 affected their reluctance. Moreover, about 90% of consumers surveyed felt that the provision of  
13 privacy, record access, and user remedies would be significant factors affecting their agreement  
14 to use an online PHR service.[17] Conversely, some barriers to maintaining and accessing PHRs  
15 include cost and loss of interest over time.[19]

16  
17  
18  
19  
20  
21  
22 Through online and decision support for patient-centered care, changes in healthcare practice can  
23 often help to meet practice and patient goals. For example, research has demonstrated  
24 improvements in diabetes outcomes and chronic illness self-management when behavioral  
25 support is forthcoming from relevant technologies, improving dietary practices, physical activity,  
26 and adherence to medication regimens.[20] Other studies indicate that social activities are  
27 particularly important for older people, with health benefits that may include less chance of  
28 mortality, disability, and depression, and better cognitive and health-related behaviors.[21]  
29 Empirical studies have shown that relative advantage, ease of use, trialability, perceptions of  
30 privacy and security, age, and computer experience were positive predictors of the value of  
31 PHRs for supporting communications with the doctor's office.[22] Therefore, it is important to  
32 understand the key motivators and deterrents for PHR adoption, with the target of improving the  
33 adoption rate and sustainability of these systems.  
34  
35  
36  
37  
38  
39  
40  
41  
42  
43  
44  
45  
46  
47  
48

#### 49 **Theoretical model and hypotheses**

50  
51  
52  
53  
54  
55  
56  
57  
58  
59  
60

1  
2  
3  
4  
5  
6  
7  
8  
9 In the following, we develop a theoretical model that takes into account the above considerations  
10  
11 [and test it](#) for chronically ill and disabled consumers on the one hand [and](#) with consumers who  
12 feel that they are relatively healthy on the other hand, in order to compare their perceptions of  
13  
14 PHRs. For [this purpose](#) we use a number of key constructs validated by previous research in  
15  
16 information systems and healthcare, and propose hypotheses regarding their relationships, based  
17  
18 on empirical findings and theoretical reasoning.  
19

20  
21 *Information Seeking.* Although patients may prefer not to make all their own decisions about  
22 their healthcare, they do want to be kept informed. Reportedly, over 40 percent of patients with  
23 chronic conditions prefer to receive more information from their healthcare providers than they  
24  
25 actually received.<sup>[23]</sup> It seems, therefore, that patients with higher information seeking  
26  
27 preferences are more likely to feel that PHRs are useful in accessing information on their health  
28  
29 status than those who do not. Therefore, we propose the following hypothesis:  
30  
31

32  
33 *H1: Consumers with higher information-seeking preferences will tend to believe that PHRs*  
34  
35 *would be more useful.*

36  
37 *Personal Information Technology Innovativeness.* This construct captures the willingness of an  
38 individual to try out an information technology, as it relates to the concept of technology  
39  
40 acceptance.<sup>[24]</sup> This indicates that people exhibiting high levels of information technology  
41  
42 innovativeness will be more interested in accepting PHRs than those who do not. This leads to  
43  
44 the hypothesis:  
45  
46

47  
48 *H2: Individuals with higher levels of IT innovativeness will exhibit higher levels of perceived*  
49  
50 *usefulness for PHRs.*

1  
2  
3  
4  
5  
6  
7  
8  
9 *Computer Anxiety.* This construct expresses an individual's apprehension or fear when faced  
10 with the possibility of using a computer.[25] Previous research has found a negative relationship  
11 between computer anxiety and perceived usefulness of new technology, as well as to intention to  
12 use a new technology.[26, 27] This results in the following propositions:  
13  
14

15  
16  
17 *H3: Level of computer anxiety will be negatively related to the perceived usefulness of PHRs.*

18  
19  
20 *H4: Level of computer anxiety will be negatively related to the intention to use PHRs.*

21  
22 *Privacy, Security, and Trust.* These concepts have been consistently found in large scale studies  
23 to have an impact on consumer interest in online PHR adoption.[28] While some surveys showed  
24 two-thirds of adult consumers were concerned about security and privacy of their health  
25 data,[17] other market studies found that consumers actually using a PHR did not worry too  
26 much about its privacy implications.[29] The chronically and acutely ill and others who often  
27 require healthcare appear to have fewer concerns about privacy than do health professionals.[30,  
28  
29  
30  
31  
32  
33  
34  
35  
36  
37  
38  
39  
40  
41  
42  
43  
44  
45  
46  
47  
48  
49  
50  
51  
52  
53  
54  
55  
56  
57  
58  
59  
60

31] Consequently, we propose the following hypotheses:

36 | *H5: Consumer perceptions of appropriate security and privacy of PHRs, and trust in PHR*  
37 | *providers will positively affect their perceptions of PHR usefulness.*

41 | *H6: Consumer perceptions of appropriate security and privacy of PHRs, and trust in PHR*  
42 | *providers will positively affect their intention to adopt PHRs.*

45 *Perceived Usefulness.* This construct is a widely known and strong extrinsic motivator of  
46 technology use. It expresses "the degree to which a person believes that using a particular system  
47 would enhance his or her job performance".[32] In the case of PHR use, job performance

1  
2  
3  
4  
5  
6  
7  
8  
9  
10  
11  
12  
13  
14  
15  
16  
17  
18  
19  
20  
21  
22  
23  
24  
25  
26  
27  
28  
29  
30  
31  
32  
33  
34  
35  
36  
37  
38  
39  
40  
41  
42  
43  
44  
45  
46  
47  
48  
49  
50  
51  
52  
53  
54  
55  
56  
57  
58  
59  
60

(expectancy) would refer to being able to self-monitor accurately certain health parameters.

Thus, it is logical to formulate the hypothesis below:

*H7: Higher perceived usefulness for PHRs leads to a higher level of intention to adopt this technology.*

The proposed constructs and their related hypotheses are shown in Figure 1 in the form of a theoretical model of PHR adoption. The final endogenous construct of this model is Behavioral Intention to adopt PHRs that measures potential user intentions regarding this eHealth support tool.

\*\*\* Insert Figure 1 here. \*\*\*

**Figure 1** Theoretical Model of PHR Adoption

## MATERIALS AND METHODS

### Participant recruitment and data collection

The theoretical model proposed by this study was tested with empirical data collected through an online survey of Canadian consumers. Both French and English versions were prepared and pre-tested with graduate students and practitioners in a Canadian university. The full scale survey was approved by the Research Ethics Board of the university and subsequently conducted with a Canadian Internet panel of consumers through a market research company. [There is no relationship between the researchers and this company, and the company was not allowed to analyze nor retain any copies of the data collected during the survey.](#)

1  
2  
3  
4  
5  
6  
7  
8  
9 Participants were required to be at least 18 years old and willing to report their health condition.

10 Participants were provided detailed descriptions of a chronic illness condition and of its typical  
11 degrees of severity: mild, moderate and severe. 800 of the participants who had pre-registered  
12 with the market research company participated in the experiment: the sample was stratified to  
13 select exactly 400 who reported a chronic illness or disability at various levels of severity, and  
14 exactly 400 who did not report such a condition. These two strata will be indicated in the  
15 remainder of this study as 'Ill' and 'Well'.

16  
17  
18  
19  
20  
21  
22 All participants were presented a detailed description of an electronic Patient Health Record  
23 system and then asked to answer an online questionnaire. ~~This The comprised~~ questions it  
24 contained were meant to measure the multi-item latent variables in the theoretical model  
25 described in Figure 1, together with relevant demographic characteristics of the participants  
26 surveyed. Most of the survey questions were adapted from those validated by previous research  
27 in healthcare (*e.g., Information Seeking*)[33] and information systems (*e.g., Personal*  
28 *Information Technology Innovativeness, Computer Anxiety, Perceived Usefulness and*  
29 *Behavioral Intention*)[24, 27, 32] Measures for the only formative construct in the model,  
30 *Security, Privacy and Trust*, although initially sourced from separate constructs in relevant  
31 information systems literature, were designed and validated as describing a single variable for  
32 this research. Measurement scales are included in Appendix A. All responses were collected on  
33 7-point Likert scales ranging from Strongly Disagree (1) to Strongly Agree (7), with an  
34 additional Not Applicable option. Cases with more than 10% missing answers were deemed as  
35 invalid and removed from the data analysis.

36  
37  
38  
39  
40  
41  
42  
43  
44  
45  
46  
47  
48  
49  
50  
51  
52  
53  
54  
55  
56  
57  
58  
59  
60

Formatted: Font: Not Italic

Formatted: Font: Not Italic

Formatted: Font: 12 pt, Not Bold, Italic, Font color: Auto

Formatted: Font: 12 pt, Not Bold, Font color: Auto

Formatted: Font: 12 pt, Not Bold, Italic, Font color: Auto

Formatted: Font: 12 pt, Italic

Formatted: Font: 12 pt

Formatted: Font: Italic

### Theoretical model evaluation

As this research was intended mainly for exploratory purposes, data analysis was done with Partial Least Squares (PLS) due to the suitability of this Structural Equation Modeling methodology for complex exploratory models,[34] using formative indicators[35] such as the Security, Privacy and Trust construct used in this research. PLS analysis was carried out with the SmartPLS software tool[36] and included two successive model assessments: measurement tests (assessing the reliability and validity of the construct measures), followed by structural tests (evaluating the relationships between model constructs).[37] Each analysis for the two sub-samples (Ill and Well) was done separately using the same model.

Use of the PLS tool for analysis determined imposed the minimum study sample size. As the study involves a complex formative construct (i.e., Security, Privacy and Trust), the sample size should be at least ten times the number of its indicators.[38] Furthermore, sample size should account for possible high non-response rates or invalid cases in health-related studies. These considerations led to the target number of 400 respondents targeted in each of the two sub-samples.

Formatted: Font: (Default) Times New Roman

### Assessment of differences between ill and well individuals

Results of theoretical model tests for the two sub-samples were compared through differences in terms of the values of the path coefficients determined provided by PLS analysis. [38] The degree of difference was assessed with the *t*-statistic with  $N1+N2-2$  degrees of freedom,[39-41] where:

$$t = (Path1 - Path2) / [Spooled * \sqrt{(1/N1 + 1/N2)}]$$

Here,  $Path1$ ,  $Path2$  are the corresponding path coefficients in the model results and  $N1$ ,  $N2$  are the respective sub-sample sizes.

$Spooled$  represents the pooled estimator for the variance and is calculated from:

$$Spooled = \sqrt{\left\{ \frac{\text{square of } (N1-1)}{(N1 + N2-2)} * \text{square of } SE1 + \left[ \frac{\text{square of } (N2-1)}{(N1 + N2-2)} * \text{square of } SE2 \right] \right\}}$$

Here  $SE1$ ,  $SE2$  are the standard errors of the corresponding path coefficients in the two sub-sample model results.

## RESULTS

### Characteristics of study participants

After removing the invalid cases with more than 10% missing answers, a total of 389 Ill cases and 383 Well cases remained and were used in further statistical analyses. Raw data analyzed in this study were part of a larger project conducted in this setting. Table 1 shows comparative demographic characteristics, summarized for the two strata.

**Table 1** Participant characteristics

|                      |        | Ill Participants | Well Participants |
|----------------------|--------|------------------|-------------------|
| Sample size          |        | 389              | 383               |
| Age (years, average) |        | 52.5             | 46.5              |
| Gender               |        |                  |                   |
|                      | Female | 248 (63.7%)      | 221 (57.7%)       |
|                      | Male   | 141 (36.3%)      | 162 (42.3%)       |

|                                                                                                                            |                 |             |             |
|----------------------------------------------------------------------------------------------------------------------------|-----------------|-------------|-------------|
| <b>Subject maintains up-to-date PHRs on paper</b>                                                                          |                 |             |             |
|                                                                                                                            | Yes             | 132 (34.0%) | 74 (19.2%)  |
|                                                                                                                            | No              | 257 (66.0%) | 309 (80.8%) |
| <b>Subject maintains up-to-date electronic PHRs</b>                                                                        |                 |             |             |
|                                                                                                                            | Yes             | 46 (11.7%)  | 22 (5.8%)   |
|                                                                                                                            | No              | 343 (88.3%) | 361 (94.2%) |
| <b>Number of visits with a doctor during past 6 months (average)</b>                                                       |                 | 5.0         | 2.3         |
| <b>Number of doctors seen during past 6 months (average)</b>                                                               |                 | 2.3         | 1.4         |
| <b>Number of children 12 years old or younger for whom they have main care responsibility at home (average)</b>            |                 | 0.2         | 0.3         |
| <b>Subject (or someone for whom they are responsible) has a chronic disease that requires continuing medical attention</b> |                 |             |             |
|                                                                                                                            | Yes             | 308 (79.2%) | 81 (21.2%)  |
|                                                                                                                            | No              | 81 (20.8%)  | 302 (78.8%) |
| <b>Subject (or someone for whom they are responsible) has a disability that requires continuing care</b>                   |                 |             |             |
|                                                                                                                            | Yes             | 205 (52.7%) | 42 (11.0%)  |
|                                                                                                                            | No              | 184 (47.3%) | 341 (89.0%) |
| <b>Subject is caring for elderly person(s)</b>                                                                             |                 |             |             |
|                                                                                                                            | Yes             | 49 (12.6%)  | 21 (5.5%)   |
|                                                                                                                            | No              | 340 (87.4%) | 362 (94.5%) |
| <b>Subject is interested in regularly maintaining records about health</b>                                                 |                 |             |             |
|                                                                                                                            | Yes             | 323 (83.0%) | 247 (64.4%) |
|                                                                                                                            | No              | 66 (17.0%)  | 136 (35.6%) |
| <b>Average amount of time spent using the Internet at home daily (largest two categories out of five)</b>                  |                 |             |             |
|                                                                                                                            | 31 - 60 minutes | 263 (67.7%) | 222 (58.0%) |
|                                                                                                                            | 11 - 30 minutes | 99 (25.5%)  | 111 (29.0%) |

### Theoretical model evaluation

An initial evaluation of the *measurement model* that comprised 22 items indicated the necessity of dropping 2 items when running it with the Ill data sample and 3 items when running it with

Formatted: Font: Italic



the Well data sample, because of unsatisfactory significance and loading values of these items.

After re-running SmartPLS for the remaining items, all reflective constructs for both samples displayed Cronbach's alpha and composite reliability values above 0.7, Average Variance Extracted (AVE) values above 0.5, and item loadings above 0.7, while the remaining items of the formative construct Security, Privacy and Trust in PHR were significant and had loadings above 0.5. Thus, the measurement model was considered to have acceptable reliability and convergent validity for both sub-samples.[38 ,42, 43]

A visual inspection of a matrix having the square root of AVEs on the diagonal and the correlations between all reflective constructs in the off diagonal cells showed diagonal numbers to be larger than all numbers on the corresponding rows and columns for both sub-samples (Table 2). This led to the conclusion that the model's reflective constructs had sufficient discriminant validity for both sub-samples.[37] Consequently, the measurement tests of the model for both sub-samples indicated adequate reliability and construct validity for all measurement instruments, either adapted from previous research or developed by this study. This allowed the second step of the PLS process, which was to perform the structural analysis of the model.

**Table 2** Reflective construct correlations and square root of AVEs (Ill sample numbers off parentheses and Well sample numbers in parentheses)

|                             | <b>Computer Anxiety</b> | <b>Behavioral Intention</b> | <b>Information Seeking</b> | <b>Perceived Usefulness</b> | <b>Personal IT Innovativeness</b> |
|-----------------------------|-------------------------|-----------------------------|----------------------------|-----------------------------|-----------------------------------|
| <b>Computer Anxiety</b>     | <b>0.89 (0.91)</b>      |                             |                            |                             |                                   |
| <b>Behavioral Intention</b> | -0.51 (-0.38)           | <b>0.87 (0.93)</b>          |                            |                             |                                   |
| <b>Information Seeking</b>  | -0.13 (-0.13)           | 0.27 (0.24)                 | <b>0.86 (0.88)</b>         |                             |                                   |

|                            |               |             |             |                    |                    |
|----------------------------|---------------|-------------|-------------|--------------------|--------------------|
| Perceived Usefulness       | -0.47 (-0.31) | 0.76 (0.75) | 0.33 (0.34) | <b>0.92 (0.92)</b> |                    |
| Personal IT Innovativeness | -0.33 (-0.17) | 0.46 (0.38) | 0.07 (0.03) | 0.39 (0.42)        | <b>0.92 (0.94)</b> |

Evaluation of the *structural model* involved running SmartPLS with a bootstrap of 200 re-samples. Results for path coefficients, their significance levels, and the values of  $R^2$  are compared in Figure 2 for both sub-samples.

Formatted: Font: Italic

\*\*\* Insert Figure 2 here. \*\*\*

**Figure 2** Path coefficients, significance levels and  $R^2$  values for the PHR adoption model (Ill sub-sample numbers above the line and Well sub-sample numbers below the line)

SmartPLS results also provided the total effects of the factors in the theoretical model on behavioral intention to use PHRs, for the two categories of participants (Table 3).

**Table 3** Total effects and their significance levels on behavioral intention to adopt PHRs

| Antecedent Construct         | Ill Sample  |         | Well Sample |         |
|------------------------------|-------------|---------|-------------|---------|
|                              | Coefficient | P-value | Coefficient | P-value |
| Computer Anxiety             | -.327       | <.001   | -.212       | .01     |
| Information Seeking          | .118        | .01     | .141        | .01     |
| Perceived Usefulness         | .601        | <.001   | .565        | <.001   |
| Personal IT Innovativeness   | .100        | .08     | .162        | .01     |
| Security, Privacy, and Trust | .377        | <.001   | .479        | <.001   |

1  
2  
3  
4  
5  
6  
7  
8  
9 All characteristics in Table 1 were tested as potential control variables. In the case of the PHR III  
10 sub-sample the only influence came from the factor '*subject is interested in regularly*  
11 *maintaining records about health*'. This factor influenced positively the Perceived Usefulness  
12 construct (path coefficient of .234 at a  $P = .02$  significance level) and increased the variance  
13 explained by this construct from  $R^2 = 0.473$  to  $R^2 = 0.521$ ). In the case of the PHR Well sub-  
14 sample the same interest in regularly maintaining records about health influenced positively the  
15 Perceived Usefulness construct (path coefficient of .171 at a  $P = .04$  significance level and  
16 increased the variance explained from  $R^2 = 0.474$  to  $R^2 = 0.499$ ). In addition for this sub-sample,  
17 the factor increased Behavioral Intention (path coefficient of .154 at a  $P = .03$  significance level  
18 and increase of variance explained from  $R^2 = 0.620$  to  $R^2 = 0.640$ ). So, the results for the control  
19 variable '*subject is interested in regularly maintaining records about health*' played a significant  
20 role in both sub-samples.  
21  
22  
23  
24  
25  
26  
27  
28  
29  
30

31  
32 The self-reported degree of severity of the chronic illness or condition (i.e., mild, moderate or  
33 severe) was tested as a possible control variable for the III sub-sample. No statistically significant  
34 effects on the theoretical model were noticed.  
35  
36  
37  
38  
39

#### 40 **Assessment of differences between ill and well individuals**

41  
42  
43 The results of the differences between the path coefficients of the model for the two sub-samples  
44 are presented jointly in Table 4. No  $P$ -values were calculated since the lack of statistical  
45 significance, at a level of probability  $P < .05$ , of the difference between the results from the two  
46 sub-samples (indicated by the low absolute  $t$ -value of the difference) is very clear.  
47  
48  
49  
50

**Table 4** Statistical analysis of differences between Ill and Well consumer sub-samples

| Path                                                | Ill Sub-sample Path Coefficient | Well Sub-sample Path Coefficient | Absolute <i>t</i> -value of Difference |
|-----------------------------------------------------|---------------------------------|----------------------------------|----------------------------------------|
| Computer Anxiety → Behavioral Intention             | -.177                           | -.142                            | 0.348                                  |
| Computer Anxiety → Perceived Usefulness             | -.249                           | -.123                            | 1.021                                  |
| Information Seeking → Perceived Usefulness          | .196                            | .249                             | 0.479                                  |
| Perceived Usefulness → Behavioral Intention         | .601                            | .565                             | 0.255                                  |
| Personal IT Innovativeness → Perceived Usefulness   | .167                            | .287                             | 0.982                                  |
| Security, Privacy, and Trust → Behavioral Intention | .140                            | .244                             | 0.717                                  |
| Security, Privacy, and Trust → Perceived Usefulness | .393                            | .416                             | 0.161                                  |

## DISCUSSION

### Principal findings and comparison with prior work

The objective of this study was to determine the key motivators for individuals to adopt

electronic Personal Health Records, through a theoretical behavioral model [developed here](#).

[Furthermore](#), ~~As~~ previous research and theoretical reasoning indicated that people with chronic illnesses may be more likely to be favorable to the adoption of PHRs than people who are well,<sup>[9]</sup> in our study we [use the model we developed to](#) compare two sub-samples drawn in Canada from these two populations in order to assess empirically the possible behavioral differences and their determinants.

Our study (Table 3 and Figure 2) confirms [largely](#) the findings ~~of an overwhelming body~~ of research in information systems according to which Perceived Usefulness is the key explanation

1  
2  
3  
4  
5  
6  
7  
8  
9 of the behavioral intention to use an information technology application.[44] Therefore  
10 individuals, either chronically ill or well, would use PHRs only if they see the usefulness of these  
11 artifacts. This is concordant with findings on other empirical studies on PHRs that showed  
12 relative advantage[22] or perception of empowerment[45] as key motivators of adoption.  
13  
14

15  
16  
17 As expected from previous research,[17] the perception of Security, Privacy, and Trust in PHRs  
18 is a significant motivator for use in both categories of individuals surveyed. Table 3 shows this  
19 factor is second in terms of total effect to Perceived Usefulness only, being significant at  $P <$   
20  $.001$  for both sub-samples. Interestingly, Security, Privacy, and Trust in PHRs has a non-  
21 significant direct influence on Behavioral Intention to use PHRs for the Ill sub-sample  
22 (coefficient = .140,  $P = .15$ ). This means security, privacy and trust mean less for ill people – the  
23 association of these features with usefulness is more important in the adoption equation. This is  
24 confirmed by previous research showing that benefits of access to medical records online may  
25 outweigh privacy risk perceptions.[46]  
26  
27

28  
29  
30 Study results confirm that Information Seeking and Personal IT Innovativeness are motivators of  
31 PHR use for both categories of potential users while exerting their influence through Perceived  
32 Usefulness (Table 3 and Figure 2). However, the total effect of Personal IT Innovativeness over  
33 adoption intention is not significant for the Ill sub-sample, but it is for the Well sub-sample  
34 (Table 3). This suggests that technical innovativeness means less for ill people than it does for  
35 well people, indicating that ill people are less interested in adopting a PHR just because it is  
36 innovative, but for other reasons, including the value it can provide in managing their disease(s).  
37  
38

39  
40  
41 As hypothesized, Computer Anxiety is the only deterrent on PHR adoption in the theoretical  
42 model proposed by this study. It has a negative total influence significant at  $P < .001$  for the Ill  
43  
44  
45  
46  
47  
48  
49  
50  
51

1  
2  
3  
4  
5  
6  
7  
8  
9  
10  
11  
12  
13  
14  
15  
16  
17  
18  
19  
20  
21  
22  
23  
24  
25  
26  
27  
28  
29  
30  
31  
32  
33  
34  
35  
36  
37  
38  
39  
40  
41  
42  
43  
44  
45  
46  
47  
48  
49  
50  
51  
52  
53  
54  
55  
56  
57  
58  
59  
60

sub-sample and at  $P = .01$  for the Well sub-sample (Table 3). Results in Figure 2 confirm that the influence of Anxiety is less apparent for the Well sub-sample compared to the Ill sub-sample.

Therefore ill individuals, who, presumably, might be attracted to using PHRs, would be more concerned about the skills necessary to access computer-based PHRs. Their concerns would clearly have to be addressed in order to increase PHR adoption.

All demographic characteristics measured and reported in Table 1 were tested as control variables but had no effect for either sample with the exception of participant interest in regularly maintaining records about health. This factor was positive for both sub-samples but more so for the Well one. Therefore, individual interest in self-monitoring health makes them better able to perceive PHR usefulness and to want to use these systems.

Overall, the original model proposed by this study to explain the adoption of PHRs had moderately high variance explained values for all the endogenous constructs, for both sub-samples ( $R^2$  of 0.473/0.474 for Perceived Usefulness and 0.620/0.626 for Behavioral Intention) and 6 out of 7 significant paths in both cases (Figure 2). Therefore, from the statistical point of view, this model could be considered to be reasonably good.[47]

#### Assessment of differences between ill and well individuals

The key outcomes from the study of perceptions on PHRs of Ill and Well individuals are in Table 4, which shows that there were no statistically significant differences (at a level  $P < .05$ ) between the two Ill and Well sub-samples for any of the paths in Figure 2. On the surface, these outcomes appear to contradict what we had expected – that people with chronic illnesses or

1  
2  
3  
4  
5  
6  
7  
8  
9 disabilities are more interested in PHR adoption than are well people. We suspect that the  
10 differences are masked by the fact that many of the people in the Ill sample were, in fact, not  
11 seriously ill. The low rate of current PHR use in the both sub-samples could be another  
12 explanation for the non-significant differences in perceptions between them. Findings from  
13 consumers, especially those with serious chronic illnesses, who had a considerable amount of  
14 experience with well-designed PHRs, might be more conclusive than the results from this  
15 comparative survey.  
16  
17  
18  
19  
20  
21

## 22 23 24 25 **Limitations**

26  
27  
28 As [in](#) virtually any empirical research, this study has ~~also~~ some limitations. First, it is likely that  
29 the functionalities that accompany PHR systems would have a strong influence on their adoption.  
30 This aspect was not measured in this study. Second, the participants were all Internet users, so it  
31 excluded many, particularly older, consumers who were not. In fact more than 60% of the survey  
32 participants overall claimed to use the Internet for from 30 to 60 minutes per day. On the other  
33 hand, the proportion of Internet and portable device users falls off rapidly with age beyond 65  
34 years,[48] especially for lower income seniors. Therefore, “those who can benefit the most from  
35 a PHR system may be the least able to use it”.[49] In addition to all these limitations, the most  
36 important for a comparative study such as this, participant health conditions were self-reported  
37 and not diagnosed by practitioners. Therefore, it is possible that the difference we found in  
38 overall perceptions between the two sub-samples was not significant because the difference in  
39 participant self-reported health condition between the two sub-samples was weak.  
40  
41  
42  
43  
44  
45  
46  
47  
48  
49  
50

1  
2  
3  
4  
5  
6  
7  
8  
9  
10  
11  
12  
13  
14  
15  
16  
17  
18  
19  
20  
21  
22  
23  
24  
25  
26  
27  
28  
29  
30  
31  
32  
33  
34  
35  
36  
37  
38  
39  
40  
41  
42  
43  
44  
45  
46  
47  
48  
49  
50  
51  
52  
53  
54  
55  
56  
57  
58  
59  
60

## CONCLUSIONS

Despite the inherent limitations of an exploratory study, this research has the merit of investigating individual perceptions about electronic PHRs, using a rigorous theoretical approach that considers the perspectives of ill and well people separately. While remaining parsimonious, the theoretical model developed by this research has the merit of explaining a reasonably high percent of the consumer intention to use electronic PHRs and, thus, could be a starting point for researchers examining more complex models of eHealth adoption.

According to the findings of this research, To maximize the chances of adoption for PHR support in self-management initiatives, it appears necessary to enhance the motivators, especially the perceptions of usefulness as well as that of security, privacy and trust in PHRs, while mitigating anxieties associated with computer use. Developers and implementers of electronic PHRs should try to enhance the perceptions of the positive factors among consumers, and focus on the benefits of using these systems in particular, since the favourable factors are far more important than the deterrents in the overall adoption equation.

A first exposure to PHRs did not reveal significantly different perceptions of this tool between individuals who reported having a chronic illness and those who reported being well. Therefore it appears that both categories of potential users should be addressed by promoters of PHRs in much the same way in terms of motivating and demotivating factors. However, caution is advised regarding assumptions of equivalence between individuals who report being chronically ill and those who have been diagnosed accordingly. Thus, future studies should attempt to survey



1  
2  
3  
4  
5  
6  
7  
8  
9 chronically ill patients recruited through the healthcare system, after having a specified  
10 experience with self-managing their conditions with the aid of PHRs. A comparison of their  
11 perceptions of PHRs with those of well individuals would help to improve our understanding of  
12 how the adoption of PHRs could be increased overall.  
13  
14  
15  
16  
17  
18  
19

20 **Funding** This research was funded by a grant from the Canadian Institutes for Health Research.  
21 This organization was not involved directly in the design or implementation of this study. This  
22 article is solely the responsibility of the authors and does not necessarily represent the official  
23 views of the Canadian Institutes of Health Research.  
24  
25  
26  
27  
28  
29

30 **Competing interests** None.  
31  
32  
33  
34

35 **Ethics approval** Research Ethics Board of a Canadian university.  
36  
37  
38  
39

40 **Data sharing statement** No additional data available.  
41  
42  
43  
44

## 45 REFERENCES

- 46 1. Holman H, Lorig, K. Patient self-management: a key to effectiveness and efficiency in  
47 care of chronic disease. Public Health Reports 2004;**119**:239-43.
- 48 2. Warsi A, Wang PS, LaValley MP, et al. Self-management education programs in chronic  
49 disease. Arch Intern Med 2004;**164**(15):1641-9. PMID: 15302634.  
50  
51

3. Weitzman ER, Kaci L, Mandl KD. Acceptability of a personally controlled health record in a community-based setting: implications for policy and design. *J Med Internet Res* 2009;**11**(2):e14. URL: <http://www.jmir.org/2009/2/e14/> doi: 10.2196/jmir.1187 PMID: 19403467.
4. Bodenheimer T, Wagner EH, Grumbach K. Improving chronic care for patients with chronic illness: the chronic care model, Part 2. *J Am Med Assoc* 2002;**16**(288):1909-14. PMID: 12377092.
5. Alphin S, Kjoller M, Davidsen M, et al. Self-reported ischemic heart disease: prevalence, sociodemographics, health behavior, health-care utilization, and quality of life. *Open J Prev Med* 2012;**2**(2):240-8.
6. Hess R, Bryce CL, Paone S, et al. Exploring challenges and potentials of personal health records in diabetes self-management: implementation and initial assessment. *Telemed J E Health* 2007;**13**(5):509-18.
7. Siminerio LM. The role of technology and the chronic care model. *J Diabetes Sci Technol* 2010;**4**(2):470-5.
8. Wiljer D, Urowitz S, Apatu E, et al. Patient accessible electronic health records: exploring recommendations for successful implementation strategies. *J Med Internet Res* 2008;**10**(4):e34. URL: <http://www.jmir.org/2008/4/e34/> doi: 10.2196/jmir.1061 PMID: 18974036.
9. Markle Foundation. The personal health working group final report 2003. URL:<http://research.policyarchive.org/15473.pdf>. Accessed: 2013-10-27. (Archived by WebCite® at <http://www.webcitation.org/6KhE3vwDS>).
10. Tang PC, Ash JS, Bates DW, et al. Personal health records: Definitions, benefits, and strategies for overcoming barriers to adoption. *J Am Med Inform Assoc* 2006 Mar-Apr;**13**(2):121-6. doi: 10.1197/jamia.M2025 PMID: 16357345.
11. Halamka JD, Mandl KD, Tang PC. Early experiences with personal health records. *J Am Med Inform Assoc* 2008 Jan-Feb;**15**(1):1-7. PMID: 17947615.
12. Eysenbach G. The law of attrition. *J Med Internet Res* 2005;**7**(1):e11. URL: <http://www.jmir.org/2005/1/e11/> doi: 10.2196/jmir.7.1.e11 PMID: 15829473.
13. Farvolden P, Denisoff E, Selby P, et al. Usage and longitudinal effectiveness of a web-based self-help cognitive behavioral therapy program for panic disorder. *J Med Internet Res* 2005;**7**(1):e7. URL: <http://www.jmir.org/2005/1/e7/> doi: 10.2196/jmir.7.1.e7 PMID: 15829479.
14. Etter JF. Comparing the efficacy of two Internet-based, computer-tailored smoking cessation programs: a randomized trial. *J Med Internet Res* 2005;**7**(1):e2. URL: <http://www.jmir.org/2005/1/e2/> doi: 10.2196/jmir.7.1.e2 PMID: 15829474.
15. Fielding D, Duff A. Compliance with treatment protocols: interventions for children with chronic illness. *Arch Dis Child* 1999 Feb;**80**(2):196-200. PMID: 10325743.
16. Shankar A, Conner M, Bodansky HJ. Can the theory of planned behaviour predict maintenance of a frequently repeated behaviour? *Psychol Health Med*. 2007 Mar;**12**(2):213-224. PMID: 17365901.
17. Markle Foundation. Americans overwhelmingly believe electronic personal health records could improve their health 2008. URL: <http://www.markle.org/sites/default/files/ResearchBrief-200806.pdf>. Accessed: 2013-10-27. (Archived by WebCite® at <http://www.webcitation.org/67gKru0S3>).

18. Lafky DB, Horan TA. Prospective personal health record use among different user groups: results of a multi-wave study. Hawaii International Conference on System Sciences, Proceedings of the 41st Annual, Hawaii, U.S.A, 7-10 Jan. 2008. doi: 10.1109/HICSS.2008.363.
19. King DK, Toobert DJ, Portz JD, et al. What patients want: relevant health information technology for diabetes self-management. *Health and Technology* 2012;**2**:147-157. doi: 10.1007/s12553-012-0022-7.
20. Benhamou PY. Improving diabetes management with electronic health records and patients' health records. *Diabetes Metab* 2011 Dec;**37** Suppl 4:S53-S56. doi: 10.1016/S1262-3636(11)70966-1. PMID: 22208711.
21. Gilmour H. Social participation and the health and well-being of Canadian seniors. *Health Rep* 2012 Dec;**23**(4):23-32. PMID: 23356042.
22. Emani S, Yamin CK, Peters E, et al. Patient perceptions of a personal health record: a test of the Diffusion of Innovation model. *J Med Internet Res* 2012;**14**(6):e150. URL: <http://www.jmir.org/2012/6/e150/> doi: 10.2196/jmir.2278 PMID: 23128775.
23. Strull WM, Lo B, Charles G. Do patients want to participate in medical decision making? *J Am Med Assoc*, 1984 Dec 7;**252**(21):2990-4. PMID: 6502860.
24. Agarwal R, Prasad J. A conceptual and operational definition of personal innovativeness in the domain of information technology. *Information Systems Research* 1998;**9**(2):204-15.
25. Simonson MR, Maurer M, Montag-Torardi M, et al. Development of a standardized test of computer literacy and a computer anxiety index. *Journal of Educational Computing Research* 1987;**3**(2):231-247.
26. Igbaria M, Schiffman SJ, Wieckowski TJ. The respective roles of perceived usefulness and perceived fun in the acceptance of microcomputer technology. *Behaviour and Information Technology* 1994;**13**(6):349-61.
27. Venkatesh V, Morris MG, Davis GB, et al. User acceptance of information technology: Toward a unified view. *MIS Quarterly* 2003;**27**(3):425-478.
28. Wen KY, Kreps G, Zhu F, et al. Consumers' perceptions about and use of the Internet for personal health records and health information exchange: analysis of the 2007 Health Information National Trends survey. *J Med Internet Res* 2010;**12**(4):e73. URL: <http://www.jmir.org/2010/4/e73/> doi: 10.2196/jmir.1668 PMID: 21169163.
29. CHCF. Consumers and health information technology: a national survey 2010. URL:<http://www.chcf.org/publications/2010/04/consumers-and-health-information-technology-a-national-survey>. Accessed: 2013-10-27. (Archived by WebCite® at <http://www.webcitation.org/6Ki6wprfO>).
30. Hassol A, Walker JM, Kidder D, et al. Patient experiences and attitudes about access to a patient electronic health care record and linked Web messaging. *J Am Med Inform Assoc* 2004 Nov-Dec;**11**(6):505-13. PMID: 15299001.
31. Walker J, Ahern DK, Le LX, et al. Insights for internists: "I want the computer to know who I am". *J Gen Intern Med* 2009 Jun;**24**(6):727-32. doi: 10.1007/s11606-009-0973-1 PMID: 19412641.
32. Davis F. Perceived usefulness, perceived ease of use, and user acceptance of information technology. *MIS Quarterly* 1989;**13**(3):319-40.

33. Wilson EV, Lankton NK. Modeling patients' acceptance of provider-delivered e-health. *J Am Med Inform Assoc.* 2004 Jul-Aug;**11**(4):241-8. PMID: 15064290.
34. Bontis N, Crossan MM, Hulland J. Managing an organizational learning system by aligning stocks and flows. *Journal of Management Studies* 2002;**39**(4):437-69.
35. Thomas RD, Lu IRR, Cedzynski M. Partial least squares: a critical review and a potential alternative. 2005 Administrative Sciences Association of Canada Conference, Toronto, Ontario, Canada.  
URL:<http://citeseerx.ist.psu.edu/viewdoc/download?doi=10.1.1.86.1719&rep=rep1&type=pdf>. Accessed: 2013-10-28. (Archived by WebCite® at <http://www.webcitation.org/6Ki8UyHTh>).
36. Ringle CM, Wende S, Will, A. SmartPLS 2.0 (M3) Beta; 2005.  
URL:<http://www.smartpls.de/forum>. Accessed: 2013-10-28. (Archived by WebCite® at <http://www.webcitation.org/5uZLmc5cJ>).
37. Gefen D, Straub D. A practical guide to factorial validity using PLS-Graph: tutorial and annotated example. *Communications of the Association for Information Systems* 2005;**16**:91-109.
38. Jarvenpaa SL, Shaw TR, Staples DS. Toward contextualized theories of trust: the role of trust in global virtual teams. *Information Systems Research* 2004 September;**15**(3):250-267.
39. Ahuja MK, Thatcher, JB. Moving beyond intentions and toward the theory of trying: effects of work environment and gender on post-adoption information technology use. *MIS Quarterly* 2005 Sep; **29**(3):427-59.
40. Archer N, Cocosila M. A comparison of physician pre-adoption and adoption views on Electronic Health Records in Canadian medical practices. *J Med Internet Res* 2011;**13**(3):e57. URL: <http://www.jmir.org/2011/3/e57/> doi: 10.2196/jmir.1726 PMID: 21840835.
41. Chin WW. Frequently asked questions - Partial Least Squares & PLS-Graph; 2000. URL: <http://disc-nt.cba.uh.edu/chin/plsfaq/plsfaq.htm>. Accessed: 2013-10-28. (Archived by WebCite® at <http://www.webcitation.org/5uZMSOxrz>).
42. Bontis N. National intellectual capital index: a United Nations initiative for the Arab region. *Journal of Intellectual Capital* 2004;**5**(1):13-39.
43. Fornell C, Larcker, DF. Evaluating structural equation models with unobservable variables and measurement error. *Journal of Marketing Research* 1981;**18**(1):39-50.
44. Venkatesh V, Speier C, Morris MG. User acceptance enablers in individual decision making about technology: toward an integrated model. *Decision Sciences* 2002;**33**(2):297-316.
45. Agarwal R, Anderson C, Zarate J, et al. If we offer it, will they accept? Factors affecting patient use intentions of personal health records and secure messaging *J Med Internet Res* 2013;**15**(2):e43. URL: <http://www.jmir.org/2013/2/e43/> doi: 10.2196/jmir.2243 PMID: 23470453.
46. Vodicka E, Mejilla R, Leveille SG, et al. Online access to doctors' notes: patient concerns about privacy. *J Med Internet Res* 2013;**15**(9):e208. URL: <http://www.jmir.org/2013/9/e208/> doi: 10.2196/jmir.2670 PMID: 24072335.
47. Bontis N, Keow WCC, Richardson S. Intellectual capital and business performance in Malaysian industries. *Journal of Intellectual Capital* 2000;**1**(1):85-100.

48. Pew Internet. Mobile Health 2012. Pew Internet Research Center 2012. URL:<http://pewinternet.org/Reports/2012/Mobile-Health.aspx>. Accessed: 2013-10-28. (Archived by WebCite® at <http://www.webcitation.org/6Ki9MnKwz>).

49. Kim EH, Stolyar A, Lober WB, et al. Challenges to using an electronic personal health record by a low-income elderly population. *J Med Internet Res* 2009;**11**(4):e44. URL: <http://www.jmir.org/2009/4/e44/> doi: 10.2196/jmir.1256 PMID: 19861298.

**APPENDIX A**

**Measurement scales**

*Information Seeking*

I believe that doctors should explain the purpose of laboratory and other tests.

I believe that the results of laboratory and other tests should be made available to patients.

I believe that people should know all the important side effects of their medications.

*Personal Information Technology Innovativeness*

If I hear about a new information technology I look for ways to experiment with it.

Among my friends I am usually the first to try out new information technologies.

In general, I am eager to try out new information technologies.

*Computer Anxiety*

I would feel apprehensive about using an Electronic Personal Health Record system.

Formatted: Font: Times New Roman, 12 pt

Formatted: Normal

Formatted: Normal, Line spacing: Double

Formatted: Font: 12 pt, Not Bold, Italic, No underline

Formatted: None, Space Before: 0 pt, After: 10 pt, Line spacing: Double

Formatted: Font: 12 pt, Not Bold

Formatted: Line spacing: Double

Formatted: Font: 12 pt, Not Bold

Formatted: Font: 12 pt, Not Bold, Italic, No underline

Formatted: None, Space Before: 0 pt, After: 10 pt, Line spacing: Double

Formatted: Font: 12 pt, Not Bold

Formatted: Line spacing: Double

Formatted: Font: 12 pt, Not Bold

Formatted: Font: 12 pt, Not Bold, Italic, No underline

Formatted: None, Space Before: 0 pt, After: 10 pt, Line spacing: Double

Formatted: Font: 12 pt, Not Bold

1  
2  
3  
4  
5  
6  
7  
8  
9  
10  
11  
12  
13  
14  
15  
16  
17  
18  
19  
20  
21  
22  
23  
24  
25  
26  
27  
28  
29  
30  
31  
32  
33  
34  
35  
36  
37  
38  
39  
40  
41  
42  
43  
44  
45  
46  
47  
48  
49  
50  
51  
52  
53  
54  
55  
56  
57  
58  
59  
60

It scares me to think that I could lose a lot of information using an Electronic Personal Health

Record system by hitting the wrong key.

Using an Electronic Personal Health Record system would make me nervous.

Formatted: Line spacing: Double

Formatted: Font: 12 pt, Not Bold

*Security, Privacy and Trust*

Formatted: Font: 12 pt, Not Bold, Italic, No underline

From a security and privacy perspective I would prefer to maintain up-to-date electronic personal

Formatted: Font: 12 pt, Not Bold

health records on a system that:

Formatted: None, Space Before: 0 pt, After: 10 pt, Line spacing: Double

Ran strictly on my own personal computer.

Ran strictly on my own personal computer, with provision to take the records with me on a

secure memory device, such as a smart card, as needed.

Is accessible through a secure Internet web site that is maintained by the provincial government's

health authority.

Is accessible through a secure Internet web site that is maintained by my own family doctor.

Is accessible through a secure Internet web site that is maintained by a private company.

Formatted: Line spacing: Double

Formatted: Font: 12 pt, Not Bold

*Perceived Usefulness*

Formatted: Font: 12 pt, Not Bold, Italic, No underline

Using my own Electronic Personal Health Records would help to support critical aspects of my

Formatted: None, Space Before: 0 pt, After: 10 pt, Line spacing: Double, Don't keep with next

health care such as scheduling appointments, recording my health status, etc.

Formatted: Font: 12 pt, Not Bold

1  
2  
3  
4  
5  
6  
7  
8  
9 Using my own Electronic Personal Health Records would enhance my effectiveness in managing  
10 my own health care, such as managing medications, reviewing my progress, etc.

11  
12  
13 Using my own Electronic Personal Health Records would make me more effective in providing  
14 up-to-date health information about myself when interacting with my physician.

15  
16  
17 Using my own Electronic Personal Health Records would help to improve my health.

18  
19  
20 Overall, having my own Electronic Personal Health Record system would be useful in managing ←  
21 my health care.

Formatted: Line spacing: Double

22  
23  
24  
25  
26  
27  
28 *Behavioural Intention to Adopt an ePHR*

Formatted: Font: 12 pt, Not Bold

Formatted: Font: 12 pt, Not Bold, Italic, No underline

29  
30 If an Electronic Personal Health Record system is made available for me, I intend to use it. ←

Formatted: Font: 12 pt, Not Bold

Formatted: None, Space Before: 0 pt, After: 10 pt, Line spacing: Double

31  
32  
33 If an Electronic Personal Health Record system is made available for me, I predict that I would  
34 use it.

35  
36  
37 If an Electronic Personal Health Record system is made available for me, I intend to work ←  
38 together with my spouse or other caregiver(s) to use it on my behalf.

Formatted: Normal, Line spacing: Double

1  
2  
3  
4  
5  
6  
7  
8  
9  
10  
11  
12  
13  
14  
15  
16  
17  
18  
19  
20  
21  
22  
23  
24  
25  
26  
27  
28  
29  
30  
31  
32  
33  
34  
35  
36  
37  
38  
39  
40  
41  
42  
43  
44  
45  
46  
47  
48  
49  
50  
51  
52  
53  
54  
55  
56  
57  
58  
59  
60

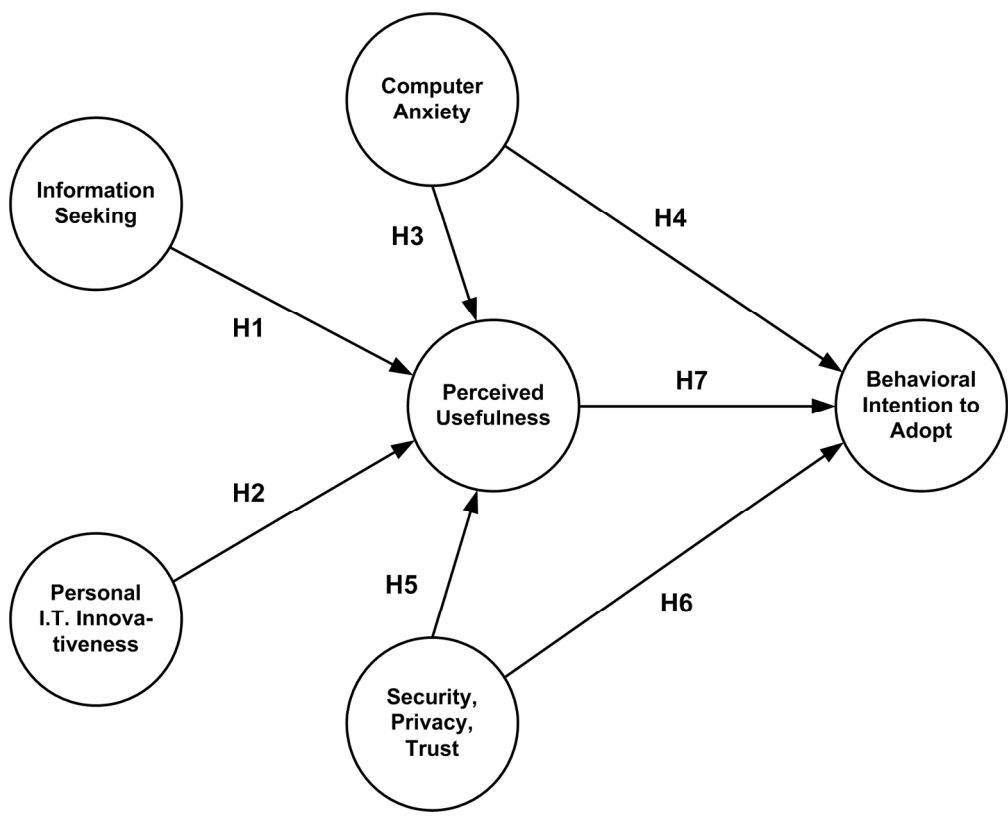

Figure 1 Theoretical model of PHR adoption  
163x130mm (300 x 300 DPI)

ew only



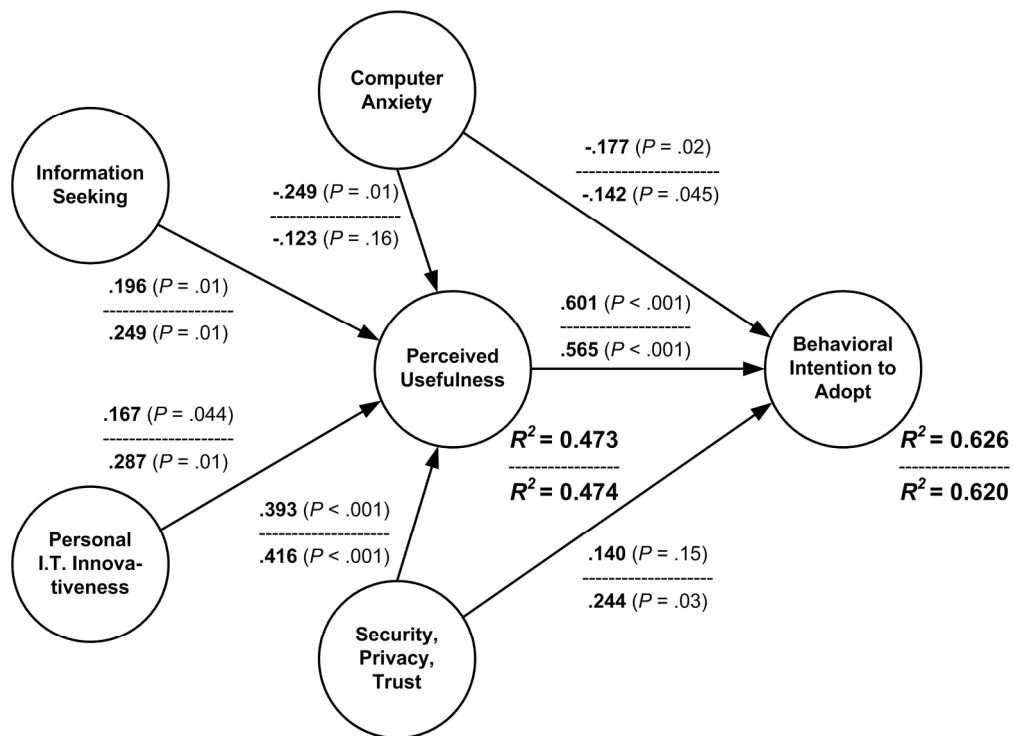

Figure 2 Path coefficients, significance levels and R2 values for the PHR adoption model (Ill sub-sample numbers above the line and Well sub-sample numbers below the line)  
179x130mm (300 x 300 DPI)

1  
2  
3 **APPENDIX A**

4  
5 **Measurement scales**

6  
7  
8 *Information Seeking*

9  
10  
11 I believe that doctors should explain the purpose of laboratory and other tests.

12  
13 I believe that the results of laboratory and other tests should be made available to patients.

14  
15 I believe that people should know all the important side effects of their medications.

16  
17  
18  
19  
20  
21 *Personal Information Technology Innovativeness*

22  
23  
24 If I hear about a new information technology I look for ways to experiment with it.

25  
26 Among my friends I am usually the first to try out new information technologies.

27  
28 In general, I am eager to try out new information technologies.

29  
30  
31  
32  
33 *Computer Anxiety*

34  
35  
36  
37 I would feel apprehensive about using an Electronic Personal Health Record system.

38  
39 It scares me to think that I could lose a lot of information using an Electronic Personal Health  
40 Record system by hitting the wrong key.

41  
42 Using an Electronic Personal Health Record system would make me nervous.

43  
44  
45  
46  
47 *Security, Privacy and Trust*

48  
49  
50 From a security and privacy perspective I would prefer to maintain up-to-date electronic personal  
51 health records on a system that:

52  
53  
54 Ran strictly on my own personal computer.

1  
2  
3 Ran strictly on my own personal computer, with provision to take the records with me on a  
4 secure memory device, such as a smart card, as needed.  
5

6  
7 Is accessible through a secure Internet web site that is maintained by the provincial government's  
8 health authority.  
9

10 Is accessible through a secure Internet web site that is maintained by my own family doctor.

11 Is accessible through a secure Internet web site that is maintained by a private company.  
12  
13

### 14 15 16 17 *Perceived Usefulness* 18

19  
20 Using my own Electronic Personal Health Records would help to support critical aspects of my  
21 health care such as scheduling appointments, recording my health status, etc.  
22

23 Using my own Electronic Personal Health Records would enhance my effectiveness in managing  
24 my own health care, such as managing medications, reviewing my progress, etc.  
25

26 Using my own Electronic Personal Health Records would make me more effective in providing  
27 up-to-date health information about myself when interacting with my physician.  
28

29 Using my own Electronic Personal Health Records would help to improve my health.  
30

31 Overall, having my own Electronic Personal Health Record system would be useful in managing  
32 my health care.  
33  
34  
35  
36  
37

### 38 *Behavioural Intention to Adopt an ePHR* 39

40  
41 If an Electronic Personal Health Record system is made available for me, I intend to use it.  
42

43 If an Electronic Personal Health Record system is made available for me, I predict that I would  
44 use it.  
45

46 If an Electronic Personal Health Record system is made available for me, I intend to work  
47 together with my spouse or other caregiver(s) to use it on my behalf.  
48  
49  
50  
51  
52  
53  
54  
55  
56  
57  
58  
59  
60

STROBE 2007 (v4) Statement—Checklist of items that should be included in reports of *cross-sectional studies*

| Section/Topic                | Item # | Recommendation                                                                                                                                                                       | Reported on page # |
|------------------------------|--------|--------------------------------------------------------------------------------------------------------------------------------------------------------------------------------------|--------------------|
| Title and abstract           | 1      | (a) Indicate the study's design with a commonly used term in the title or the abstract                                                                                               | 1                  |
|                              |        | (b) Provide in the abstract an informative and balanced summary of what was done and what was found                                                                                  | 1, 2               |
| <b>Introduction</b>          |        |                                                                                                                                                                                      |                    |
| Background/rationale         | 2      | Explain the scientific background and rationale for the investigation being reported                                                                                                 | 3-6                |
| Objectives                   | 3      | State specific objectives, including any prespecified hypotheses                                                                                                                     | 6-9                |
| <b>Methods</b>               |        |                                                                                                                                                                                      |                    |
| Study design                 | 4      | Present key elements of study design early in the paper                                                                                                                              | 9, 10              |
| Setting                      | 5      | Describe the setting, locations, and relevant dates, including periods of recruitment, exposure, follow-up, and data collection                                                      | 9, 10              |
| Participants                 | 6      | (a) Give the eligibility criteria, and the sources and methods of selection of participants                                                                                          | 9                  |
| Variables                    | 7      | Clearly define all outcomes, exposures, predictors, potential confounders, and effect modifiers. Give diagnostic criteria, if applicable                                             | 10                 |
| Data sources/<br>measurement | 8*     | For each variable of interest, give sources of data and details of methods of assessment (measurement). Describe comparability of assessment methods if there is more than one group | 10                 |
| Bias                         | 9      | Describe any efforts to address potential sources of bias                                                                                                                            | 9                  |
| Study size                   | 10     | Explain how the study size was arrived at                                                                                                                                            | 9                  |
| Quantitative variables       | 11     | Explain how quantitative variables were handled in the analyses. If applicable, describe which groupings were chosen and why                                                         | 10, 11             |
| Statistical methods          | 12     | (a) Describe all statistical methods, including those used to control for confounding                                                                                                | 10, 11             |
|                              |        | (b) Describe any methods used to examine subgroups and interactions                                                                                                                  | 10,11              |
|                              |        | (c) Explain how missing data were addressed                                                                                                                                          | 11                 |
|                              |        | (d) If applicable, describe analytical methods taking account of sampling strategy                                                                                                   |                    |
|                              |        | (e) Describe any sensitivity analyses                                                                                                                                                |                    |
| <b>Results</b>               |        |                                                                                                                                                                                      |                    |

|                          |     |                                                                                                                                                                                                              |        |
|--------------------------|-----|--------------------------------------------------------------------------------------------------------------------------------------------------------------------------------------------------------------|--------|
| Participants             | 13* | (a) Report numbers of individuals at each stage of study—eg numbers potentially eligible, examined for eligibility, confirmed eligible, included in the study, completing follow-up, and analysed            | 11     |
|                          |     | (b) Give reasons for non-participation at each stage                                                                                                                                                         | 11     |
|                          |     | (c) Consider use of a flow diagram                                                                                                                                                                           |        |
| Descriptive data         | 14* | (a) Give characteristics of study participants (eg demographic, clinical, social) and information on exposures and potential confounders                                                                     | 12     |
|                          |     | (b) Indicate number of participants with missing data for each variable of interest                                                                                                                          | 11     |
| Outcome data             | 15* | Report numbers of outcome events or summary measures                                                                                                                                                         | 12     |
| Main results             | 16  | (a) Give unadjusted estimates and, if applicable, confounder-adjusted estimates and their precision (eg, 95% confidence interval). Make clear which confounders were adjusted for and why they were included | 14, 15 |
|                          |     | (b) Report category boundaries when continuous variables were categorized                                                                                                                                    |        |
|                          |     | (c) If relevant, consider translating estimates of relative risk into absolute risk for a meaningful time period                                                                                             |        |
| Other analyses           | 17  | Report other analyses done—eg analyses of subgroups and interactions, and sensitivity analyses                                                                                                               | 15, 16 |
| <b>Discussion</b>        |     |                                                                                                                                                                                                              |        |
| Key results              | 18  | Summarise key results with reference to study objectives                                                                                                                                                     | 16-19  |
| Limitations              | 19  | Discuss limitations of the study, taking into account sources of potential bias or imprecision. Discuss both direction and magnitude of any potential bias                                                   | 19     |
| Interpretation           | 20  | Give a cautious overall interpretation of results considering objectives, limitations, multiplicity of analyses, results from similar studies, and other relevant evidence                                   | 20     |
| Generalisability         | 21  | Discuss the generalisability (external validity) of the study results                                                                                                                                        | 20     |
| <b>Other information</b> |     |                                                                                                                                                                                                              |        |
| Funding                  | 22  | Give the source of funding and the role of the funders for the present study and, if applicable, for the original study on which the present article is based                                                | 20     |

\*Give information separately for cases and controls in case-control studies and, if applicable, for exposed and unexposed groups in cohort and cross-sectional studies.

**Note:** An Explanation and Elaboration article discusses each checklist item and gives methodological background and published examples of transparent reporting. The STROBE checklist is best used in conjunction with this article (freely available on the Web sites of PLoS Medicine at <http://www.plosmedicine.org/>, Annals of Internal Medicine at <http://www.annals.org/>, and Epidemiology at <http://www.epidem.com/>). Information on the STROBE Initiative is available at [www.strobe-statement.org](http://www.strobe-statement.org).

# BMJ Open

## Perceptions of Chronically Ill and Healthy Consumers about Electronic Personal Health Records: A Comparative Empirical Investigation

|                                 |                                                                                                                                   |
|---------------------------------|-----------------------------------------------------------------------------------------------------------------------------------|
| Journal:                        | <i>BMJ Open</i>                                                                                                                   |
| Manuscript ID:                  | bmjopen-2014-005304.R2                                                                                                            |
| Article Type:                   | Research                                                                                                                          |
| Date Submitted by the Author:   | 29-Jun-2014                                                                                                                       |
| Complete List of Authors:       | Cocosila, Mihail; Athabasca University, Faculty of Business<br>Archer, Norm; McMaster University, DeGroote School of Business     |
| <b>Primary Subject Heading</b>: | Health informatics                                                                                                                |
| Secondary Subject Heading:      | Public health                                                                                                                     |
| Keywords:                       | Information technology < BIOTECHNOLOGY & BIOINFORMATICS, Health informatics < BIOTECHNOLOGY & BIOINFORMATICS, PREVENTIVE MEDICINE |
|                                 |                                                                                                                                   |

SCHOLARONE™  
Manuscripts

**Research Article****Title:**

Perceptions of Chronically Ill and Healthy Consumers about Electronic Personal Health Records:  
A Comparative Empirical Investigation

**Corresponding Author:**

Mihail Cocosila, PhD

Faculty of Business  
Athabasca University  
1 University Drive  
Athabasca, AB T9S 3A3  
Canada  
Phone: 1-780-675-6100  
Fax: 1-780-675-6437  
Email: mihailc@athabascau.ca

**Authors:**

Mihail Cocosila<sup>1</sup>, PhD; Norm Archer<sup>2</sup>, PhD

<sup>1</sup>Faculty of Business, Athabasca University, Athabasca, Alberta, Canada

<sup>2</sup>DeGroot School of Business, McMaster University, Hamilton, Ontario, Canada

**Keywords:**

Personal Health Record, information technology, adoption, self-management, Canada

**Word count:**

4103 words (excluding tables)

1  
2  
3  
4  
5  
6  
7  
8  
9  
10  
11  
12  
13  
14  
15  
16  
17  
18  
19  
20  
21  
22  
23  
24  
25  
26  
27  
28  
29  
30  
31  
32  
33  
34  
35  
36  
37  
38  
39  
40  
41  
42  
43  
44  
45  
46  
47  
48  
49  
50  
51  
52  
53  
54  
55  
56  
57  
58  
59  
60

## Perceptions of Chronically Ill and Healthy Consumers about Electronic Personal Health Records: A Comparative Empirical Investigation

### ABSTRACT

**Objective** To develop a model of consumer perceptions of electronic personal health records (PHRs) and validate it in a comparative study between consumers who report having a chronic illness and those who report being well.

**Materials and methods** A model of PHR use motivators and barriers was built and tested through a national survey across Canada. Data were collected from 800 individuals 18 years or older. Half reported having a chronic illness or disability and half reported being well. Analyses were done with Structural Equation Modeling techniques.

**Results** A total of 389 answers from chronically ill and 383 from well participants were collected. Perceived Usefulness was the key explanation of the intention to use PHRs for both ill and well people (total effect of .601 and .565, respectively) followed by Security, Privacy, and Trust in PHRs (total effect of .377 and .479, respectively). Conversely, Computer Anxiety was perceived as a significant barrier (total effect of -.327 for ill individuals and -.212 for well individuals).

**Discussion** The model proposed was appropriate in explaining key consumer positive and negative perceptions on electronic PHR use. We found little difference in perceptions of



1  
2  
3 electronic PHRs between chronically ill and well individuals, although self-reporting their health  
4  
5 status might have influenced the results.  
6  
7

8  
9 **Conclusions** To increase the adoption rate of electronic PHRs among both chronically ill and  
10  
11 well consumers it is necessary to reinforce consumer perceptions of the usefulness of and trust in  
12  
13 these eHealth technologies while mitigating their anxieties about computer use in general.  
14  
15

### 16 17 18 19 **Strengths and limitations of this study**

- 20  
21  
22 • This study developed an unbiased theoretical model of consumer perceptions of  
23  
24 electronic personal health records (PHRs).  
25  
26
- 27  
28 • The model was validated through empirical research comparing the perceptions of  
29  
30 chronically ill and well consumers about electronic PHRs.  
31  
32
- 33  
34 • The health condition of study participants was self-reported and not diagnosed by  
35  
36 practitioners.  
37  
38  
39  
40  
41  
42  
43  
44  
45  
46  
47  
48  
49  
50  
51  
52  
53  
54  
55  
56  
57  
58  
59  
60

## OBJECTIVE

Given the current shortage of medical resources available for managing the growing numbers of patients with chronic illnesses, it is becoming apparent that patient self-management is key to managing such illnesses and improving health and quality of life.[1, 2] To manage this process effectively it is important for patients to maintain up-to-date and readily accessible health records.[1, 3] An online health self-management system that is grounded in the chronic care model[4] and that utilizes the patient's health record as a repository can support a system with self-management functionalities for assisting in improved patient-centered care.[5-8]

Health records maintained and accessible by individual consumers are referred to as Personal Health Records (PHRs). Although they can be recorded and maintained in paper form, a fast emerging trend with the advent of digital data and the Internet is to keep them in an electronic format. Therefore, we will assume throughout this paper that PHRs refer to electronic records on digital media. A PHR can be defined as "An electronic application through which individuals can access, manage and share their health information, and that of others for whom they are authorized, in a private, secure, and confidential environment".[9] This is in contrast with EHR/EMRs (Electronic Health Records/Electronic Medical Records) which contain patient data gathered during the course of patient visits to healthcare providers, and are managed solely by healthcare providers or healthcare institutions. Also, most EHR/EMR data are based on acute care episodes[10] since people are more likely to see their doctors when they have an acute problem.

An ideal form of a PHR is one that exchanges data freely, as authorized by the patient and physician, between the physician's EHR/EMR and the patient's records, as needed.[11]

1  
2  
3 In theory, PHRs can be of great use to patients in the self-management of chronic diseases and  
4 disabilities, but there are significant obstacles to their sustainability, which refers to their  
5 adoption and continued use. Trials of eHealth implementations tend to be prone to participant  
6 dropouts (attrition).[12] Reported attrition rates from the use of PHRs for health self-  
7 management vary widely, from as low as 3% for an interactive web-based intervention that  
8 included telephone counseling, to 65% in a smoking cessation program, and to an enormous rate  
9 of 99% in a panic disorder self-help program.[13, 14] Although factors affecting attrition tend to  
10 be complex,[15] they must be addressed effectively if the benefits of self-management  
11 interventions are to be maximized.  
12  
13  
14  
15  
16  
17  
18  
19  
20  
21  
22  
23

24  
25 The goal of better health may not be sufficient to motivate people to use PHRs, although there  
26 are techniques to predict in advance whether patients will adopt and continue with beneficial  
27 healthcare behaviors.[16] If patient motivation to adopt PHR innovations were better understood,  
28 resulting reductions in attrition rates would lead to improved outcomes from health self-  
29 management interventions.  
30  
31  
32  
33  
34  
35  
36  
37

38 Accordingly, the objective of this study is to determine the key motivators and barriers for  
39 individuals to adopt PHRs. As there are indications that people with serious chronic ailments and  
40 disabilities are more likely to be favorable to the adoption of PHRs than people who are well,[9]  
41 we compared these two groups of people empirically to determine possible differences between  
42 adoption factors. Finally, we discuss the results and their significance to further sustainable  
43 development and implementation of PHRs, and consumer motivation to adopt and use them.  
44  
45  
46  
47  
48  
49  
50  
51  
52  
53  
54  
55  
56  
57  
58  
59  
60

## BACKGROUND AND SIGNIFICANCE

### Personal Health Records background

Studies done in various parts of the world have indicated a great deal of public interest in PHRs. For instance, a major motivation for over 70% of U.S. consumers is that they believe having access to PHRs would improve the quality of their healthcare,[17] although as yet there is no convincing evidence that this is the case. Field studies report the greatest interest in PHRs is manifested by the chronically ill, frequent users of healthcare, and caregivers for elderly parents.[9,18] The same studies show that among American consumers saying they were not interested in using PHRs more than 55% indicated that worries about privacy and confidentiality affected their reluctance. Moreover, about 90% of consumers surveyed felt that the provision of privacy, record access, and user remedies would be significant factors affecting their agreement to use an online PHR service.[17] Conversely, some barriers to maintaining and accessing PHRs include cost and loss of interest over time.[19]

Through online and decision support for patient-centered care, changes in healthcare practice can often help to meet practice and patient goals. For example, research has demonstrated improvements in diabetes outcomes and chronic illness self-management when behavioral support is forthcoming from relevant technologies, improving dietary practices, physical activity, and adherence to medication regimens.[20] Other studies indicate that social activities are particularly important for older people, with health benefits that may include less chance of mortality, disability, and depression, and better cognitive and health-related behaviors.[21] Empirical studies have shown that relative advantage, ease of use, trialability, perceptions of privacy and security, age, and computer experience were positive predictors of the value of

1  
2  
3 PHRs for supporting communications with the doctor's office.[22] Therefore it is important to  
4  
5 understand the key motivators and deterrents for PHR adoption, with the target of improving the  
6  
7 adoption rate and sustainability of these systems.  
8  
9

### 10 11 12 13 14 **Theoretical model and hypotheses** 15

16  
17  
18 In the following, we develop a theoretical model that takes into account the above considerations  
19  
20 and test it for chronically ill and disabled consumers on the one hand and with consumers who  
21  
22 feel that they are relatively healthy on the other hand, in order to compare their perceptions of  
23  
24 PHRs. For this purpose we use a number of key constructs validated by previous research in  
25  
26 information systems and healthcare, and propose hypotheses regarding their relationships, based  
27  
28 on empirical findings and theoretical reasoning.  
29  
30

31  
32  
33 *Information Seeking.* Although patients may prefer not to make all their own decisions about  
34  
35 their healthcare, they do want to be kept informed. Reportedly, over 40 percent of patients with  
36  
37 chronic conditions prefer to receive more information from their healthcare providers than they  
38  
39 actually receive.[23] It seems, therefore, that patients with higher information seeking  
40  
41 preferences are more likely to feel that PHRs are useful in accessing information on their health  
42  
43 status than those who do not. Therefore, we propose the following hypothesis:  
44  
45

46  
47  
48 *H1: Consumers with higher information-seeking preferences will tend to believe that PHRs*  
49  
50 *would be more useful.*  
51

52  
53  
54 *Personal Information Technology Innovativeness.* This construct captures the willingness of an  
55  
56 individual to try out an information technology, as it relates to the concept of technology  
57  
58

1  
2  
3 acceptance.[24] This indicates that people exhibiting high levels of information technology  
4  
5 innovativeness will be more interested in accepting PHRs than those who do not. This leads to  
6  
7 the hypothesis:  
8  
9

10  
11 *H2: Individuals with higher levels of IT innovativeness will exhibit higher levels of perceived*  
12  
13 *usefulness for PHRs.*

14  
15  
16  
17 *Computer Anxiety.* This construct expresses an individual's apprehension or fear when faced  
18  
19 with the possibility of using a computer.[25] Previous research has found a negative relationship  
20  
21 between computer anxiety and perceived usefulness of new technology, as well as to intention to  
22  
23 use a new technology.[26, 27] This results in the following propositions:  
24  
25

26  
27 *H3: Level of computer anxiety will be negatively related to the perceived usefulness of PHRs.*  
28  
29

30  
31 *H4: Level of computer anxiety will be negatively related to the intention to use PHRs.*  
32  
33

34  
35 *Privacy, Security, and Trust.* These concepts have been consistently found in large scale studies  
36  
37 to have an impact on consumer interest in online PHR adoption.[28] While some surveys showed  
38  
39 two-thirds of adult consumers were concerned about security and privacy of their health  
40  
41 data,[17] other market studies found that consumers actually using a PHR did not worry too  
42  
43 much about its privacy implications.[29] The chronically and acutely ill and others who often  
44  
45 require healthcare appear to have fewer concerns about privacy than do health professionals.[30,  
46  
47 31] Consequently, we propose the following hypotheses:  
48  
49

50  
51 *H5: Consumer perceptions of appropriate security and privacy of PHRs, and trust in PHR*  
52  
53 *providers will positively affect their perceptions of PHR usefulness.*  
54  
55

1  
2  
3 *H6: Consumer perceptions of appropriate security and privacy of PHRs, and trust in PHR*  
4 *providers will positively affect their intention to adopt PHRs.*  
5  
6  
7

8  
9 *Perceived Usefulness.* This construct is a widely known and strong extrinsic motivator of  
10 technology use. It expresses “the degree to which a person believes that using a particular system  
11 would enhance his or her job performance”. [32] In the case of PHR use, job performance  
12 (expectancy) would refer to being able to self-monitor accurately certain health parameters.  
13  
14  
15  
16  
17 Thus, it is logical to formulate the hypothesis below:  
18  
19

20  
21 *H7: Higher perceived usefulness for PHRs leads to a higher level of intention to adopt this*  
22 *technology.*  
23  
24  
25

26  
27 The proposed constructs and their related hypotheses are shown in Figure 1 in the form of a  
28 theoretical model of PHR adoption. The final endogenous construct of this model is Behavioral  
29 Intention to adopt PHRs that measures potential user intentions regarding this eHealth support  
30 tool.  
31  
32  
33  
34  
35

36  
37 \*\*\* Insert Figure 1 here. \*\*\*  
38  
39

40  
41 **Figure 1** Theoretical model of PHR adoption  
42  
43  
44  
45

## 46 **MATERIALS AND METHODS**

47

### 48 **Participant recruitment and data collection**

49  
50  
51

52 The theoretical model proposed by this study was tested with empirical data collected through an  
53 online survey of Canadian consumers. Both French and English versions were prepared and pre-  
54  
55  
56  
57

1  
2  
3 tested with graduate students and practitioners in a Canadian university. The full scale survey  
4  
5 was approved by the Research Ethics Board of the university and subsequently conducted with a  
6  
7 Canadian Internet panel of consumers through a market research company. There is no  
8  
9 relationship between the researchers and this company, and the company was not allowed to  
10  
11 analyze nor retain any copies of the data collected during the survey.  
12  
13

14  
15  
16 Participants were required to be at least 18 years old and willing to report their health condition.  
17  
18 Participants were provided detailed descriptions of a chronic illness condition and of its typical  
19  
20 degrees of severity: mild, moderate and severe. 800 of the participants who had pre-registered  
21  
22 with the market research company participated in the experiment: the sample was stratified to  
23  
24 select exactly 400 who reported a chronic illness or disability at various levels of severity, and  
25  
26 exactly 400 who did not report such a condition. These two strata will be indicated in the  
27  
28 remainder of this study as 'Ill' and 'Well'.  
29  
30  
31

32  
33 All participants were presented a detailed description of an electronic Patient Health Record  
34  
35 system and then asked to answer an online questionnaire. The questions it contained were meant  
36  
37 to measure the multi-item latent variables in the theoretical model described in Figure 1, together  
38  
39 with relevant demographic characteristics of the participants surveyed. Most of the survey  
40  
41 questions were adapted from those validated by previous research in healthcare (e.g.,  
42  
43 *Information Seeking*)[33] and information systems (e.g., *Personal Information Technology*  
44  
45 *Innovativeness*, *Computer Anxiety*, *Perceived Usefulness* and *Behavioral Intention*).[24, 27, 32]  
46  
47  
48 Measures for the only formative construct in the model, *Security, Privacy and Trust*, although  
49  
50 initially sourced from separate constructs in relevant information systems literature, were  
51  
52 designed and validated as describing a single variable for this research. Measurement scales are  
53  
54  
55  
56  
57  
58  
59  
60



1  
2  
3 included in Appendix A. All responses were collected on 7-point Likert scales ranging from  
4  
5 Strongly Disagree (1) to Strongly Agree (7), with an additional Not Applicable option. Cases  
6  
7 with more than 10% missing answers were deemed invalid and removed from the data analysis.  
8  
9

### 10 11 12 13 14 **Theoretical model evaluation**

15  
16  
17 As this research was intended mainly for exploratory purposes, data analysis was done with  
18  
19 Partial Least Squares (PLS) due to the suitability of this Structural Equation Modeling  
20  
21 methodology for complex exploratory models,[34] using formative indicators[35] such as the  
22  
23 Security, Privacy and Trust construct used in this research. PLS analysis was carried out with the  
24  
25 SmartPLS software tool[36] and included two successive model assessments: measurement tests  
26  
27 (assessing the reliability and validity of the construct measures), followed by structural tests  
28  
29 (evaluating the relationships between model constructs).[37] Each analysis for the two sub-  
30  
31 samples (Ill and Well) was done separately using the same model.  
32  
33  
34  
35

36  
37 Use of the PLS tool for analysis determined the minimum study sample size. As the study  
38  
39 involves a complex formative construct (i.e., Security, Privacy and Trust), the sample size should  
40  
41 be at least ten times the number of its indicators.[38] Furthermore, sample size should account  
42  
43 for possible high non-response rates or invalid cases in health-related studies. These  
44  
45 considerations led to the target of 400 respondents in each of the two sub-samples.  
46  
47  
48  
49

### 50 51 52 53 **Assessment of differences between ill and well individuals**

1  
2  
3 Results of theoretical model tests for the two sub-samples were compared through differences in  
4 terms of the values of the path coefficients determined by PLS analysis.[38] The degree of  
5 difference was assessed with the *t*-statistic with  $N1+N2-2$  degrees of freedom,[39-41] where:  
6  
7  
8  
9

$$10 \quad t = (Path1 - Path2)/[Spooled*\sqrt{(1/N1+1/N2)}]$$

11  
12 Here, *Path1*, *Path2* are the corresponding path coefficients in the model results and *N1*, *N2* are  
13 the respective sub-sample sizes.  
14  
15  
16

17  
18 *Spooled* represents the pooled estimator for the variance and is calculated from:  
19  
20

$$21 \quad Spooled = \sqrt{\{[square\ of\ (N1-1)/(N1+ N2-2)] *square\ of\ SE1 + [square\ of\ (N2-1)/(N1+ N2-2)] *square\ of\ SE2\}}$$

22  
23 Here *SE1*, *SE2* are the standard errors of the corresponding path coefficients in the two sub-  
24 sample model results.  
25  
26  
27  
28

## 29 30 31 32 33 34 35 36 37 **RESULTS**

### 38 39 40 **Characteristics of study participants**

41  
42 After removing the invalid cases, a total of 389 Ill cases and 383 Well cases remained and were  
43 used in further statistical analyses. Raw data analyzed in this study were part of a larger project  
44 conducted in this setting. Table 1 shows comparative demographic characteristics, summarized  
45 for the two strata.  
46  
47  
48  
49  
50  
51  
52  
53  
54  
55  
56  
57  
58  
59  
60

**Table 1** Participant characteristics

|                                                                                                                            |                 | <b>Ill Participants</b> | <b>Well Participants</b> |
|----------------------------------------------------------------------------------------------------------------------------|-----------------|-------------------------|--------------------------|
| <b>Sample size</b>                                                                                                         |                 | 389                     | 383                      |
| <b>Age (years, average)</b>                                                                                                |                 | 52.5                    | 46.5                     |
| <b>Gender</b>                                                                                                              |                 |                         |                          |
|                                                                                                                            | Female          | 248 (63.7%)             | 221 (57.7%)              |
|                                                                                                                            | Male            | 141 (36.3%)             | 162 (42.3%)              |
| <b>Subject maintains up-to-date PHRs on paper</b>                                                                          |                 |                         |                          |
|                                                                                                                            | Yes             | 132 (34.0%)             | 74 (19.2%)               |
|                                                                                                                            | No              | 257 (66.0%)             | 309 (80.8%)              |
| <b>Subject maintains up-to-date electronic PHRs</b>                                                                        |                 |                         |                          |
|                                                                                                                            | Yes             | 46 (11.7%)              | 22 (5.8%)                |
|                                                                                                                            | No              | 343 (88.3%)             | 361 (94.2%)              |
| <b>Number of visits with a doctor during past 6 months (average)</b>                                                       |                 | 5.0                     | 2.3                      |
| <b>Number of doctors seen during past 6 months (average)</b>                                                               |                 | 2.3                     | 1.4                      |
| <b>Number of children 12 years old or younger for whom they have main care responsibility at home (average)</b>            |                 | 0.2                     | 0.3                      |
| <b>Subject (or someone for whom they are responsible) has a chronic disease that requires continuing medical attention</b> |                 |                         |                          |
|                                                                                                                            | Yes             | 308 (79.2%)             | 81 (21.2%)               |
|                                                                                                                            | No              | 81 (20.8%)              | 302 (78.8%)              |
| <b>Subject (or someone for whom they are responsible) has a disability that requires continuing care</b>                   |                 |                         |                          |
|                                                                                                                            | Yes             | 205 (52.7%)             | 42 (11.0%)               |
|                                                                                                                            | No              | 184 (47.3%)             | 341 (89.0%)              |
| <b>Subject is caring for elderly person(s)</b>                                                                             |                 |                         |                          |
|                                                                                                                            | Yes             | 49 (12.6%)              | 21 (5.5%)                |
|                                                                                                                            | No              | 340 (87.4%)             | 362 (94.5%)              |
| <b>Subject is interested in regularly maintaining records about health</b>                                                 |                 |                         |                          |
|                                                                                                                            | Yes             | 323 (83.0%)             | 247 (64.4%)              |
|                                                                                                                            | No              | 66 (17.0%)              | 136 (35.6%)              |
| <b>Average amount of time spent using the Internet at home daily (largest two categories out of five)</b>                  |                 |                         |                          |
|                                                                                                                            | 31 - 60 minutes | 263 (67.7%)             | 222 (58.0%)              |
|                                                                                                                            | 11 - 30 minutes | 99 (25.5%)              | 111 (29.0%)              |

## Theoretical model evaluation

An initial evaluation of the *measurement model* that comprised 22 items indicated the necessity of dropping 2 items when running it with the Ill data sample and 3 items when running it with the Well data sample, because of unsatisfactory significance and loading values of these items. After re-running SmartPLS for the remaining items, all reflective constructs for both samples displayed Cronbach's alpha and composite reliability values above 0.7, Average Variance Extracted (AVE) values above 0.5, and item loadings above 0.7, while the remaining items of the formative construct Security, Privacy and Trust in PHR were significant and had loadings above 0.5. Thus, the measurement model was considered to have acceptable reliability and convergent validity for both sub-samples.[38 ,42, 43]

A visual inspection of a matrix having the square root of AVEs on the diagonal and the correlations between all reflective constructs in the off diagonal cells showed diagonal numbers to be larger than all numbers on the corresponding rows and columns for both sub-samples (Table 2). This led to the conclusion that the model's reflective constructs had sufficient discriminant validity for both sub-samples.[37] Consequently, the measurement tests of the model for both sub-samples indicated adequate reliability and construct validity for all measurement instruments, either adapted from previous research or developed by this study. This allowed the second step of the PLS process, which was to perform the structural analysis of the model.

**Table 2** Reflective construct correlations and square root of AVEs (Ill sample numbers off parentheses and Well sample numbers in parentheses)

|                                   | <b>Computer Anxiety</b> | <b>Behavioral Intention</b> | <b>Information Seeking</b> | <b>Perceived Usefulness</b> | <b>Personal IT Innovativeness</b> |
|-----------------------------------|-------------------------|-----------------------------|----------------------------|-----------------------------|-----------------------------------|
| <b>Computer Anxiety</b>           | <b>0.89 (0.91)</b>      |                             |                            |                             |                                   |
| <b>Behavioral Intention</b>       | -0.51 (-0.38)           | <b>0.87 (0.93)</b>          |                            |                             |                                   |
| <b>Information Seeking</b>        | -0.13 (-0.13)           | 0.27 (0.24)                 | <b>0.86 (0.88)</b>         |                             |                                   |
| <b>Perceived Usefulness</b>       | -0.47 (-0.31)           | 0.76 (0.75)                 | 0.33 (0.34)                | <b>0.92 (0.92)</b>          |                                   |
| <b>Personal IT Innovativeness</b> | -0.33 (-0.17)           | 0.46 (0.38)                 | 0.07 (0.03)                | 0.39 (0.42)                 | <b>0.92 (0.94)</b>                |

Evaluation of the *structural model* involved running SmartPLS with a bootstrap of 200 re-samples. Results for path coefficients, their significance levels, and the values of  $R^2$  are compared in Figure 2 for both sub-samples.

\*\*\* Insert Figure 2 here. \*\*\*

**Figure 2** Path coefficients, significance levels and  $R^2$  values for the PHR adoption model (Ill sub-sample numbers above the line and Well sub-sample numbers below the line)

SmartPLS results also provided the total effects of the factors in the theoretical model on behavioral intention to use PHRs, for the two categories of participants (Table 3).

**Table 3** Total effects and their significance levels on behavioral intention to adopt PHRs

| <b>Antecedent Construct</b> | <b>Ill Sample</b>  |                | <b>Well Sample</b> |                |
|-----------------------------|--------------------|----------------|--------------------|----------------|
|                             | <b>Coefficient</b> | <b>P-value</b> | <b>Coefficient</b> | <b>P-value</b> |

|                              |       |       |       |       |
|------------------------------|-------|-------|-------|-------|
| Computer Anxiety             | -.327 | <.001 | -.212 | .01   |
| Information Seeking          | .118  | .01   | .141  | .01   |
| Perceived Usefulness         | .601  | <.001 | .565  | <.001 |
| Personal IT Innovativeness   | .100  | .08   | .162  | .01   |
| Security, Privacy, and Trust | .377  | <.001 | .479  | <.001 |

All characteristics in Table 1 were tested as potential control variables. In the case of the PHR Ill sub-sample the only influence came from the factor '*subject is interested in regularly maintaining records about health*'. This factor influenced positively the Perceived Usefulness construct (path coefficient of .234 at a  $P = .02$  significance level) and increased the variance explained by this construct from  $R^2 = 0.473$  to  $R^2 = 0.521$ ). In the case of the PHR Well sub-sample the same interest in regularly maintaining records about health influenced positively the Perceived Usefulness construct (path coefficient of .171 at a  $P = .04$  significance level and increased the variance explained from  $R^2 = 0.474$  to  $R^2 = 0.499$ ). In addition for this sub-sample, the factor increased Behavioral Intention (path coefficient of .154 at a  $P = .03$  significance level and increase of variance explained from  $R^2 = 0.620$  to  $R^2 = 0.640$ ). So, the results for the control variable '*subject is interested in regularly maintaining records about health*' played a significant role in both sub-samples.

The self-reported degree of severity of the chronic illness or condition (i.e., mild, moderate or severe) was tested as a possible control variable for the Ill sub-sample. No statistically significant effects on the theoretical model were noticed.

### Assessment of differences between ill and well individuals

The results of the differences between the path coefficients of the model for the two sub-samples are presented jointly in Table 4. No  $P$ -values were calculated since the lack of statistical significance, at a level of probability  $P < .05$ , of the difference between the results from the two sub-samples (indicated by the low absolute  $t$ -value of the difference) is very clear.

**Table 4** Statistical analysis of differences between Ill and Well consumer sub-samples

| Path                                                | Ill Sub-sample Path Coefficient | Well Sub-sample Path Coefficient | Absolute $t$ -value of Difference |
|-----------------------------------------------------|---------------------------------|----------------------------------|-----------------------------------|
| Computer Anxiety → Behavioral Intention             | -.177                           | -.142                            | 0.348                             |
| Computer Anxiety → Perceived Usefulness             | -.249                           | -.123                            | 1.021                             |
| Information Seeking → Perceived Usefulness          | .196                            | .249                             | 0.479                             |
| Perceived Usefulness → Behavioral Intention         | .601                            | .565                             | 0.255                             |
| Personal IT Innovativeness → Perceived Usefulness   | .167                            | .287                             | 0.982                             |
| Security, Privacy, and Trust → Behavioral Intention | .140                            | .244                             | 0.717                             |
| Security, Privacy, and Trust → Perceived Usefulness | .393                            | .416                             | 0.161                             |

## DISCUSSION

### Principal findings and comparison with prior work

The objective of this study was to determine the key motivators for individuals to adopt electronic Personal Health Records, through a theoretical behavioral model developed here. Furthermore, as previous research and theoretical reasoning indicated that people with chronic illnesses may be more likely to be favorable to the adoption of PHRs than people who are well,[9] in our study we use the model we developed to compare two sub-samples drawn in

1  
2  
3 Canada from these two populations in order to assess empirically the possible behavioral  
4  
5 differences and their determinants.  
6  
7

8  
9 Our study (Table 3 and Figure 2) confirms largely the findings of research in information  
10  
11 systems according to which Perceived Usefulness is the key explanation of the behavioral  
12  
13 intention to use an information technology application.[44] Therefore individuals, either  
14  
15 chronically ill or well, would use PHRs only if they see the usefulness of these artifacts. This is  
16  
17 concordant with findings on other empirical studies on PHRs that showed relative advantage[22]  
18  
19 or perception of empowerment[45] as key motivators of adoption.  
20  
21  
22

23  
24 As expected from previous research,[17] the perception of Security, Privacy, and Trust in PHRs  
25  
26 is a significant motivator for use in both categories of individuals surveyed. Table 3 shows this  
27  
28 factor is second in terms of total effect to Perceived Usefulness only, being significant at  $P <$   
29  
30  $.001$  for both sub-samples. Interestingly, Security, Privacy, and Trust in PHRs has a non-  
31  
32 significant direct influence on Behavioral Intention to use PHRs for the Ill sub-sample  
33  
34 (coefficient =  $.140$ ,  $P = .15$ ). This means security, privacy and trust mean less for ill people – the  
35  
36 association of these features with usefulness is more important in the adoption equation. This is  
37  
38 confirmed by previous research showing that benefits of access to medical records online may  
39  
40 outweigh privacy risk perceptions.[46]  
41  
42  
43  
44

45  
46 Study results confirm that Information Seeking and Personal IT Innovativeness are motivators of  
47  
48 PHR use for both categories of potential users while exerting their influence through Perceived  
49  
50 Usefulness (Table 3 and Figure 2). However, the total effect of Personal IT Innovativeness over  
51  
52 adoption intention is not significant for the Ill sub-sample, but it is for the Well sub-sample  
53  
54 (Table 3).  
55  
56  
57  
58  
59  
60



1  
2  
3 As hypothesized, Computer Anxiety is the only deterrent on PHR adoption in the theoretical  
4 model proposed by this study. It has a negative total influence significant at  $P < .001$  for the Ill  
5 sub-sample and at  $P = .01$  for the Well sub-sample (Table 3).  
6  
7  
8  
9

10  
11 All demographic characteristics measured and reported in Table 1 were tested as control  
12 variables but had no effect for either sample with the exception of participant interest in regularly  
13 maintaining records about health. This factor was positive for both sub-samples but more so for  
14 the Well one. Therefore, individual interest in self-monitoring health makes them better able to  
15 perceive PHR usefulness and to want to use these systems.  
16  
17  
18  
19  
20  
21  
22

23  
24 Overall, the original model proposed by this study to explain the adoption of PHRs had  
25 moderately high variance explained values for all the endogenous constructs, for both sub-  
26 samples ( $R^2$  of 0.473/0.474 for Perceived Usefulness and 0.620/0.626 for Behavioral Intention)  
27 and 6 out of 7 significant paths in both cases (Figure 2). Therefore, from the statistical point of  
28 view, this model could be considered to be reasonably good.[47]  
29  
30  
31  
32  
33  
34  
35  
36  
37  
38  
39

#### 40 **Assessment of differences between ill and well individuals**

41  
42  
43 The key outcomes from the study of perceptions on PHRs of Ill and Well individuals in Table 4  
44 show that there were no statistically significant differences (at a level  $P < .05$ ) between the two  
45 sub-samples for any of the paths in Figure 2. On the surface, these outcomes appear to contradict  
46 what we had expected – that people with chronic illnesses or disabilities are more interested in  
47 PHR adoption than are well people. We suspect that the differences are masked by the fact that  
48 many of the people in the Ill sample were, in fact, not seriously ill. The low rate of current PHR  
49  
50  
51  
52  
53  
54  
55  
56  
57  
58  
59  
60

1  
2  
3 use in the both sub-samples could be another explanation for the non-significant differences in  
4  
5 perceptions between them. Findings from consumers, especially those with serious chronic  
6  
7 illnesses, who had a considerable amount of experience with well-designed PHRs, might be  
8  
9 more conclusive than the results from this comparative survey.  
10  
11  
12  
13

## 14 15 16 17 **Limitations**

18  
19  
20 As in virtually any empirical research, this study has some limitations. First, it is likely that the  
21  
22 functionalities that accompany PHR systems would have a strong influence on their adoption.  
23  
24 This aspect was not measured in this study. Second, the participants were all Internet users, so it  
25  
26 excluded many, particularly older, consumers who were not. In fact more than 60% of the survey  
27  
28 participants overall claimed to use the Internet for from 30 to 60 minutes per day. On the other  
29  
30 hand, the proportion of Internet and portable device users falls off rapidly with age beyond 65  
31  
32 years,[48] especially for lower income seniors. Therefore, “those who can benefit the most from  
33  
34 a PHR system may be the least able to use it”.[49] In addition to all these limitations, the most  
35  
36 important for a comparative study such as this, participant health conditions were self-reported  
37  
38 and not diagnosed by practitioners. Therefore, it is possible that the difference we found in  
39  
40 overall perceptions between the two sub-samples was not significant because the difference in  
41  
42 participant self-reported health condition between the two sub-samples was weak.  
43  
44  
45  
46  
47  
48  
49  
50  
51

## 52 **CONCLUSIONS**

1  
2  
3 Despite the inherent limitations of an exploratory study, this research has the merit of  
4  
5 investigating individual perceptions about electronic PHRs, using a rigorous theoretical approach  
6  
7 that considers the perspectives of ill and well people separately. While remaining parsimonious,  
8  
9 the theoretical model developed by this research has the merit of explaining a reasonably high  
10  
11 percent of the consumer intention to use electronic PHRs and thus could be a starting point for  
12  
13 researchers examining more complex models of eHealth adoption.  
14  
15  
16

17  
18 According to the findings of this research, to maximize the chances of adoption for PHR support  
19  
20 in self-management initiatives, it appears necessary to enhance the motivators, especially the  
21  
22 perceptions of usefulness as well as that of security, privacy and trust in PHRs, while mitigating  
23  
24 anxieties associated with computer use. Developers and implementers of electronic PHRs should  
25  
26 try to enhance the perceptions of positive factors among consumers, and focus on the benefits of  
27  
28 using these systems in particular, since favourable factors are far more important than deterrents  
29  
30 in the overall adoption equation.  
31  
32  
33

34  
35 A first exposure to PHRs did not reveal significantly different perceptions of this tool between  
36  
37 individuals who reported having a chronic illness and those who reported being well. Therefore  
38  
39 it appears that both categories of potential users should be addressed by promoters of PHRs in  
40  
41 much the same way in terms of motivating and demotivating factors. However, caution is  
42  
43 advised regarding assumptions of equivalence between individuals who report being chronically  
44  
45 ill and those who have been diagnosed accordingly. Thus, future studies should attempt to survey  
46  
47 chronically ill patients recruited through the healthcare system, after having a specified  
48  
49 experience with self-managing their conditions with the aid of PHRs. A comparison of their  
50  
51  
52  
53  
54  
55  
56  
57  
58  
59  
60

1  
2  
3 perceptions of PHRs with those of well individuals would help to improve our understanding of  
4  
5  
6 how the adoption of PHRs could be increased overall.  
7  
8  
9  
10  
11  
12  
13  
14  
15  
16  
17  
18  
19  
20  
21  
22  
23  
24  
25  
26  
27  
28  
29  
30  
31  
32  
33  
34  
35  
36  
37  
38  
39  
40  
41  
42  
43  
44  
45  
46  
47  
48  
49  
50  
51  
52  
53  
54  
55  
56  
57  
58  
59  
60

For peer review only

## Contributorship Statement

Both authors

1) made substantial contributions to conception and design, acquisition of data, or analysis and interpretation of data;

2) contributed to drafting the article or revising it critically for important intellectual content; and

3) gave final approval of the version to be published.

**Funding** This research was funded by a grant from the Canadian Institutes for Health Research.

This organization was not involved directly in the design or implementation of this study. This article is solely the responsibility of the authors and does not necessarily represent the official views of the Canadian Institutes of Health Research.

**Competing interests** None.

**Ethics approval** Research Ethics Board of a Canadian university.

**Data sharing statement** No additional data available.

## REFERENCES

1. Holman H, Lorig K. Patient self-management: a key to effectiveness and efficiency in care of chronic disease. *Public Health Reports* 2004;**119**:239-43.
2. Warsi A, Wang PS, LaValley MP, et al. Self-management education programs in chronic disease. *Arch Intern Med* 2004;**164**(15):1641-9. PMID: 15302634.
3. Weitzman ER, Kaci L, Mandl KD. Acceptability of a personally controlled health record in a community-based setting: implications for policy and design. *J Med Internet Res* 2009;**11**(2):e14. URL: <http://www.jmir.org/2009/2/e14/> doi: 10.2196/jmir.1187 PMID: 19403467.
4. Bodenheimer T, Wagner EH, Grumbach K. Improving chronic care for patients with chronic illness: the chronic care model, Part 2. *J Am Med Assoc* 2002;**16**(288):1909-14. PMID: 12377092.
5. Alphin S, Kjoller M, Davidsen M, et al. Self-reported ischemic heart disease: prevalence, sociodemographics, health behavior, health-care utilization, and quality of life. *Open J Prev Med* 2012;**2**(2):240-8.
6. Hess R, Bryce CL, Paone S, et al. Exploring challenges and potentials of personal health records in diabetes self-management: implementation and initial assessment. *Telemed J E Health* 2007;**13**(5):509-18.
7. Siminerio LM. The role of technology and the chronic care model. *J Diabetes Sci Technol* 2010;**4**(2):470-5.
8. Wiljer D, Urowitz S, Apatu E, et al. Patient accessible electronic health records: exploring recommendations for successful implementation strategies. *J Med Internet Res* 2008;**10**(4):e34. URL: <http://www.jmir.org/2008/4/e34/> doi: 10.2196/jmir.1061 PMID: 18974036.
9. Markle Foundation. The personal health working group final report 2003. URL:<http://research.policyarchive.org/15473.pdf>. Accessed: 2013-10-27. (Archived by WebCite® at <http://www.webcitation.org/6KhE3vwDS>).
10. Tang PC, Ash JS, Bates DW, et al. Personal health records: Definitions, benefits, and strategies for overcoming barriers to adoption. *J Am Med Inform Assoc* 2006 Mar-Apr;**13**(2):121-6. doi: 10.1197/jamia.M2025 PMID: 16357345.
11. Halamka JD, Mandl KD, Tang PC. Early experiences with personal health records. *J Am Med Inform Assoc* 2008 Jan-Feb;**15**(1):1-7. PMID: 17947615.
12. Eysenbach G. The law of attrition. *J Med Internet Res* 2005;**7**(1):e11. URL: <http://www.jmir.org/2005/1/e11/> doi: 10.2196/jmir.7.1.e11 PMID: 15829473.
13. Farvolden P, Denisoff E, Selby P, et al. Usage and longitudinal effectiveness of a web-based self-help cognitive behavioral therapy program for panic disorder. *J Med Internet Res* 2005;**7**(1):e7. URL: <http://www.jmir.org/2005/1/e7/> doi: 10.2196/jmir.7.1.e7 PMID: 15829479.
14. Etter JF. Comparing the efficacy of two Internet-based, computer-tailored smoking cessation programs: a randomized trial. *J Med Internet Res* 2005;**7**(1):e2. URL: <http://www.jmir.org/2005/1/e2/> doi: 10.2196/jmir.7.1.e2 PMID: 15829474.
15. Fielding D, Duff A. Compliance with treatment protocols: interventions for children with chronic illness. *Arch Dis Child* 1999 Feb;**80**(2):196-200. PMID: 10325743.

16. Shankar A, Conner M, Bodansky HJ. Can the theory of planned behaviour predict maintenance of a frequently repeated behaviour? *Psychol Health Med*. 2007 Mar;**12**(2):213-224. PMID: 17365901.
17. Markle Foundation. Americans overwhelmingly believe electronic personal health records could improve their health 2008. URL: <http://www.markle.org/sites/default/files/ResearchBrief-200806.pdf>. Accessed: 2013-10-27. (Archived by WebCite® at <http://www.webcitation.org/67gKru0S3>).
18. Lafky DB, Horan TA. Prospective personal health record use among different user groups: results of a multi-wave study. Hawaii International Conference on System Sciences, Proceedings of the 41st Annual, Hawaii, U.S.A, 7-10 Jan. 2008. doi: 10.1109/HICSS.2008.363.
19. King DK, Toobert DJ, Portz JD, et al. What patients want: relevant health information technology for diabetes self-management. *Health and Technology* 2012;**2**:147-157. doi: 10.1007/s12553-012-0022-7.
20. Benhamou PY. Improving diabetes management with electronic health records and patients' health records. *Diabetes Metab* 2011 Dec;**37** Suppl 4:S53-S56. doi: 10.1016/S1262-3636(11)70966-1. PMID: 22208711.
21. Gilmour H. Social participation and the health and well-being of Canadian seniors. *Health Rep* 2012 Dec;**23**(4):23-32. PMID: 23356042.
22. Emani S, Yamin CK, Peters E, et al. Patient perceptions of a personal health record: a test of the Diffusion of Innovation model. *J Med Internet Res* 2012;**14**(6):e150. URL: <http://www.jmir.org/2012/6/e150/> doi: 10.2196/jmir.2278 PMID: 23128775.
23. Strull WM, Lo B, Charles G. Do patients want to participate in medical decision making? *J Am Med Assoc*, 1984 Dec 7;**252**(21):2990-4. PMID: 6502860.
24. Agarwal R, Prasad J. A conceptual and operational definition of personal innovativeness in the domain of information technology. *Information Systems Research* 1998;**9**(2):204-15.
25. Simonson MR, Maurer M, Montag-Torardi M, et al. Development of a standardized test of computer literacy and a computer anxiety index. *Journal of Educational Computing Research* 1987;**3**(2):231-247.
26. Igbaria M, Schiffman SJ, Wieckowski TJ. The respective roles of perceived usefulness and perceived fun in the acceptance of microcomputer technology. *Behaviour and Information Technology* 1994;**13**(6):349-61.
27. Venkatesh V, Morris MG, Davis GB, et al. User acceptance of information technology: Toward a unified view. *MIS Quarterly* 2003;**27**(3):425-478.
28. Wen KY, Kreps G, Zhu F, et al. Consumers' perceptions about and use of the Internet for personal health records and health information exchange: analysis of the 2007 Health Information National Trends survey. *J Med Internet Res* 2010;**12**(4):e73. URL: <http://www.jmir.org/2010/4/e73/> doi: 10.2196/jmir.1668 PMID: 21169163.
29. CHCF. Consumers and health information technology: a national survey 2010. URL:<http://www.chcf.org/publications/2010/04/consumers-and-health-information-technology-a-national-survey>. Accessed: 2013-10-27. (Archived by WebCite® at <http://www.webcitation.org/6Ki6wprfO>).

- 1  
2  
3  
4  
5  
6  
7  
8  
9  
10  
11  
12  
13  
14  
15  
16  
17  
18  
19  
20  
21  
22  
23  
24  
25  
26  
27  
28  
29  
30  
31  
32  
33  
34  
35  
36  
37  
38  
39  
40  
41  
42  
43  
44  
45  
46  
47  
48  
49  
50  
51  
52  
53  
54  
55  
56  
57  
58  
59  
60
30. Hassol A, Walker JM, Kidder D, et al. Patient experiences and attitudes about access to a patient electronic health care record and linked Web messaging. *J Am Med Inform Assoc* 2004 Nov-Dec;**11**(6):505-13. PMID: 15299001.
  31. Walker J, Ahern DK, Le LX, et al. Insights for internists: "I want the computer to know who I am". *J Gen Intern Med* 2009 Jun;**24**(6):727-32. doi: 10.1007/s11606-009-0973-1 PMID: 19412641.
  32. Davis F. Perceived usefulness, perceived ease of use, and user acceptance of information technology. *MIS Quarterly* 1989;**13**(3):319-40.
  33. Wilson EV, Lankton NK. Modeling patients' acceptance of provider-delivered e-health. *J Am Med Inform Assoc*. 2004 Jul-Aug;**11**(4):241-8. PMID: 15064290.
  34. Bontis N, Crossan MM, Hulland J. Managing an organizational learning system by aligning stocks and flows. *Journal of Management Studies* 2002;**39**(4):437-69.
  35. Thomas RD, Lu IRR, Cedzynski M. Partial least squares: a critical review and a potential alternative. 2005 Administrative Sciences Association of Canada Conference, Toronto, Ontario, Canada.  
URL:<http://citeseerx.ist.psu.edu/viewdoc/download?doi=10.1.1.86.1719&rep=rep1&type=pdf>. Accessed: 2013-10-28. (Archived by WebCite® at <http://www.webcitation.org/6Ki8UyHTh>).
  36. Ringle CM, Wende S, Will, A. SmartPLS 2.0 (M3) Beta; 2005.  
URL:<http://www.smartpls.de/forum>. Accessed: 2013-10-28. (Archived by WebCite® at <http://www.webcitation.org/5uZLmc5cJ>).
  37. Gefen D, Straub D. A practical guide to factorial validity using PLS-Graph: tutorial and annotated example. *Communications of the Association for Information Systems* 2005;**16**:91-109.
  38. Jarvenpaa SL, Shaw TR, Staples DS. Toward contextualized theories of trust: the role of trust in global virtual teams. *Information Systems Research* 2004 September;**15**(3):250-267.
  39. Ahuja MK, Thatcher, JB. Moving beyond intentions and toward the theory of trying: effects of work environment and gender on post-adoption information technology use. *MIS Quarterly* 2005 Sep; **29**(3):427-59.
  40. Archer N, Cocosila M. A comparison of physician pre-adoption and adoption views on Electronic Health Records in Canadian medical practices. *J Med Internet Res* 2011;**13**(3):e57. URL: <http://www.jmir.org/2011/3/e57/> doi: 10.2196/jmir.1726 PMID: 21840835.
  41. Chin WW. Frequently asked questions - Partial Least Squares & PLS-Graph; 2000. URL: <http://disc-nt.cba.uh.edu/chin/plsfaq/plsfaq.htm>. Accessed: 2013-10-28. (Archived by WebCite® at <http://www.webcitation.org/5uZMSOxrz>).
  42. Bontis N. National intellectual capital index: a United Nations initiative for the Arab region. *Journal of Intellectual Capital* 2004;**5**(1):13-39.
  43. Fornell C, Larcker, DF. Evaluating structural equation models with unobservable variables and measurement error. *Journal of Marketing Research* 1981;**18**(1):39-50.
  44. Venkatesh V, Speier C, Morris MG. User acceptance enablers in individual decision making about technology: toward an integrated model. *Decision Sciences* 2002;**33**(2):297-316.



- 1  
2  
3  
4 45. Agarwal R, Anderson C, Zarate J, et al. If we offer it, will they accept? Factors affecting  
5 patient use intentions of personal health records and secure messaging  
6 J Med Internet Res 2013;**15**(2):e43. URL: <http://www.jmir.org/2013/2/e43/>  
7 doi: 10.2196/jmir.2243 PMID: 23470453.
- 8 46. Vodicka E, Mejilla R, Leveille SG, et al. Online access to doctors' notes: patient concerns  
9 about privacy. J Med Internet Res 2013;**15**(9):e208. URL:  
10 <http://www.jmir.org/2013/9/e208/> doi: 10.2196/jmir.2670 PMID: 24072335.
- 11 47. Bontis N, Keow WCC, Richardson S. Intellectual capital and business performance in  
12 Malaysian industries. Journal of Intellectual Capital 2000;**1**(1):85-100.
- 13 48. Pew Internet. Mobile Health 2012. Pew Internet Research Center 2012.  
14 URL:<http://pewinternet.org/Reports/2012/Mobile-Health.aspx>. Accessed: 2013-10-28.  
15 (Archived by WebCite® at <http://www.webcitation.org/6Ki9MnKwz>).
- 16 49. Kim EH, Stolyar A, Lober WB, et al. Challenges to using an electronic personal health  
17 record by a low-income elderly population. J Med Internet Res 2009;**11**(4):e44. URL:  
18 <http://www.jmir.org/2009/4/e44/> doi: 10.2196/jmir.1256 PMID: 19861298.  
19  
20  
21  
22

## 23 Figure legends

24  
25  
26  
27 **Figure 1** Theoretical model of PHR adoption

28  
29  
30 **Figure 2** Path coefficients, significance levels and  $R^2$  values for the PHR adoption model (III  
31 sub-sample numbers above the line and Well sub-sample numbers below the line)  
32  
33  
34  
35  
36  
37  
38  
39  
40  
41  
42  
43  
44  
45  
46  
47  
48  
49  
50  
51  
52  
53  
54  
55  
56  
57  
58  
59  
60

## Research Article

### **Title:**

Perceptions of Chronically Ill and Healthy Consumers about Electronic Personal Health Records:  
A Comparative Empirical Investigation

### **Corresponding Author:**

Mihail Cocosila, PhD

Faculty of Business  
Athabasca University  
1 University Drive  
Athabasca, AB T9S 3A3  
Canada  
Phone: 1-780-675-6100  
Fax: 1-780-675-6437  
Email: mihailc@athabascau.ca

### **Authors:**

Mihail Cocosila<sup>1</sup>, PhD; Norm Archer<sup>2</sup>, PhD

<sup>1</sup>Faculty of Business, Athabasca University, Athabasca, Alberta, Canada

<sup>2</sup>DeGroot School of Business, McMaster University, Hamilton, Ontario, Canada

### **Keywords:**

Personal Health Record, information technology, adoption, self-management, Canada

### **Word count:**

4208-4103 words (excluding tables)

1  
2  
3  
4  
5 **Perceptions of Chronically Ill and Healthy Consumers about Electronic Personal Health**  
6  
7 **Records: A Comparative Empirical Investigation**  
8  
9

10  
11  
12  
13  
14 **ABSTRACT**  
15

16  
17 **Objective** To develop a model of consumer perceptions of electronic personal health records  
18 (PHRs) and validate it in a comparative study between consumers who report having a chronic  
19 illness and those who report being well.  
20  
21  
22  
23

24  
25 **Materials and methods** A model of PHR use motivators and barriers was built and tested  
26 through a national survey across Canada. Data were collected from 800 individuals 18 years or  
27 older. Half reported having a chronic illness or disability and half reported being well. Analyses  
28 were done with Structural Equation Modeling techniques.  
29  
30  
31  
32  
33

34  
35 **Results** A total of 389 answers from chronically ill and 383 from well participants were  
36 collected. Perceived Usefulness was the key explanation of the intention to use PHRs for both ill  
37 and well people (total effect of .601 and .565, respectively) followed by Security, Privacy, and  
38 Trust in PHRs (total effect of .377 and .479, respectively). Conversely, Computer Anxiety was  
39 perceived as a significant barrier (total effect of -.327 for ill individuals and -.212 for well  
40 individuals).  
41  
42  
43  
44  
45  
46  
47  
48

49  
50 **Discussion** The model proposed was appropriate in explaining key consumer positive and  
51 negative perceptions on electronic PHR use. We found little difference in perceptions of  
52  
53  
54  
55  
56  
57  
58  
59  
60

1  
2  
3 electronic PHRs between chronically ill and well individuals, although self-reporting their health  
4 status might have influenced the results.  
5  
6  
7

8  
9 **Conclusions** To increase the adoption rate of electronic PHRs among both chronically ill and  
10 well consumers it is necessary to reinforce consumer perceptions of the usefulness of and trust in  
11 these eHealth technologies while mitigating their anxieties about computer use in general.  
12  
13  
14

### 15 16 17 18 19 **Strengths and limitations of this study**

- 20  
21  
22 • This study developed an unbiased theoretical model of consumer perceptions of  
23 electronic personal health records (PHRs).  
24  
25  
26
- 27  
28 • The model was validated through empirical research comparing the perceptions of  
29 chronically ill and well consumers about electronic PHRs.  
30  
31  
32
- 33  
34 • The health condition of study participants was self-reported and not diagnosed by  
35 practitioners.  
36  
37  
38  
39  
40  
41  
42  
43  
44  
45  
46  
47  
48  
49  
50  
51  
52  
53  
54  
55  
56  
57  
58  
59  
60

## OBJECTIVE

Given the current shortage of medical resources available for managing the growing numbers of patients with chronic illnesses, it is becoming apparent that patient self-management is key to managing such illnesses and improving health and quality of life.[1, 2] To manage this process effectively it is important for patients to maintain up-to-date and readily accessible health records.[1, 3] An online health self-management system that is grounded in the chronic care model[4] and that utilizes the patient's health record as a repository can support a system with self-management functionalities for assisting in improved patient-centered care.[5-8]

Health records maintained and accessible by individual consumers are referred to as Personal Health Records (PHRs). Although they can be recorded and maintained in paper form, a fast emerging trend with the advent of digital data and the Internet is to keep them in an electronic format. Therefore, we will assume throughout this paper that PHRs refer to electronic records on digital media. A PHR can be defined as "An electronic application through which individuals can access, manage and share their health information, and that of others for whom they are authorized, in a private, secure, and confidential environment".[9] This is in contrast with EHR/EMRs (Electronic Health Records/Electronic Medical Records) which contain patient data gathered during the course of patient visits to healthcare providers, and are managed solely by healthcare providers or healthcare institutions. Also, most EHR/EMR data are based on acute care episodes[10] since people are more likely to see their doctors when they have an acute problem.

An ideal form of a PHR is one that exchanges data freely, as authorized by the patient and physician, between the physician's EHR/EMR and the patient's records, as needed.[11]

1  
2  
3 In theory, PHRs can be of great use to patients in the self-management of chronic diseases and  
4 disabilities, but there are significant obstacles to their sustainability, which refers to their  
5 adoption and continued use. Trials of eHealth implementations tend to be prone to participant  
6 dropouts (attrition).[12] Reported attrition rates from the use of PHRs for health self-  
7 management vary widely, from as low as 3% for an interactive web-based intervention that  
8 included telephone counseling, to 65% in a smoking cessation program, and to an enormous rate  
9 of 99% in a panic disorder self-help program.[13, 14] Although factors affecting attrition tend to  
10 be complex,[15] they must be addressed effectively if the benefits of self-management  
11 interventions are to be maximized.  
12  
13  
14  
15  
16  
17  
18  
19  
20  
21  
22  
23

24  
25 The goal of better health may not be sufficient to motivate people to use PHRs, although there  
26 are techniques to predict in advance whether patients will adopt and continue with beneficial  
27 healthcare behaviors.[16] If patient motivation to adopt PHR innovations were better understood,  
28 resulting reductions in attrition rates would lead to improved outcomes from health self-  
29 management interventions.  
30  
31  
32  
33  
34  
35  
36  
37

38 Accordingly, the objective of this study is to determine the key motivators and barriers for  
39 individuals to adopt PHRs. As there are indications that people with serious chronic ailments and  
40 disabilities are more likely to be favorable to the adoption of PHRs than people who are well,[9]  
41 we compared these two groups of people empirically to determine possible differences between  
42 adoption factors. Finally, we discuss the results and their significance to further sustainable  
43 development and implementation of PHRs, and consumer motivation to adopt and use them.  
44  
45  
46  
47  
48  
49  
50  
51  
52  
53  
54  
55  
56  
57  
58  
59  
60

## BACKGROUND AND SIGNIFICANCE

### Personal Health Records background

Studies done in various parts of the world have indicated a great deal of public interest in PHRs. For instance, a major motivation for over 70% of U.S. consumers is that they believe having access to PHRs would improve the quality of their healthcare,[17] although as yet there is no convincing evidence that this is the case. Field studies report the greatest interest in PHRs is manifested by the chronically ill, frequent users of healthcare, and caregivers for elderly parents.[9,18] The same studies show that among American consumers saying they were not interested in using PHRs more than 55% indicated that worries about privacy and confidentiality affected their reluctance. Moreover, about 90% of consumers surveyed felt that the provision of privacy, record access, and user remedies would be significant factors affecting their agreement to use an online PHR service.[17] Conversely, some barriers to maintaining and accessing PHRs include cost and loss of interest over time.[19]

Through online and decision support for patient-centered care, changes in healthcare practice can often help to meet practice and patient goals. For example, research has demonstrated improvements in diabetes outcomes and chronic illness self-management when behavioral support is forthcoming from relevant technologies, improving dietary practices, physical activity, and adherence to medication regimens.[20] Other studies indicate that social activities are particularly important for older people, with health benefits that may include less chance of mortality, disability, and depression, and better cognitive and health-related behaviors.[21] Empirical studies have shown that relative advantage, ease of use, trialability, perceptions of privacy and security, age, and computer experience were positive predictors of the value of

1  
2  
3 PHRs for supporting communications with the doctor's office.[22] Therefore it is important to  
4  
5 understand the key motivators and deterrents for PHR adoption, with the target of improving the  
6  
7 adoption rate and sustainability of these systems.  
8  
9

### 10 11 12 13 14 **Theoretical model and hypotheses** 15

16  
17  
18 In the following, we develop a theoretical model that takes into account the above considerations  
19  
20 and test it for chronically ill and disabled consumers on the one hand and with consumers who  
21  
22 feel that they are relatively healthy on the other hand, in order to compare their perceptions of  
23  
24 PHRs. For this purpose we use a number of key constructs validated by previous research in  
25  
26 information systems and healthcare, and propose hypotheses regarding their relationships, based  
27  
28 on empirical findings and theoretical reasoning.  
29  
30

31  
32  
33 *Information Seeking.* Although patients may prefer not to make all their own decisions about  
34  
35 their healthcare, they do want to be kept informed. Reportedly, over 40 percent of patients with  
36  
37 chronic conditions prefer to receive more information from their healthcare providers than they  
38  
39 actually receive.[23] It seems, therefore, that patients with higher information seeking  
40  
41 preferences are more likely to feel that PHRs are useful in accessing information on their health  
42  
43 status than those who do not. Therefore, we propose the following hypothesis:  
44  
45

46  
47  
48 *H1: Consumers with higher information-seeking preferences will tend to believe that PHRs*  
49  
50 *would be more useful.*  
51

52  
53  
54 *Personal Information Technology Innovativeness.* This construct captures the willingness of an  
55  
56 individual to try out an information technology, as it relates to the concept of technology  
57



1  
2  
3 acceptance.[24] This indicates that people exhibiting high levels of information technology  
4  
5 innovativeness will be more interested in accepting PHRs than those who do not. This leads to  
6  
7 the hypothesis:  
8  
9

10  
11 *H2: Individuals with higher levels of IT innovativeness will exhibit higher levels of perceived*  
12  
13 *usefulness for PHRs.*  
14

15  
16 *Computer Anxiety.* This construct expresses an individual's apprehension or fear when faced  
17  
18 with the possibility of using a computer.[25] Previous research has found a negative relationship  
19  
20 between computer anxiety and perceived usefulness of new technology, as well as to intention to  
21  
22 use a new technology.[26, 27] This results in the following propositions:  
23  
24

25  
26  
27 *H3: Level of computer anxiety will be negatively related to the perceived usefulness of PHRs.*  
28

29  
30 *H4: Level of computer anxiety will be negatively related to the intention to use PHRs.*  
31

32  
33 *Privacy, Security, and Trust.* These concepts have been consistently found in large scale studies  
34  
35 to have an impact on consumer interest in online PHR adoption.[28] While some surveys showed  
36  
37 two-thirds of adult consumers were concerned about security and privacy of their health  
38  
39 data,[17] other market studies found that consumers actually using a PHR did not worry too  
40  
41 much about its privacy implications.[29] The chronically and acutely ill and others who often  
42  
43 require healthcare appear to have fewer concerns about privacy than do health professionals.[30,  
44  
45  
46  
47  
48 31] Consequently, we propose the following hypotheses:  
49

50  
51 *H5: Consumer perceptions of appropriate security and privacy of PHRs, and trust in PHR*  
52  
53 *providers will positively affect their perceptions of PHR usefulness.*  
54  
55

1  
2  
3 *H6: Consumer perceptions of appropriate security and privacy of PHRs, and trust in PHR*  
4 *providers will positively affect their intention to adopt PHRs.*  
5  
6  
7

8  
9 *Perceived Usefulness.* This construct is a widely known and strong extrinsic motivator of  
10 technology use. It expresses “the degree to which a person believes that using a particular system  
11 would enhance his or her job performance”. [32] In the case of PHR use, job performance  
12 (expectancy) would refer to being able to self-monitor accurately certain health parameters.  
13  
14  
15  
16  
17 Thus, it is logical to formulate the hypothesis below:  
18  
19

20  
21 *H7: Higher perceived usefulness for PHRs leads to a higher level of intention to adopt this*  
22 *technology.*  
23  
24  
25

26  
27 The proposed constructs and their related hypotheses are shown in Figure 1 in the form of a  
28 theoretical model of PHR adoption. The final endogenous construct of this model is Behavioral  
29 Intention to adopt PHRs that measures potential user intentions regarding this eHealth support  
30 tool.  
31  
32  
33  
34  
35

36  
37 \*\*\* Insert Figure 1 here. \*\*\*  
38  
39

40  
41 **Figure 1** Theoretical model of PHR adoption  
42  
43  
44  
45

## 46 **MATERIALS AND METHODS**

47

### 48 **Participant recruitment and data collection**

49  
50  
51

52 The theoretical model proposed by this study was tested with empirical data collected through an  
53 online survey of Canadian consumers. Both French and English versions were prepared and pre-  
54  
55  
56

1  
2  
3 tested with graduate students and practitioners in a Canadian university. The full scale survey  
4  
5 was approved by the Research Ethics Board of the university and subsequently conducted with a  
6  
7 Canadian Internet panel of consumers through a market research company. There is no  
8  
9 relationship between the researchers and this company, and the company was not allowed to  
10  
11 analyze nor retain any copies of the data collected during the survey.  
12  
13

14  
15  
16 Participants were required to be at least 18 years old and willing to report their health condition.  
17  
18 Participants were provided detailed descriptions of a chronic illness condition and of its typical  
19  
20 degrees of severity: mild, moderate and severe. 800 of the participants who had pre-registered  
21  
22 with the market research company participated in the experiment: the sample was stratified to  
23  
24 select exactly 400 who reported a chronic illness or disability at various levels of severity, and  
25  
26 exactly 400 who did not report such a condition. These two strata will be indicated in the  
27  
28 remainder of this study as 'Ill' and 'Well'.  
29  
30  
31

32  
33 All participants were presented a detailed description of an electronic Patient Health Record  
34  
35 system and then asked to answer an online questionnaire. The questions it contained were meant  
36  
37 to measure the multi-item latent variables in the theoretical model described in Figure 1, together  
38  
39 with relevant demographic characteristics of the participants surveyed. Most of the survey  
40  
41 questions were adapted from those validated by previous research in healthcare (e.g.,  
42  
43 *Information Seeking*)[33] and information systems (e.g., *Personal Information Technology*  
44  
45 *Innovativeness*, *Computer Anxiety*, *Perceived Usefulness* and *Behavioral Intention*).[24, 27, 32]  
46  
47  
48 Measures for the only formative construct in the model, *Security, Privacy and Trust*, although  
49  
50 initially sourced from separate constructs in relevant information systems literature, were  
51  
52 designed and validated as describing a single variable for this research. Measurement scales are  
53  
54  
55  
56  
57  
58  
59  
60

1  
2  
3 included in Appendix A. All responses were collected on 7-point Likert scales ranging from  
4  
5 Strongly Disagree (1) to Strongly Agree (7), with an additional Not Applicable option. Cases  
6  
7 with more than 10% missing answers were deemed invalid and removed from the data analysis.  
8  
9  
10

### 11 12 13 14 **Theoretical model evaluation** 15

16  
17 As this research was intended mainly for exploratory purposes, data analysis was done with  
18  
19 Partial Least Squares (PLS) due to the suitability of this Structural Equation Modeling  
20  
21 methodology for complex exploratory models,[34] using formative indicators[35] such as the  
22  
23 Security, Privacy and Trust construct used in this research. PLS analysis was carried out with the  
24  
25 SmartPLS software tool[36] and included two successive model assessments: measurement tests  
26  
27 (assessing the reliability and validity of the construct measures), followed by structural tests  
28  
29 (evaluating the relationships between model constructs).[37] Each analysis for the two sub-  
30  
31 samples (Ill and Well) was done separately using the same model.  
32  
33  
34  
35  
36

37 Use of the PLS tool for analysis determined the minimum study sample size. As the study  
38  
39 involves a complex formative construct (i.e., Security, Privacy and Trust), the sample size should  
40  
41 be at least ten times the number of its indicators.[38] Furthermore, sample size should account  
42  
43 for possible high non-response rates or invalid cases in health-related studies. These  
44  
45 considerations led to the target of 400 respondents in each of the two sub-samples.  
46  
47  
48  
49  
50

### 51 52 53 **Assessment of differences between ill and well individuals** 54 55 56 57 58 59 60

1  
2  
3 Results of theoretical model tests for the two sub-samples were compared through differences in  
4 terms of the values of the path coefficients determined by PLS analysis.[38] The degree of  
5 difference was assessed with the *t*-statistic with  $N1+N2-2$  degrees of freedom,[39-41] where:  
6  
7  
8  
9

$$10 \quad t = (Path1 - Path2)/[Spooled*\sqrt{(1/N1+1/N2)}]$$

11  
12 Here, *Path1*, *Path2* are the corresponding path coefficients in the model results and *N1*, *N2* are  
13 the respective sub-sample sizes.  
14  
15  
16

17  
18 *Spooled* represents the pooled estimator for the variance and is calculated from:  
19  
20

$$21 \quad Spooled = \sqrt{\{[square\ of\ (N1-1)/(N1+N2-2)]*\square\ of\ SE1 + [square\ of\ (N2-1)/(N1+N2-2)]*\square\ of\ SE2\}}$$

22  
23 Here *SE1*, *SE2* are the standard errors of the corresponding path coefficients in the two sub-  
24 sample model results.  
25  
26  
27  
28  
29  
30  
31  
32

## 33 34 35 36 37 **RESULTS**

### 38 39 **Characteristics of study participants**

40  
41 After removing the invalid cases, a total of 389 Ill cases and 383 Well cases remained and were  
42 used in further statistical analyses. Raw data analyzed in this study were part of a larger project  
43 conducted in this setting. Table 1 shows comparative demographic characteristics, summarized  
44 for the two strata.  
45  
46  
47  
48  
49  
50  
51  
52  
53  
54  
55  
56  
57  
58  
59  
60

**Table 1** Participant characteristics

|                                                                                                                            |                 | <b>Ill Participants</b> | <b>Well Participants</b> |
|----------------------------------------------------------------------------------------------------------------------------|-----------------|-------------------------|--------------------------|
| <b>Sample size</b>                                                                                                         |                 | 389                     | 383                      |
| <b>Age (years, average)</b>                                                                                                |                 | 52.5                    | 46.5                     |
| <b>Gender</b>                                                                                                              |                 |                         |                          |
|                                                                                                                            | Female          | 248 (63.7%)             | 221 (57.7%)              |
|                                                                                                                            | Male            | 141 (36.3%)             | 162 (42.3%)              |
| <b>Subject maintains up-to-date PHRs on paper</b>                                                                          |                 |                         |                          |
|                                                                                                                            | Yes             | 132 (34.0%)             | 74 (19.2%)               |
|                                                                                                                            | No              | 257 (66.0%)             | 309 (80.8%)              |
| <b>Subject maintains up-to-date electronic PHRs</b>                                                                        |                 |                         |                          |
|                                                                                                                            | Yes             | 46 (11.7%)              | 22 (5.8%)                |
|                                                                                                                            | No              | 343 (88.3%)             | 361 (94.2%)              |
| <b>Number of visits with a doctor during past 6 months (average)</b>                                                       |                 | 5.0                     | 2.3                      |
| <b>Number of doctors seen during past 6 months (average)</b>                                                               |                 | 2.3                     | 1.4                      |
| <b>Number of children 12 years old or younger for whom they have main care responsibility at home (average)</b>            |                 | 0.2                     | 0.3                      |
| <b>Subject (or someone for whom they are responsible) has a chronic disease that requires continuing medical attention</b> |                 |                         |                          |
|                                                                                                                            | Yes             | 308 (79.2%)             | 81 (21.2%)               |
|                                                                                                                            | No              | 81 (20.8%)              | 302 (78.8%)              |
| <b>Subject (or someone for whom they are responsible) has a disability that requires continuing care</b>                   |                 |                         |                          |
|                                                                                                                            | Yes             | 205 (52.7%)             | 42 (11.0%)               |
|                                                                                                                            | No              | 184 (47.3%)             | 341 (89.0%)              |
| <b>Subject is caring for elderly person(s)</b>                                                                             |                 |                         |                          |
|                                                                                                                            | Yes             | 49 (12.6%)              | 21 (5.5%)                |
|                                                                                                                            | No              | 340 (87.4%)             | 362 (94.5%)              |
| <b>Subject is interested in regularly maintaining records about health</b>                                                 |                 |                         |                          |
|                                                                                                                            | Yes             | 323 (83.0%)             | 247 (64.4%)              |
|                                                                                                                            | No              | 66 (17.0%)              | 136 (35.6%)              |
| <b>Average amount of time spent using the Internet at home daily (largest two categories out of five)</b>                  |                 |                         |                          |
|                                                                                                                            | 31 - 60 minutes | 263 (67.7%)             | 222 (58.0%)              |
|                                                                                                                            | 11 - 30 minutes | 99 (25.5%)              | 111 (29.0%)              |

## Theoretical model evaluation

An initial evaluation of the *measurement model* that comprised 22 items indicated the necessity of dropping 2 items when running it with the Ill data sample and 3 items when running it with the Well data sample, because of unsatisfactory significance and loading values of these items. After re-running SmartPLS for the remaining items, all reflective constructs for both samples displayed Cronbach's alpha and composite reliability values above 0.7, Average Variance Extracted (AVE) values above 0.5, and item loadings above 0.7, while the remaining items of the formative construct Security, Privacy and Trust in PHR were significant and had loadings above 0.5. Thus, the measurement model was considered to have acceptable reliability and convergent validity for both sub-samples.[38 ,42, 43]

A visual inspection of a matrix having the square root of AVEs on the diagonal and the correlations between all reflective constructs in the off diagonal cells showed diagonal numbers to be larger than all numbers on the corresponding rows and columns for both sub-samples (Table 2). This led to the conclusion that the model's reflective constructs had sufficient discriminant validity for both sub-samples.[37] Consequently, the measurement tests of the model for both sub-samples indicated adequate reliability and construct validity for all measurement instruments, either adapted from previous research or developed by this study. This allowed the second step of the PLS process, which was to perform the structural analysis of the model.

**Table 2** Reflective construct correlations and square root of AVEs (Ill sample numbers off parentheses and Well sample numbers in parentheses)

|                                   | <b>Computer Anxiety</b> | <b>Behavioral Intention</b> | <b>Information Seeking</b> | <b>Perceived Usefulness</b> | <b>Personal IT Innovativeness</b> |
|-----------------------------------|-------------------------|-----------------------------|----------------------------|-----------------------------|-----------------------------------|
| <b>Computer Anxiety</b>           | <b>0.89 (0.91)</b>      |                             |                            |                             |                                   |
| <b>Behavioral Intention</b>       | -0.51 (-0.38)           | <b>0.87 (0.93)</b>          |                            |                             |                                   |
| <b>Information Seeking</b>        | -0.13 (-0.13)           | 0.27 (0.24)                 | <b>0.86 (0.88)</b>         |                             |                                   |
| <b>Perceived Usefulness</b>       | -0.47 (-0.31)           | 0.76 (0.75)                 | 0.33 (0.34)                | <b>0.92 (0.92)</b>          |                                   |
| <b>Personal IT Innovativeness</b> | -0.33 (-0.17)           | 0.46 (0.38)                 | 0.07 (0.03)                | 0.39 (0.42)                 | <b>0.92 (0.94)</b>                |

Evaluation of the *structural model* involved running SmartPLS with a bootstrap of 200 re-samples. Results for path coefficients, their significance levels, and the values of  $R^2$  are compared in Figure 2 for both sub-samples.

\*\*\* Insert Figure 2 here. \*\*\*

**Figure 2** Path coefficients, significance levels and  $R^2$  values for the PHR adoption model (Ill sub-sample numbers above the line and Well sub-sample numbers below the line)

SmartPLS results also provided the total effects of the factors in the theoretical model on behavioral intention to use PHRs, for the two categories of participants (Table 3).

**Table 3** Total effects and their significance levels on behavioral intention to adopt PHRs

| <b>Antecedent Construct</b> | <b>Ill Sample</b>  |                | <b>Well Sample</b> |                |
|-----------------------------|--------------------|----------------|--------------------|----------------|
|                             | <b>Coefficient</b> | <b>P-value</b> | <b>Coefficient</b> | <b>P-value</b> |



|                              |       |       |       |       |
|------------------------------|-------|-------|-------|-------|
| Computer Anxiety             | -.327 | <.001 | -.212 | .01   |
| Information Seeking          | .118  | .01   | .141  | .01   |
| Perceived Usefulness         | .601  | <.001 | .565  | <.001 |
| Personal IT Innovativeness   | .100  | .08   | .162  | .01   |
| Security, Privacy, and Trust | .377  | <.001 | .479  | <.001 |

All characteristics in Table 1 were tested as potential control variables. In the case of the PHR Ill sub-sample the only influence came from the factor '*subject is interested in regularly maintaining records about health*'. This factor influenced positively the Perceived Usefulness construct (path coefficient of .234 at a  $P = .02$  significance level) and increased the variance explained by this construct from  $R^2 = 0.473$  to  $R^2 = 0.521$ ). In the case of the PHR Well sub-sample the same interest in regularly maintaining records about health influenced positively the Perceived Usefulness construct (path coefficient of .171 at a  $P = .04$  significance level and increased the variance explained from  $R^2 = 0.474$  to  $R^2 = 0.499$ ). In addition for this sub-sample, the factor increased Behavioral Intention (path coefficient of .154 at a  $P = .03$  significance level and increase of variance explained from  $R^2 = 0.620$  to  $R^2 = 0.640$ ). So, the results for the control variable '*subject is interested in regularly maintaining records about health*' played a significant role in both sub-samples.

The self-reported degree of severity of the chronic illness or condition (i.e., mild, moderate or severe) was tested as a possible control variable for the Ill sub-sample. No statistically significant effects on the theoretical model were noticed.

### Assessment of differences between ill and well individuals

The results of the differences between the path coefficients of the model for the two sub-samples are presented jointly in Table 4. No *P*-values were calculated since the lack of statistical significance, at a level of probability  $P < .05$ , of the difference between the results from the two sub-samples (indicated by the low absolute *t*-value of the difference) is very clear.

**Table 4** Statistical analysis of differences between Ill and Well consumer sub-samples

| Path                                                | Ill Sub-sample Path Coefficient | Well Sub-sample Path Coefficient | Absolute <i>t</i> -value of Difference |
|-----------------------------------------------------|---------------------------------|----------------------------------|----------------------------------------|
| Computer Anxiety → Behavioral Intention             | -.177                           | -.142                            | 0.348                                  |
| Computer Anxiety → Perceived Usefulness             | -.249                           | -.123                            | 1.021                                  |
| Information Seeking → Perceived Usefulness          | .196                            | .249                             | 0.479                                  |
| Perceived Usefulness → Behavioral Intention         | .601                            | .565                             | 0.255                                  |
| Personal IT Innovativeness → Perceived Usefulness   | .167                            | .287                             | 0.982                                  |
| Security, Privacy, and Trust → Behavioral Intention | .140                            | .244                             | 0.717                                  |
| Security, Privacy, and Trust → Perceived Usefulness | .393                            | .416                             | 0.161                                  |

## DISCUSSION

### Principal findings and comparison with prior work

The objective of this study was to determine the key motivators for individuals to adopt electronic Personal Health Records, through a theoretical behavioral model developed here. Furthermore, as previous research and theoretical reasoning indicated that people with chronic illnesses may be more likely to be favorable to the adoption of PHRs than people who are well,[9] in our study we use the model we developed to compare two sub-samples drawn in

1  
2  
3 Canada from these two populations in order to assess empirically the possible behavioral  
4  
5 differences and their determinants.  
6  
7

8  
9 Our study (Table 3 and Figure 2) confirms largely the findings of research in information  
10  
11 systems according to which Perceived Usefulness is the key explanation of the behavioral  
12  
13 intention to use an information technology application.[44] Therefore individuals, either  
14  
15 chronically ill or well, would use PHRs only if they see the usefulness of these artifacts. This is  
16  
17 concordant with findings on other empirical studies on PHRs that showed relative advantage[22]  
18  
19 or perception of empowerment[45] as key motivators of adoption.  
20  
21

22  
23 As expected from previous research,[17] the perception of Security, Privacy, and Trust in PHRs  
24  
25 is a significant motivator for use in both categories of individuals surveyed. Table 3 shows this  
26  
27 factor is second in terms of total effect to Perceived Usefulness only, being significant at  $P <$   
28  
29  $.001$  for both sub-samples. Interestingly, Security, Privacy, and Trust in PHRs has a non-  
30  
31 significant direct influence on Behavioral Intention to use PHRs for the Ill sub-sample  
32  
33 (coefficient =  $.140$ ,  $P = .15$ ). This means security, privacy and trust mean less for ill people – the  
34  
35 association of these features with usefulness is more important in the adoption equation. This is  
36  
37 confirmed by previous research showing that benefits of access to medical records online may  
38  
39 outweigh privacy risk perceptions.[46]  
40  
41  
42  
43  
44

45  
46 Study results confirm that Information Seeking and Personal IT Innovativeness are motivators of  
47  
48 PHR use for both categories of potential users while exerting their influence through Perceived  
49  
50 Usefulness (Table 3 and Figure 2). However, the total effect of Personal IT Innovativeness over  
51  
52 adoption intention is not significant for the Ill sub-sample, but it is for the Well sub-sample  
53  
54  
55 (Table 3). ~~This suggests that technical innovativeness means less for ill people than it does for~~  
56  
57  
58  
59  
60

1  
2  
3 well people, indicating that ill people are less interested in adopting a PHR just because it is  
4 innovative, but for other reasons, including the value it can provide in managing their disease(s).  
5  
6  
7

8  
9 As hypothesized, Computer Anxiety is the only deterrent on PHR adoption in the theoretical  
10 model proposed by this study. It has a negative total influence significant at  $P < .001$  for the Ill  
11 sub-sample and at  $P = .01$  for the Well sub-sample (Table 3). ~~Results in Figure 2 confirm that the~~  
12 ~~influence of Anxiety is less apparent for the Well sub-sample compared to the Ill sub-sample.~~  
13 ~~Therefore ill individuals, who presumably might be attracted to using PHRs, would be more~~  
14 ~~concerned about the skills necessary to access computer-based PHRs. Their concerns would~~  
15 ~~clearly have to be addressed in order to increase PHR adoption.~~  
16  
17  
18  
19  
20  
21  
22  
23  
24  
25

26 All demographic characteristics measured and reported in Table 1 were tested as control  
27 variables but had no effect for either sample with the exception of participant interest in regularly  
28 maintaining records about health. This factor was positive for both sub-samples but more so for  
29 the Well one. Therefore, individual interest in self-monitoring health makes them better able to  
30 perceive PHR usefulness and to want to use these systems.  
31  
32  
33  
34  
35  
36  
37

38  
39 Overall, the original model proposed by this study to explain the adoption of PHRs had  
40 moderately high variance explained values for all the endogenous constructs, for both sub-  
41 samples ( $R^2$  of 0.473/0.474 for Perceived Usefulness and 0.620/0.626 for Behavioral Intention)  
42 and 6 out of 7 significant paths in both cases (Figure 2). Therefore, from the statistical point of  
43 view, this model could be considered to be reasonably good.[47]  
44  
45  
46  
47  
48  
49  
50  
51  
52  
53  
54

### 55 **Assessment of differences between ill and well individuals**

56  
57  
58  
59  
60

1  
2  
3 The key outcomes from the study of perceptions on PHRs of Ill and Well individuals in Table 4  
4 show that there were no statistically significant differences (at a level  $P<.05$ ) between the two  
5 sub-samples for any of the paths in Figure 2. On the surface, these outcomes appear to contradict  
6 what we had expected – that people with chronic illnesses or disabilities are more interested in  
7 PHR adoption than are well people. We suspect that the differences are masked by the fact that  
8 many of the people in the Ill sample were, in fact, not seriously ill. The low rate of current PHR  
9 use in the both sub-samples could be another explanation for the non-significant differences in  
10 perceptions between them. Findings from consumers, especially those with serious chronic  
11 illnesses, who had a considerable amount of experience with well-designed PHRs, might be  
12 more conclusive than the results from this comparative survey.  
13  
14  
15  
16  
17  
18  
19  
20  
21  
22  
23  
24  
25  
26  
27  
28  
29  
30

### 31 **Limitations**

32  
33  
34 As in virtually any empirical research, this study has some limitations. First, it is likely that the  
35 functionalities that accompany PHR systems would have a strong influence on their adoption.  
36 This aspect was not measured in this study. Second, the participants were all Internet users, so it  
37 excluded many, particularly older, consumers who were not. In fact more than 60% of the survey  
38 participants overall claimed to use the Internet for from 30 to 60 minutes per day. On the other  
39 hand, the proportion of Internet and portable device users falls off rapidly with age beyond 65  
40 years,[48] especially for lower income seniors. Therefore, “those who can benefit the most from  
41 a PHR system may be the least able to use it”.[49] In addition to all these limitations, the most  
42 important for a comparative study such as this, participant health conditions were self-reported  
43 and not diagnosed by practitioners. Therefore, it is possible that the difference we found in  
44  
45  
46  
47  
48  
49  
50  
51  
52  
53  
54  
55  
56  
57  
58  
59  
60

1  
2  
3 overall perceptions between the two sub-samples was not significant because the difference in  
4  
5 participant self-reported health condition between the two sub-samples was weak.  
6  
7  
8  
9

## 10 11 12 **CONCLUSIONS**

13  
14  
15 Despite the inherent limitations of an exploratory study, this research has the merit of  
16  
17 investigating individual perceptions about electronic PHRs, using a rigorous theoretical approach  
18  
19 that considers the perspectives of ill and well people separately. While remaining parsimonious,  
20  
21 the theoretical model developed by this research has the merit of explaining a reasonably high  
22  
23 percent of the consumer intention to use electronic PHRs and thus could be a starting point for  
24  
25 researchers examining more complex models of eHealth adoption.  
26  
27  
28

29  
30 According to the findings of this research, to maximize the chances of adoption for PHR support  
31  
32 in self-management initiatives, it appears necessary to enhance the motivators, especially the  
33  
34 perceptions of usefulness as well as that of security, privacy and trust in PHRs, while mitigating  
35  
36 anxieties associated with computer use. Developers and implementers of electronic PHRs should  
37  
38 try to enhance the perceptions of positive factors among consumers, and focus on the benefits of  
39  
40 using these systems in particular, since favourable factors are far more important than deterrents  
41  
42 in the overall adoption equation.  
43  
44  
45

46  
47 A first exposure to PHRs did not reveal significantly different perceptions of this tool between  
48  
49 individuals who reported having a chronic illness and those who reported being well. Therefore  
50  
51 it appears that both categories of potential users should be addressed by promoters of PHRs in  
52  
53 much the same way in terms of motivating and demotivating factors. However, caution is  
54  
55  
56  
57

1  
2  
3 advised regarding assumptions of equivalence between individuals who report being chronically  
4  
5 ill and those who have been diagnosed accordingly. Thus, future studies should attempt to survey  
6  
7 chronically ill patients recruited through the healthcare system, after having a specified  
8  
9 experience with self-managing their conditions with the aid of PHRs. A comparison of their  
10  
11 perceptions of PHRs with those of well individuals would help to improve our understanding of  
12  
13 how the adoption of PHRs could be increased overall.  
14  
15  
16  
17  
18  
19  
20

21 **Funding** This research was funded by a grant from the Canadian Institutes for Health Research.  
22  
23 This organization was not involved directly in the design or implementation of this study. This  
24  
25 article is solely the responsibility of the authors and does not necessarily represent the official  
26  
27 views of the Canadian Institutes of Health Research.  
28  
29  
30  
31  
32  
33

34 **Competing interests** None.  
35  
36  
37  
38  
39  
40

41 **Ethics approval** Research Ethics Board of a Canadian university.  
42  
43  
44  
45  
46

47 **Data sharing statement** No additional data available.  
48  
49  
50  
51  
52  
53  
54  
55  
56  
57  
58  
59  
60

## Figure legends

**Figure 1** Theoretical model of PHR adoption

**Figure 2** Path coefficients, significance levels and  $R^2$  values for the PHR adoption model (Ill sub-sample numbers above the line and Well sub-sample numbers below the line)

## REFERENCES

1. Holman H, Lorig, K. Patient self-management: a key to effectiveness and efficiency in care of chronic disease. *Public Health Reports* 2004;**119**:239-43.
2. Warsi A, Wang PS, LaValley MP, et al. Self-management education programs in chronic disease. *Arch Intern Med* 2004;**164**(15):1641-9. PMID: 15302634.
3. Weitzman ER, Kaci L, Mandl KD. Acceptability of a personally controlled health record in a community-based setting: implications for policy and design. *J Med Internet Res* 2009;**11**(2):e14. URL: <http://www.jmir.org/2009/2/e14/> doi: 10.2196/jmir.1187 PMID: 19403467.
4. Bodenheimer T, Wagner EH, Grumbach K. Improving chronic care for patients with chronic illness: the chronic care model, Part 2. *J Am Med Assoc* 2002;**16**(288):1909-14. PMID: 12377092.
5. Alphin S, Kjoller M, Davidsen M, et al. Self-reported ischemic heart disease: prevalence, sociodemographics, health behavior, health-care utilization, and quality of life. *Open J Prev Med* 2012;**2**(2):240-8.
6. Hess R, Bryce CL, Paone S, et al. Exploring challenges and potentials of personal health records in diabetes self-management: implementation and initial assessment. *Telemed J E Health* 2007;**13**(5):509-18.
7. Siminerio LM. The role of technology and the chronic care model. *J Diabetes Sci Technol* 2010;**4**(2):470-5.
8. Wiljer D, Urowitz S, Apatu E, et al. Patient accessible electronic health records: exploring recommendations for successful implementation strategies. *J Med Internet Res* 2008;**10**(4):e34. URL: <http://www.jmir.org/2008/4/e34/> doi: 10.2196/jmir.1061 PMID: 18974036.
9. Markle Foundation. The personal health working group final report 2003. URL:<http://research.policyarchive.org/15473.pdf>. Accessed: 2013-10-27. (Archived by WebCite® at <http://www.webcitation.org/6KhE3vwDS>).
10. Tang PC, Ash JS, Bates DW, et al. Personal health records: Definitions, benefits, and strategies for overcoming barriers to adoption. *J Am Med Inform Assoc* 2006 Mar-Apr;**13**(2):121-6. doi: 10.1197/jamia.M2025 PMID: 16357345.
11. Halamka JD, Mandl KD, Tang PC. Early experiences with personal health records. *J Am Med Inform Assoc* 2008 Jan-Feb;**15**(1):1-7. PMID: 17947615.



12. Eysenbach G. The law of attrition. *J Med Internet Res* 2005;7(1):e11. URL: <http://www.jmir.org/2005/1/e11/> doi: 10.2196/jmir.7.1.e11 PMID: 15829473.
13. Farvolden P, Denisoff E, Selby P, et al. Usage and longitudinal effectiveness of a web-based self-help cognitive behavioral therapy program for panic disorder. *J Med Internet Res* 2005;7(1):e7. URL: <http://www.jmir.org/2005/1/e7/> doi: 10.2196/jmir.7.1.e7 PMID: 15829479.
14. Etter JF. Comparing the efficacy of two Internet-based, computer-tailored smoking cessation programs: a randomized trial. *J Med Internet Res* 2005;7(1):e2. URL: <http://www.jmir.org/2005/1/e2/> doi: 10.2196/jmir.7.1.e2 PMID: 15829474.
15. Fielding D, Duff A. Compliance with treatment protocols: interventions for children with chronic illness. *Arch Dis Child* 1999 Feb;80(2):196-200. PMID: 10325743.
16. Shankar A, Conner M, Bodansky HJ. Can the theory of planned behaviour predict maintenance of a frequently repeated behaviour? *Psychol Health Med*. 2007 Mar;12(2):213-224. PMID: 17365901.
17. Markle Foundation. Americans overwhelmingly believe electronic personal health records could improve their health 2008. URL: <http://www.markle.org/sites/default/files/ResearchBrief-200806.pdf>. Accessed: 2013-10-27. (Archived by WebCite® at <http://www.webcitation.org/67gKru0S3>).
18. Lafky DB, Horan TA. Prospective personal health record use among different user groups: results of a multi-wave study. Hawaii International Conference on System Sciences, Proceedings of the 41st Annual, Hawaii, U.S.A, 7-10 Jan. 2008. doi: 10.1109/HICSS.2008.363.
19. King DK, Toobert DJ, Portz JD, et al. What patients want: relevant health information technology for diabetes self-management. *Health and Technology* 2012;2:147-157. doi: 10.1007/s12553-012-0022-7.
20. Benhamou PY. Improving diabetes management with electronic health records and patients' health records. *Diabetes Metab* 2011 Dec;37 Suppl 4:S53-S56. doi: 10.1016/S1262-3636(11)70966-1. PMID: 22208711.
21. Gilmour H. Social participation and the health and well-being of Canadian seniors. *Health Rep* 2012 Dec;23(4):23-32. PMID: 23356042.
22. Emani S, Yamin CK, Peters E, et al. Patient perceptions of a personal health record: a test of the Diffusion of Innovation model. *J Med Internet Res* 2012;14(6):e150. URL: <http://www.jmir.org/2012/6/e150/> doi: 10.2196/jmir.2278 PMID: 23128775.
23. Strull WM, Lo B, Charles G. Do patients want to participate in medical decision making? *J Am Med Assoc*, 1984 Dec 7;252(21):2990-4. PMID: 6502860.
24. Agarwal R, Prasad J. A conceptual and operational definition of personal innovativeness in the domain of information technology. *Information Systems Research* 1998;9(2):204-15.
25. Simonson MR, Maurer M, Montag-Torardi M, et al. Development of a standardized test of computer literacy and a computer anxiety index. *Journal of Educational Computing Research* 1987;3(2):231-247.
26. Igarria M, Schiffman SJ, Wieckowski TJ. The respective roles of perceived usefulness and perceived fun in the acceptance of microcomputer technology. *Behaviour and Information Technology* 1994;13(6):349-61.

- 1  
2  
3 27. Venkatesh V, Morris MG, Davis GB, et al. User acceptance of information technology:  
4 Toward a unified view. *MIS Quarterly* 2003;**27**(3):425-478.
- 5  
6 28. Wen KY, Kreps G, Zhu F, et al. Consumers' perceptions about and use of the Internet for  
7 personal health records and health information exchange: analysis of the 2007 Health  
8 Information National Trends survey. *J Med Internet Res* 2010;**12**(4):e73.  
9 URL: <http://www.jmir.org/2010/4/e73/> doi: 10.2196/jmir.1668 PMID: 21169163.
- 10  
11 29. CHCF. Consumers and health information technology: a national survey 2010.  
12 URL:[http://www.chcf.org/publications/2010/04/consumers-and-health-information-](http://www.chcf.org/publications/2010/04/consumers-and-health-information-technology-a-national-survey)  
13 [technology-a-national-survey](http://www.chcf.org/publications/2010/04/consumers-and-health-information-technology-a-national-survey). Accessed: 2013-10-27. (Archived by WebCite® at  
14 <http://www.webcitation.org/6Ki6wprfO>).
- 15  
16 30. Hassol A, Walker JM, Kidder D, et al. Patient experiences and attitudes about access to a  
17 patient electronic health care record and linked Web messaging. *J Am Med Inform Assoc*  
18 2004 Nov-Dec;**11**(6):505-13. PMID: 15299001.
- 19  
20 31. Walker J, Ahern DK, Le LX, et al. Insights for internists: "I want the computer to know  
21 who I am". *J Gen Intern Med* 2009 Jun;**24**(6):727-32. doi: 10.1007/s11606-009-0973-1  
22 PMID: 19412641.
- 23  
24 32. Davis F. Perceived usefulness, perceived ease of use, and user acceptance of information  
25 technology. *MIS Quarterly* 1989;**13**(3):319-40.
- 26  
27 33. Wilson EV, Lankton NK. Modeling patients' acceptance of provider-delivered e-health. *J*  
28 *Am Med Inform Assoc*. 2004 Jul-Aug;**11**(4):241-8. PMID: 15064290.
- 29  
30 34. Bontis N, Crossan MM, Hulland J. Managing an organizational learning system by  
31 aligning stocks and flows. *Journal of Management Studies* 2002;**39**(4):437-69.
- 32  
33 35. Thomas RD, Lu IRR, Cedzynski M. Partial least squares: a critical review and a potential  
34 alternative. 2005 Administrative Sciences Association of Canada Conference, Toronto,  
35 Ontario, Canada.  
36 URL:[http://citeseerx.ist.psu.edu/viewdoc/download?doi=10.1.1.86.1719&rep=rep1&type](http://citeseerx.ist.psu.edu/viewdoc/download?doi=10.1.1.86.1719&rep=rep1&type=pdf)  
37 [=pdf](http://citeseerx.ist.psu.edu/viewdoc/download?doi=10.1.1.86.1719&rep=rep1&type=pdf). Accessed: 2013-10-28. (Archived by WebCite® at  
38 <http://www.webcitation.org/6Ki8UyHTh>).
- 39  
40 36. Ringle CM, Wende S, Will, A. SmartPLS 2.0 (M3) Beta; 2005.  
41 URL:<http://www.smartpls.de/forum>. Accessed: 2013-10-28. (Archived by WebCite® at  
42 <http://www.webcitation.org/5uZLmc5cJ>).
- 43  
44 37. Gefen D, Straub D. A practical guide to factorial validity using PLS-Graph: tutorial and  
45 annotated example. *Communications of the Association for Information Systems*  
46 2005;**16**:91-109.
- 47  
48 38. Jarvenpaa SL, Shaw TR, Staples DS. Toward contextualized theories of trust: the role of  
49 trust in global virtual teams. *Information Systems Research* 2004 September;**15**(3):250-  
50 267.
- 51  
52 39. Ahuja MK, Thatcher, JB. Moving beyond intentions and toward the theory of trying:  
53 effects of work environment and gender on post-adoption information technology use.  
54 *MIS Quarterly* 2005 Sep; **29**(3):427-59.
- 55  
56 40. Archer N, Cocosila M. A comparison of physician pre-adoption and adoption views on  
57 Electronic Health Records in Canadian medical practices. *J Med Internet Res*  
58 2011;**13**(3):e57. URL: <http://www.jmir.org/2011/3/e57/> doi: 10.2196/jmir.1726  
59 PMID: 21840835.
- 60

- 1  
2  
3  
4  
5  
6  
7  
8  
9  
10  
11  
12  
13  
14  
15  
16  
17  
18  
19  
20  
21  
22  
23  
24  
25  
26  
27  
28  
29  
30  
31  
32  
33  
34
41. Chin WW. Frequently asked questions - Partial Least Squares & PLS-Graph; 2000. URL: <http://disc-nt.cba.uh.edu/chin/plsfaq/plsfaq.htm>. Accessed: 2013-10-28. (Archived by WebCite® at <http://www.webcitation.org/5uZMSOxrz>).
  42. Bontis N. National intellectual capital index: a United Nations initiative for the Arab region. *Journal of Intellectual Capital* 2004;**5**(1):13-39.
  43. Fornell C, Larcker, DF. Evaluating structural equation models with unobservable variables and measurement error. *Journal of Marketing Research* 1981;**18**(1):39-50.
  44. Venkatesh V, Speier C, Morris MG. User acceptance enablers in individual decision making about technology: toward an integrated model. *Decision Sciences* 2002;**33**(2):297-316.
  45. Agarwal R, Anderson C, Zarate J, et al. If we offer it, will they accept? Factors affecting patient use intentions of personal health records and secure messaging *J Med Internet Res* 2013;**15**(2):e43. URL: <http://www.jmir.org/2013/2/e43/> doi: 10.2196/jmir.2243 PMID: 23470453.
  46. Vodicka E, Mejilla R, Leveille SG, et al. Online access to doctors' notes: patient concerns about privacy. *J Med Internet Res* 2013;**15**(9):e208. URL: <http://www.jmir.org/2013/9/e208/> doi: 10.2196/jmir.2670 PMID: 24072335.
  47. Bontis N, Keow WCC, Richardson S. Intellectual capital and business performance in Malaysian industries. *Journal of Intellectual Capital* 2000;**1**(1):85-100.
  48. Pew Internet. Mobile Health 2012. Pew Internet Research Center 2012. URL:<http://pewinternet.org/Reports/2012/Mobile-Health.aspx>. Accessed: 2013-10-28. (Archived by WebCite® at <http://www.webcitation.org/6Ki9MnKwz>).
  49. Kim EH, Stolyar A, Lober WB, et al. Challenges to using an electronic personal health record by a low-income elderly population. *J Med Internet Res* 2009;**11**(4):e44. URL: <http://www.jmir.org/2009/4/e44/> doi: 10.2196/jmir.1256 PMID: 19861298.

## APPENDIX A

### Measurement scales

#### *Information Seeking*

I believe that doctors should explain the purpose of laboratory and other tests.

I believe that the results of laboratory and other tests should be made available to patients.

I believe that people should know all the important side effects of their medications.

#### *Personal Information Technology Innovativeness*

1  
2  
3 If I hear about a new information technology I look for ways to experiment with it.

4  
5 Among my friends I am usually the first to try out new information technologies.

6  
7 In general, I am eager to try out new information technologies.  
8  
9

### 10 11 12 *Computer Anxiety*

13  
14  
15 I would feel apprehensive about using an Electronic Personal Health Record system.

16  
17 It scares me to think that I could lose a lot of information using an Electronic Personal Health  
18 Record system by hitting the wrong key.  
19

20  
21 Using an Electronic Personal Health Record system would make me nervous.  
22  
23

### 24 25 26 *Security, Privacy and Trust*

27  
28  
29 From a security and privacy perspective I would prefer to maintain up-to-date electronic personal  
30 health records on a system that:

31  
32 Ran strictly on my own personal computer.

33  
34 Ran strictly on my own personal computer, with provision to take the records with me on a  
35 secure memory device, such as a smart card, as needed.  
36

37  
38 Is accessible through a secure Internet web site that is maintained by the provincial government's  
39 health authority.  
40

41  
42 Is accessible through a secure Internet web site that is maintained by my own family doctor.

43  
44 Is accessible through a secure Internet web site that is maintained by a private company.  
45  
46

### 47 48 49 *Perceived Usefulness*

50  
51  
52 Using my own Electronic Personal Health Records would help to support critical aspects of my  
53 health care such as scheduling appointments, recording my health status, etc.  
54

55  
56 Using my own Electronic Personal Health Records would enhance my effectiveness in managing  
57 my own health care, such as managing medications, reviewing my progress, etc.  
58

1  
2  
3 Using my own Electronic Personal Health Records would make me more effective in providing  
4 up-to-date health information about myself when interacting with my physician.  
5

6 Using my own Electronic Personal Health Records would help to improve my health.  
7

8 Overall, having my own Electronic Personal Health Record system would be useful in managing  
9 my health care.  
10  
11

12  
13  
14  
15 *Behavioural Intention to Adopt an ePHR*  
16

17  
18 If an Electronic Personal Health Record system is made available for me, I intend to use it.  
19

20 If an Electronic Personal Health Record system is made available for me, I predict that I would  
21 use it.  
22

23 If an Electronic Personal Health Record system is made available for me, I intend to work  
24 together with my spouse or other caregiver(s) to use it on my behalf.  
25  
26  
27  
28  
29  
30  
31  
32  
33  
34  
35  
36  
37  
38  
39  
40  
41  
42  
43  
44  
45  
46  
47  
48  
49  
50  
51  
52  
53  
54  
55  
56  
57  
58  
59  
60

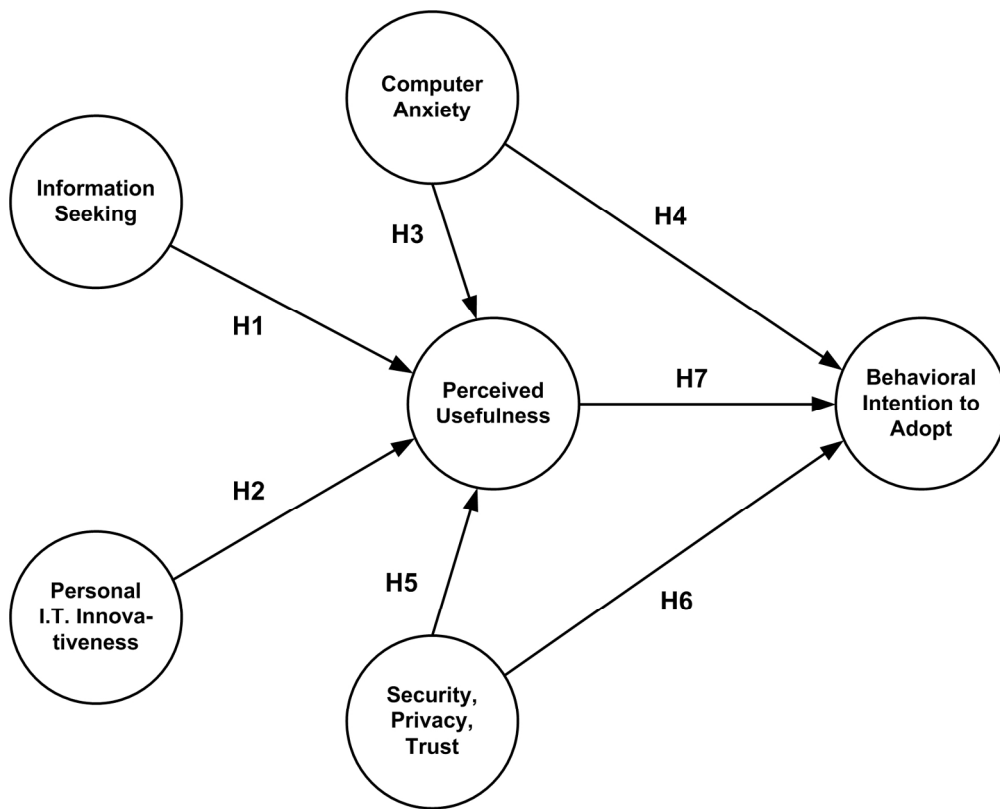

Figure 1 Theoretical model of PHR adoption  
163x130mm (300 x 300 DPI)

ew only

1  
2  
3  
4  
5  
6  
7  
8  
9  
10  
11  
12  
13  
14  
15  
16  
17  
18  
19  
20  
21  
22  
23  
24  
25  
26  
27  
28  
29  
30  
31  
32  
33  
34  
35  
36  
37  
38  
39  
40  
41  
42  
43  
44  
45  
46  
47  
48  
49  
50  
51  
52  
53  
54  
55  
56  
57  
58  
59  
60

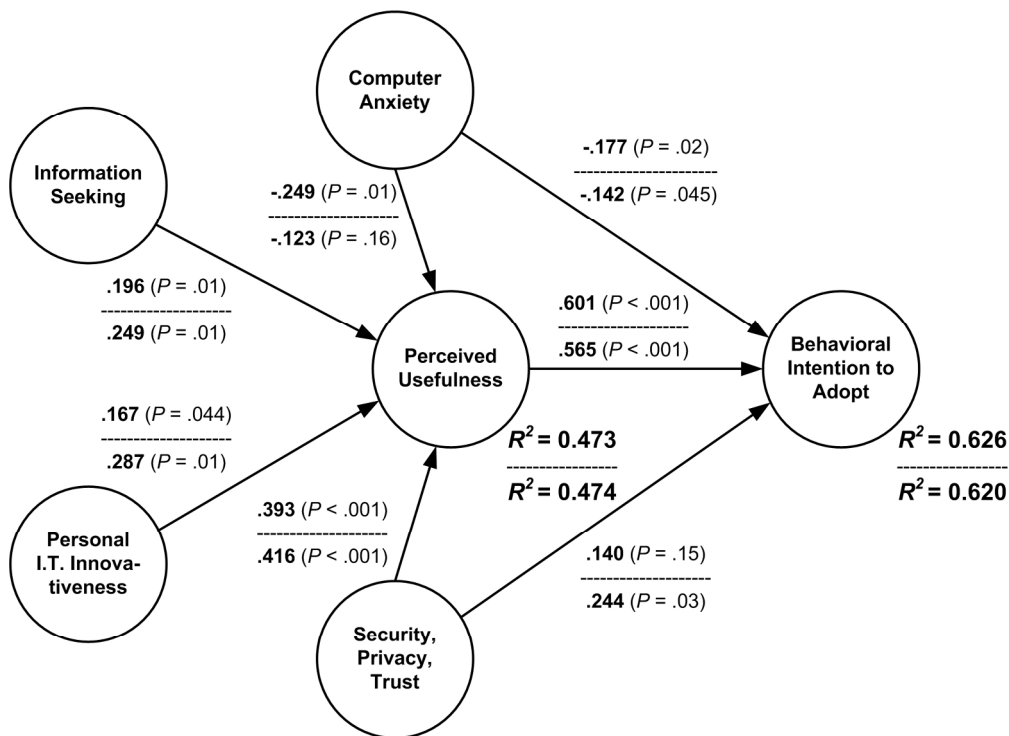

Figure 2 Path coefficients, significance levels and R2 values for the PHR adoption model (Ill sub-sample numbers above the line and Well sub-sample numbers below the line)  
179x130mm (300 x 300 DPI)

Review only

1  
2  
3 **APPENDIX A**

4  
5 **Measurement scales**

6  
7  
8 *Information Seeking*

9  
10  
11 I believe that doctors should explain the purpose of laboratory and other tests.

12  
13 I believe that the results of laboratory and other tests should be made available to patients.

14  
15 I believe that people should know all the important side effects of their medications.

16  
17  
18  
19  
20  
21 *Personal Information Technology Innovativeness*

22  
23  
24 If I hear about a new information technology I look for ways to experiment with it.

25  
26 Among my friends I am usually the first to try out new information technologies.

27  
28 In general, I am eager to try out new information technologies.

29  
30  
31  
32  
33 *Computer Anxiety*

34  
35  
36  
37 I would feel apprehensive about using an Electronic Personal Health Record system.

38  
39 It scares me to think that I could lose a lot of information using an Electronic Personal Health  
40 Record system by hitting the wrong key.

41  
42 Using an Electronic Personal Health Record system would make me nervous.

43  
44  
45  
46  
47 *Security, Privacy and Trust*

48  
49  
50 From a security and privacy perspective I would prefer to maintain up-to-date electronic personal  
51 health records on a system that:

52  
53  
54 Ran strictly on my own personal computer.



1  
2  
3 Ran strictly on my own personal computer, with provision to take the records with me on a  
4 secure memory device, such as a smart card, as needed.  
5

6  
7 Is accessible through a secure Internet web site that is maintained by the provincial government's  
8 health authority.  
9

10 Is accessible through a secure Internet web site that is maintained by my own family doctor.

11 Is accessible through a secure Internet web site that is maintained by a private company.  
12  
13

### 14 15 16 17 *Perceived Usefulness* 18

19  
20 Using my own Electronic Personal Health Records would help to support critical aspects of my  
21 health care such as scheduling appointments, recording my health status, etc.  
22

23 Using my own Electronic Personal Health Records would enhance my effectiveness in managing  
24 my own health care, such as managing medications, reviewing my progress, etc.  
25

26 Using my own Electronic Personal Health Records would make me more effective in providing  
27 up-to-date health information about myself when interacting with my physician.  
28

29 Using my own Electronic Personal Health Records would help to improve my health.  
30

31 Overall, having my own Electronic Personal Health Record system would be useful in managing  
32 my health care.  
33  
34  
35  
36  
37

### 38 *Behavioural Intention to Adopt an ePHR* 39

40  
41 If an Electronic Personal Health Record system is made available for me, I intend to use it.  
42

43 If an Electronic Personal Health Record system is made available for me, I predict that I would  
44 use it.  
45

46 If an Electronic Personal Health Record system is made available for me, I intend to work  
47 together with my spouse or other caregiver(s) to use it on my behalf.  
48  
49  
50  
51  
52  
53  
54  
55  
56  
57  
58  
59  
60

STROBE 2007 (v4) Statement—Checklist of items that should be included in reports of *cross-sectional studies*

| Section/Topic                | Item # | Recommendation                                                                                                                                                                       | Reported on page # |
|------------------------------|--------|--------------------------------------------------------------------------------------------------------------------------------------------------------------------------------------|--------------------|
| Title and abstract           | 1      | (a) Indicate the study's design with a commonly used term in the title or the abstract                                                                                               | 1                  |
|                              |        | (b) Provide in the abstract an informative and balanced summary of what was done and what was found                                                                                  | 1, 2               |
| <b>Introduction</b>          |        |                                                                                                                                                                                      |                    |
| Background/rationale         | 2      | Explain the scientific background and rationale for the investigation being reported                                                                                                 | 3-6                |
| Objectives                   | 3      | State specific objectives, including any prespecified hypotheses                                                                                                                     | 6-9                |
| <b>Methods</b>               |        |                                                                                                                                                                                      |                    |
| Study design                 | 4      | Present key elements of study design early in the paper                                                                                                                              | 9, 10              |
| Setting                      | 5      | Describe the setting, locations, and relevant dates, including periods of recruitment, exposure, follow-up, and data collection                                                      | 9, 10              |
| Participants                 | 6      | (a) Give the eligibility criteria, and the sources and methods of selection of participants                                                                                          | 9                  |
| Variables                    | 7      | Clearly define all outcomes, exposures, predictors, potential confounders, and effect modifiers. Give diagnostic criteria, if applicable                                             | 10                 |
| Data sources/<br>measurement | 8*     | For each variable of interest, give sources of data and details of methods of assessment (measurement). Describe comparability of assessment methods if there is more than one group | 10                 |
| Bias                         | 9      | Describe any efforts to address potential sources of bias                                                                                                                            | 9                  |
| Study size                   | 10     | Explain how the study size was arrived at                                                                                                                                            | 9                  |
| Quantitative variables       | 11     | Explain how quantitative variables were handled in the analyses. If applicable, describe which groupings were chosen and why                                                         | 10, 11             |
| Statistical methods          | 12     | (a) Describe all statistical methods, including those used to control for confounding                                                                                                | 10, 11             |
|                              |        | (b) Describe any methods used to examine subgroups and interactions                                                                                                                  | 10,11              |
|                              |        | (c) Explain how missing data were addressed                                                                                                                                          | 11                 |
|                              |        | (d) If applicable, describe analytical methods taking account of sampling strategy                                                                                                   |                    |
|                              |        | (e) Describe any sensitivity analyses                                                                                                                                                |                    |
| <b>Results</b>               |        |                                                                                                                                                                                      |                    |

|                          |     |                                                                                                                                                                                                              |        |
|--------------------------|-----|--------------------------------------------------------------------------------------------------------------------------------------------------------------------------------------------------------------|--------|
| Participants             | 13* | (a) Report numbers of individuals at each stage of study—eg numbers potentially eligible, examined for eligibility, confirmed eligible, included in the study, completing follow-up, and analysed            | 11     |
|                          |     | (b) Give reasons for non-participation at each stage                                                                                                                                                         | 11     |
|                          |     | (c) Consider use of a flow diagram                                                                                                                                                                           |        |
| Descriptive data         | 14* | (a) Give characteristics of study participants (eg demographic, clinical, social) and information on exposures and potential confounders                                                                     | 12     |
|                          |     | (b) Indicate number of participants with missing data for each variable of interest                                                                                                                          | 11     |
| Outcome data             | 15* | Report numbers of outcome events or summary measures                                                                                                                                                         | 12     |
| Main results             | 16  | (a) Give unadjusted estimates and, if applicable, confounder-adjusted estimates and their precision (eg, 95% confidence interval). Make clear which confounders were adjusted for and why they were included | 14, 15 |
|                          |     | (b) Report category boundaries when continuous variables were categorized                                                                                                                                    |        |
|                          |     | (c) If relevant, consider translating estimates of relative risk into absolute risk for a meaningful time period                                                                                             |        |
| Other analyses           | 17  | Report other analyses done—eg analyses of subgroups and interactions, and sensitivity analyses                                                                                                               | 15, 16 |
| <b>Discussion</b>        |     |                                                                                                                                                                                                              |        |
| Key results              | 18  | Summarise key results with reference to study objectives                                                                                                                                                     | 16-19  |
| Limitations              | 19  | Discuss limitations of the study, taking into account sources of potential bias or imprecision. Discuss both direction and magnitude of any potential bias                                                   | 19     |
| Interpretation           | 20  | Give a cautious overall interpretation of results considering objectives, limitations, multiplicity of analyses, results from similar studies, and other relevant evidence                                   | 20     |
| Generalisability         | 21  | Discuss the generalisability (external validity) of the study results                                                                                                                                        | 20     |
| <b>Other information</b> |     |                                                                                                                                                                                                              |        |
| Funding                  | 22  | Give the source of funding and the role of the funders for the present study and, if applicable, for the original study on which the present article is based                                                | 20     |

\*Give information separately for cases and controls in case-control studies and, if applicable, for exposed and unexposed groups in cohort and cross-sectional studies.

**Note:** An Explanation and Elaboration article discusses each checklist item and gives methodological background and published examples of transparent reporting. The STROBE checklist is best used in conjunction with this article (freely available on the Web sites of PLoS Medicine at <http://www.plosmedicine.org/>, Annals of Internal Medicine at <http://www.annals.org/>, and Epidemiology at <http://www.epidem.com/>). Information on the STROBE Initiative is available at [www.strobe-statement.org](http://www.strobe-statement.org).
